# Supplementary material for: Expeditious synthesis of phenanthridines through a Pd/MnO2-mediated C–H arylation/oxidative annulation cascade from aldehydes, aryl iodides and amino acids
Source: Royal Society of Chemistry journal article supplement (doi:10.1039/d0cc00300j), 2020-01-01

## Supporting Information

### Expeditious Synthesis of Phenanthridines through Pd/MnO<sub>2</sub>-Mediated C-H Arylation/Oxidative Annulation Cascade from Aldehydes, Aryl Iodides and Amino Acid

Jian Fan, Li Li, Jitan Zhang\* and Meihua Xie\*

Key Laboratory of Functional Molecular Solids (Ministry of Education), Anhui Key Laboratory of Molecular Based  
Materials, College of Chemistry and Materials Science, Anhui Normal University, Wuhu, 241000, China

|                                                                         |         |
|-------------------------------------------------------------------------|---------|
| ◆ General Information and Procedure for the Reaction.....               | S2      |
| 1. General information.....                                             | S2      |
| 2. Optimization of reaction conditions.....                             | S2-S9   |
| 3. General procedure for synthesis of phenanthridine.....               | S9      |
| 4. Gram-scale preparation of <b>3aa</b> and competition experiment..... | S9-S10  |
| 5. Control experiments.....                                             | S10-S13 |
| 6. GC-MS analysis.....                                                  | S14-S15 |
| 7. Deuteration Studies.....                                             | S16-S20 |
| 8. Proposed mechanism (Scheme S1).....                                  | S21     |
| ◆ Analytic Data of Products.....                                        | S22-S39 |
| ◆ Copies of <sup>1</sup> H, <sup>13</sup> C Spectra.....                | S40-S86 |

## 1. General information:

All commercial materials were used as received unless otherwise noted. Commercial reagents were purchased from Alfa Aesar, TCI, Energy Chemical, and used without further purification.  $^1\text{H}$  NMR spectra were recorded at 400 MHz or 500 MHz NMR spectrometers using TMS as an internal standard,  $^{13}\text{C}$  NMR spectra were recorded at 100 MHz or 125 MHz NMR spectrometers using  $\text{CDCl}_3$  as an internal standard and were fully decoupled by broad band proton decoupling. The multiplicities are reported as follows: singlet (s), doublet (d), doublet of doublets (dd), multiplet (m), triplet (t) and broad resonances (br). Melting points were measured on a hot-stage microscope (XT4-A) and are uncorrected. High resolution mass spectra (HRMS) were obtained on an APEXM Fourier transform mass spectrometry (APCI). EPR spectra were obtained using Bruker EMX plus6/1 X-band variable-temperature apparatus.

## 2. Optimization of reaction conditions

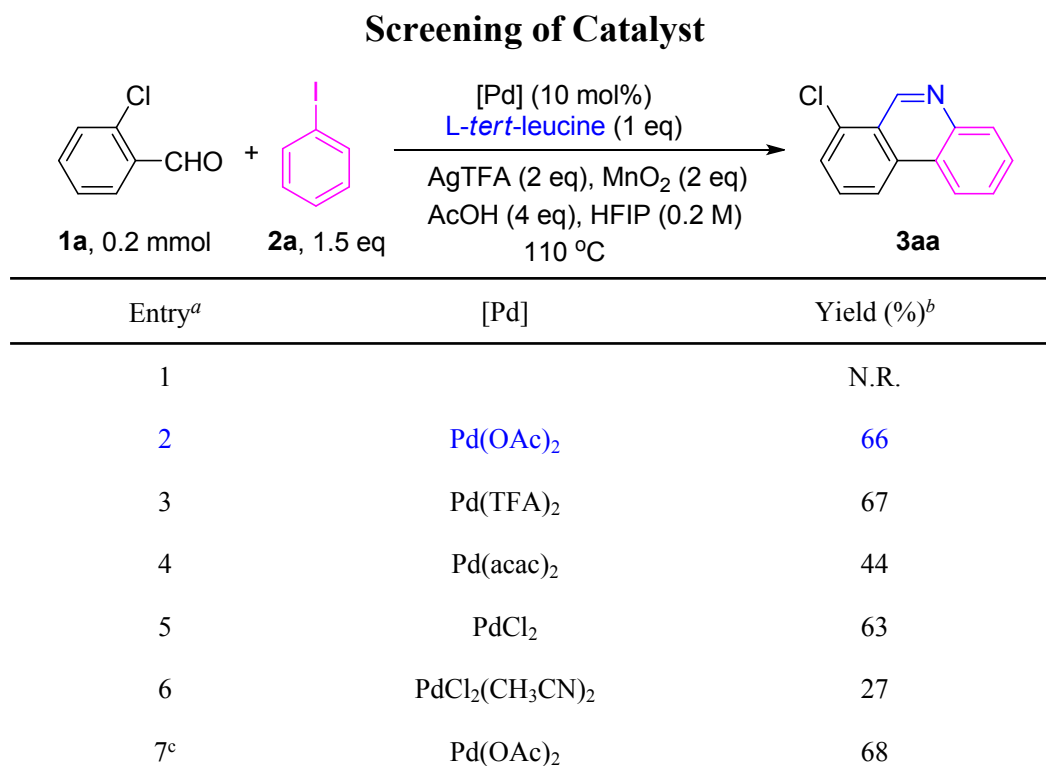

<sup>a</sup> Reactions conditons: **1** (0.2 mmol), **2** (0.3 mmol), *L-tert-leucine* (0.2 mmol), [Pd] (0.02 mmol), AgTFA (0.4 mmol), MnO<sub>2</sub> (0.4 mmol), AcOH (0.8 mmol), HFIP (1 mL), 110 °C, 24 h. <sup>b</sup> Isolated yield by flash column chromatography. <sup>c</sup> 15 mmol% of Pd(OAc)<sub>2</sub>.

### Screening of Amino Acid

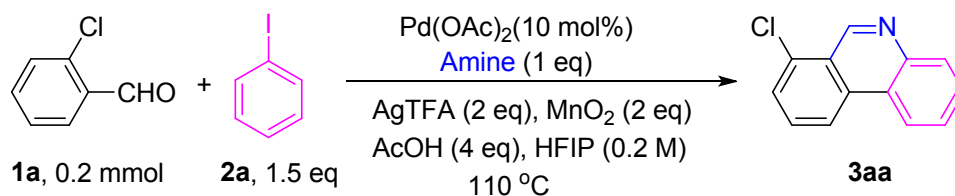

| Entry <sup>a</sup> | Amine                       | Yield (%) <sup>b</sup>            |
|--------------------|-----------------------------|-----------------------------------|
| 1                  |                             | N.D.                              |
| 2                  | <i>L-tert-leucine</i>       | 66                                |
| 3                  | L-alanine                   | trace                             |
| 4                  | L-aspartic acid             | trace                             |
| 5                  | L-valine instead            | 15                                |
| 6                  | L-isoleucine                | 12 <sup>g</sup>                   |
| 7                  | Glycine                     | trace                             |
| 8                  | D, <i>L-tert-leucine</i>    | 57                                |
| 9                  | <i>L-tert-leucine</i>       | 65 <sup>c</sup>                   |
| 10                 | <i>L-tert-leucine</i>       | 57 <sup>d</sup>                   |
| 11                 | AcNH <sub>4</sub>           | 36 <sup>e</sup> , 42 <sup>f</sup> |
| 12                 | <i>t</i> -BuNH <sub>2</sub> | 28 <sup>e</sup> , 34 <sup>f</sup> |
| 13                 | BnNH <sub>2</sub>           | 19 <sup>e</sup> , 14 <sup>f</sup> |
| 14                 | AcNH <sub>4</sub>           | N.D. <sup>h</sup>                 |
| 15                 | <i>t</i> -BuNH <sub>2</sub> | N.D. <sup>h</sup>                 |
| 16                 | BnNH <sub>2</sub>           | N.D. <sup>h</sup>                 |

<sup>a</sup> Reactions conditons: **1** (0.2 mmol), **2** (0.3 mmol), Amino acid (0.2 mmol), Pd(OAc)<sub>2</sub> (0.02 mmol), AgTFA (0.4 mmol), MnO<sub>2</sub> (0.4 mmol), AcOH (0.8 mmol), HFIP (1 mL), 110 °C, 24 h. <sup>b</sup> Isolated yield by flash column chromatography. <sup>c</sup> 1.2 equiv of *L-tert-leucine*. <sup>d</sup> 1.5 equiv of *L-tert-leucine*. <sup>e</sup> 30 mol% of *L-tert-leucine* was used. <sup>f</sup> 1

equiv of *L-tert-leucine* was used. <sup>g</sup> 10% yield of **B** was obtained.<sup>h</sup> 0.2 mmol amine was used.

### Screening of Solvent

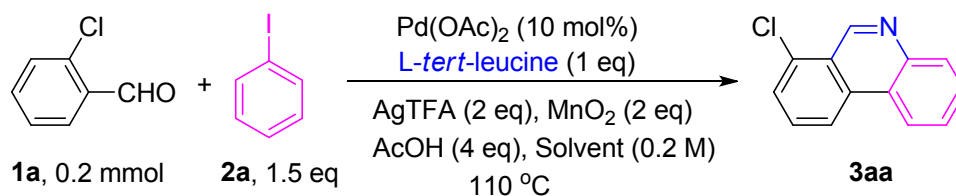

| Entry <sup>a</sup> | Solvent              | Yield (%) <sup>b</sup> |
|--------------------|----------------------|------------------------|
| 1                  | HFIP                 | 66                     |
| 2                  | TFE                  | 43                     |
| 3                  | 1,4-dioxane          | N.D                    |
| 4                  | toluene              | N.D                    |
| 5                  | DCE                  | trace                  |
| 6                  | MeCN                 | N.D                    |
| 7                  | MeOH                 | trace                  |
| 8                  | AcOH                 | trace                  |
| 9                  | THF                  | trace                  |
| 10                 | DMSO                 | N.D.                   |
| 11                 | HFIP/TFE (v/v = 1:1) | 48                     |

<sup>a</sup> Reactions conditions: **1** (0.2 mmol), **2** (0.3 mmol), *L-tert-leucine* (0.2 mmol), Pd(OAc)<sub>2</sub> (0.02 mmol), AgTFA (0.4 mmol), MnO<sub>2</sub> (0.4 mmol), AcOH (0.8 mmol), Solvent (1 mL), 110 °C, 24

h. <sup>b</sup> Isolated yield by flash column chromatography.

### Screening of [Ag]

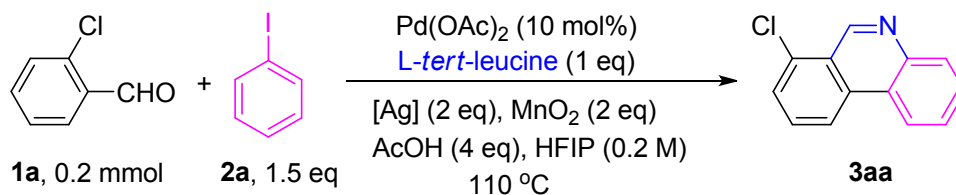

| Entry <sup>a</sup> | [Ag]                            | Yield (%) <sup>b</sup> |
|--------------------|---------------------------------|------------------------|
| 1                  |                                 | 5                      |
| 2                  | AgTFA                           | 66                     |
| 3                  | Ag <sub>2</sub> CO <sub>3</sub> | 55                     |
| 4                  | AgOAc                           | 42                     |
| 5                  | Ag <sub>2</sub> O               | 21                     |
| 6                  | AgNO <sub>3</sub>               | 49                     |
| 7                  | AgOTf                           | 57                     |
| 8                  | AgF                             | 44                     |
| 9                  | AgTFA                           | 57 <sup>c</sup>        |
| 10                 | AgTFA                           | 50 <sup>d</sup>        |

<sup>a</sup> Reactions conditions: **1** (0.2 mmol), **2** (0.3 mmol), L-tert-leucine (0.2 mmol), Pd(OAc)<sub>2</sub> (0.02 mmol), [Ag] (0.4 mmol), MnO<sub>2</sub> (0.4 mmol), AcOH (0.8 mmol), HFIP (1 mL), 110 °C, 24 h. <sup>b</sup>

Isolated yield by flash column chromatography. <sup>c</sup> 1.2 equiv of AgTFA. <sup>d</sup> 1.5 equiv of AgTFA.

### Screening of Oxidant

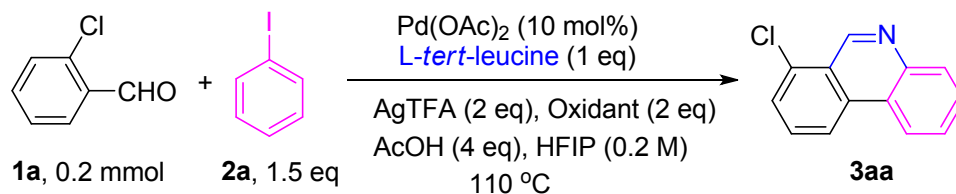

| Entry <sup>a</sup> | Oxidant                                 | Yield (%) <sup>b</sup> |
|--------------------|-----------------------------------------|------------------------|
| 1                  | /                                       | N.D.                   |
| 2                  | Mn(acac) <sub>2</sub>                   | N.D.                   |
| 3                  | Mn(OAc) <sub>2</sub> ·4H <sub>2</sub> O | 26                     |
| 4                  | Mn(OAc) <sub>3</sub> ·2H <sub>2</sub> O | 61                     |

|                 |                                               |       |
|-----------------|-----------------------------------------------|-------|
| 5               | MnO <sub>2</sub>                              | 66    |
| 6               | BQ                                            | 21    |
| 7               | PhI(OAc) <sub>2</sub>                         | N.D.  |
| 8               | Selectflour                                   | N.D.  |
| 9               | DDQ                                           | N.D.  |
| 10              | Na <sub>2</sub> S <sub>2</sub> O <sub>8</sub> | trace |
| 11              | K <sub>2</sub> S <sub>2</sub> O <sub>8</sub>  | trace |
| 12              | Oxone                                         | N.D.  |
| 13              | Cu(OAc) <sub>2</sub>                          | 23    |
| 14              | CuO                                           | 21    |
| 15 <sup>c</sup> | MnO <sub>2</sub>                              | 33    |
| 16 <sup>d</sup> | MnO <sub>2</sub>                              | 64    |

<sup>a</sup> Reactions conditons: **1** (0.2 mmol), **2** (0.3 mmol), *L*-*tert*-leucine (0.2 mmol), Pd(OAc)<sub>2</sub> (0.02 mmol), AgTFA (0.4 mmol), Oxidant (0.4 mmol), AcOH (0.8 mmol), HFIP (1 mL), 110 °C, 24 h.

<sup>b</sup> Isolated yield by flash column chromatography. <sup>c</sup> 1.0 equiv of MnO<sub>2</sub>. <sup>d</sup> 4.0 equiv of MnO<sub>2</sub>.

### Screening of Additive

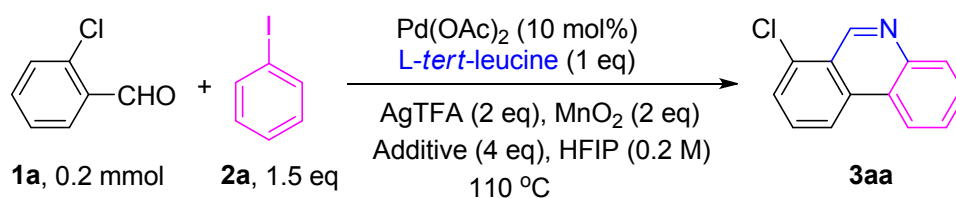

| Entry <sup>a</sup> | Additive                                                     | Yield (%) <sup>b</sup> |
|--------------------|--------------------------------------------------------------|------------------------|
| 1                  | /                                                            | 16                     |
| 2                  | AcOH                                                         | 66                     |
| 3                  | PivOH                                                        | 47                     |
| 4                  | TFA                                                          | trace                  |
| 5                  | TsOH·H <sub>2</sub> O                                        | trace                  |
| 6                  | <i>o</i> -ClC <sub>6</sub> H <sub>4</sub> COOH               | 52                     |
| 7                  | <i>o</i> -CH <sub>3</sub> C <sub>6</sub> H <sub>4</sub> COOH | 52                     |
| 8                  | PhCOOH                                                       | 51                     |

|    |                                                        |                 |
|----|--------------------------------------------------------|-----------------|
| 9  | 3,4-F <sub>2</sub> C <sub>6</sub> H <sub>3</sub> COOH  | 46              |
| 10 | 2,4-Cl <sub>2</sub> C <sub>6</sub> H <sub>3</sub> COOH | 42              |
| 11 | <i>m</i> -CPBA                                         | trace           |
| 12 | KH <sub>2</sub> PO <sub>4</sub>                        | trace           |
| 13 | K <sub>3</sub> PO <sub>4</sub>                         | trace           |
| 14 | AcOH                                                   | 54 <sup>c</sup> |
| 15 | AcOH                                                   | 61 <sup>d</sup> |

<sup>a</sup> Reactions conditons: **1** (0.2 mmol), **2** (0.3 mmol), *L*-*tert*-leucine (0.2 mmol), Pd(OAc)<sub>2</sub> (0.02 mmol), AgTFA (0.4 mmol), MnO<sub>2</sub> (0.4 mmol), Additive (0.8 mmol), HFIP (1 mL), 110 °C, 24 h. <sup>b</sup> Isolated yield by flash column chromatography. <sup>c</sup> 2 equiv of AcOH. <sup>d</sup> 6 equiv of AcOH.

### Screening of Temperature

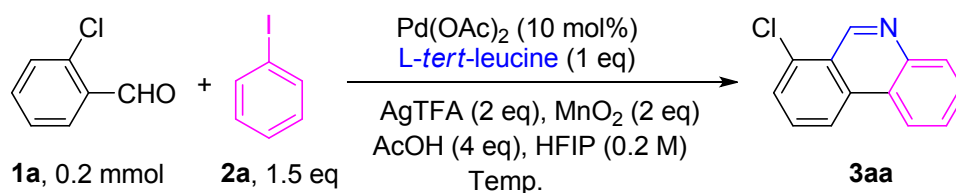

| Entry <sup>a</sup> | T (°C) | Yield (%) <sup>b</sup> |
|--------------------|--------|------------------------|
| 1                  | 100    | 41                     |
| 2                  | 110    | 66                     |
| 3                  | 120    | 59                     |

<sup>a</sup> Reactions conditons: **1** (0.2 mmol), **2** (0.3 mmol), *L*-*tert*-leucine (0.2 mmol), Pd(OAc)<sub>2</sub> (0.02 mmol), AgTFA (0.4 mmol), MnO<sub>2</sub> (0.4 mmol), AcOH (0.8 mmol), HFIP (1 mL), Temp., 24 h. <sup>b</sup> Isolated yield by flash column chromatography.

### Screening of Reaction Time

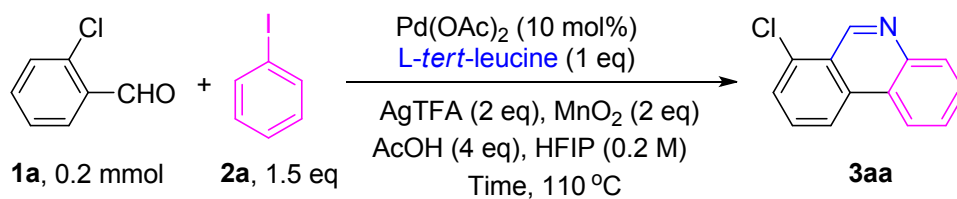

| Entry <sup>a</sup> | Time (h) | Yield (%) <sup>b</sup> |
|--------------------|----------|------------------------|
| 1                  | 15       | 40                     |
| 2                  | 24       | 66                     |
| 3                  | 36       | 62                     |
| 4                  | 48       | 60                     |

<sup>a</sup> Reactions conditons: **1** (0.2 mmol), **2** (0.3 mmol), *L-tert-leucine* (0.2 mmol),  $\text{Pd(OAc)}_2$  (0.02 mmol),  $\text{AgTFA}$  (0.4 mmol),  $\text{MnO}_2$  (0.4 mmol),  $\text{AcOH}$  (0.8 mmol), HFIP (1 mL), 110 °C, Time. <sup>b</sup> Isolated yield by flash column chromatography.

**Table S1 Optimization of reaction conditions<sup>a</sup>**

$\text{Pd(OAc)}_2$  (10 mol%)  
*L-tert-leucine* (1 eq)  
 $\text{Ag Salt}$ , Oxidant (2 eq)  
 Additive (4 eq), HFIP  
 110 °C

| Entry | Ag Salt                  | Oxidant                                      | Additive      | Yield (%) <sup>b</sup> |
|-------|--------------------------|----------------------------------------------|---------------|------------------------|
| 1     | $\text{AgOAc}$           | $\text{MnO}_2$                               | $\text{AcOH}$ | 42                     |
| 2     | $\text{Ag}_2\text{CO}_3$ | $\text{MnO}_2$                               | $\text{AcOH}$ | 55                     |
| 3     | $\text{Ag}_2\text{O}$    | $\text{MnO}_2$                               | $\text{AcOH}$ | 21                     |
| 4     | $\text{AgNO}_3$          | $\text{MnO}_2$                               | $\text{AcOH}$ | 49                     |
| 5     | $\text{AgOTf}$           | $\text{MnO}_2$                               | $\text{AcOH}$ | 57                     |
| 6     | $\text{AgF}$             | $\text{MnO}_2$                               | $\text{AcOH}$ | 44                     |
| 7     | $\text{AgTFA}$           | $\text{MnO}_2$                               | $\text{AcOH}$ | 66                     |
| 8     | $\text{AgTFA}$           | $\text{MnO}_2$                               | $\text{AcOH}$ | 64 <sup>c</sup>        |
| 9     | $\text{AgTFA}$           | $\text{Mn(acac)}_2$                          | $\text{AcOH}$ | N.D.                   |
| 10    | $\text{AgTFA}$           | $\text{Mn(OAc)}_2 \cdot 4\text{H}_2\text{O}$ | $\text{AcOH}$ | 26                     |



|    |       |                                               |                       |       |
|----|-------|-----------------------------------------------|-----------------------|-------|
| 11 | AgTFA | Mn(OAc) <sub>3</sub> ·2H <sub>2</sub> O       | AcOH                  | 61    |
| 12 | AgTFA | BQ                                            | AcOH                  | 21    |
| 13 | AgTFA | PhI(OAc) <sub>2</sub>                         | AcOH                  | N.D.  |
| 14 | AgTFA | Na <sub>2</sub> S <sub>2</sub> O <sub>8</sub> | AcOH                  | Trace |
| 15 | AgTFA | K <sub>2</sub> S <sub>2</sub> O <sub>8</sub>  | AcOH                  | Trace |
| 16 | AgTFA | Cu(OAc) <sub>2</sub>                          | AcOH                  | 23    |
| 17 | AgTFA | CuO                                           | AcOH                  | 21    |
| 18 | AgTFA | MnO <sub>2</sub>                              | TFA                   | Trace |
| 19 | AgTFA | MnO <sub>2</sub>                              | TsOH·H <sub>2</sub> O | Trace |
| 20 | AgTFA | MnO <sub>2</sub>                              | PivOH                 | 47    |
| 21 | AgTFA | MnO <sub>2</sub>                              | PhCO <sub>2</sub> H   | 51    |

<sup>a</sup> Reactions conditions: **1a** (0.2 mmol), **2a** (0.3 mmol), *L-tert*-leucine (0.2 mmol), Pd(OAc)<sub>2</sub> (0.02 mmol), Ag Sat (0.4 mmol), Oxidant (0.4 mmol), Additive (0.8 mmol), HFIP (1 mL), 110 °C, 24 h. <sup>b</sup> Isolated yield by flash column chromatography. <sup>c</sup> Under argon atmosphere.

### 3. General procedure for synthesis of phenanthridine

A mixture of aldehyde substrates (**1**, 0.2 mmol), aryl iodide (**2**, 0.3 mmol), *L-tert*-leucine (0.2 mmol), Pd(OAc)<sub>2</sub> (0.02 mmol), AgTFA (0.4 mmol), MnO<sub>2</sub> (**fresh**) (0.4 mmol), AcOH (0.8 mmol) and HFIP (1.0 mL) was added to a 15 mL sealed tube. The tube was stirred at 110 °C for 24 h. Then, the reaction mixture was cooled to room temperature. The mixture was filtered through Celite®, and the filter cake was rinsed with EtOAc. The combined organic was removed in vacuo. Then the mixture was subjected to column chromatography on silica gel to give the desired product.

### 4. Gram-scale preparation of **3aa** and competition experiment

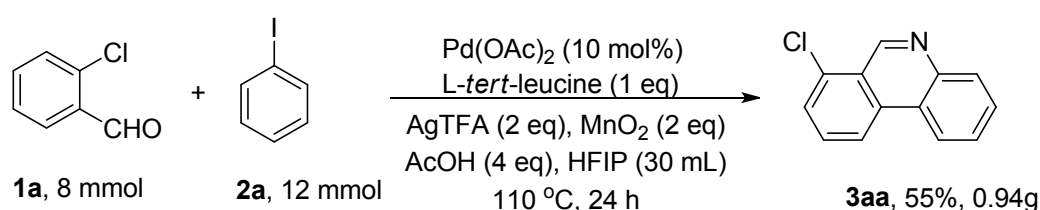

A 75 mL Schlenk tube was charged with *o*-chlorobenzaldehyde **1a** (8 mmol), **2a** (12 mmol), *L*-*tert*-leucine (8 mmol) and Pd(OAc)<sub>2</sub> (0.8 mmol), AgTFA (16 mmol), MnO<sub>2</sub> (**fresh**) (16 mmol). The mixture was dissolved in 30 mL HFIP followed by addition of AcOH (32 mmol). The reaction mixture was stirred for 24 hours at 110 °C. After that it was filtered through a short pad of Celite® and washed with ethyl acetate. The solvent was then evaporated under reduced pressure and the crude was purified by column chromatography on silica gel to afford the pure product **3aa** (0.94 g, 55% isolated yield).

## 5. Control experiments

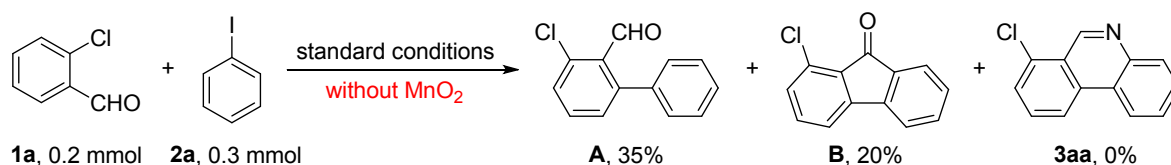

A 15 mL Schlenk tube was charged with *o*-chlorobenzaldehyde **1a** (0.2 mmol), **2a** (1.5 mmol), *L*-*tert*-leucine (1.0 mmol) and Pd(OAc)<sub>2</sub> (0.02 mmol), AgTFA (0.4 mmol). The mixture was dissolved in 1 mL HFIP followed by addition of AcOH (0.8 mmol). The reaction mixture was stirred for 24 hours at 110 °C. After that it was filtered through a short pad of Celite® and washed with ethyl acetate. The solvent was then evaporated under reduced pressure and the crude was purified by column chromatography on silica gel to afford the pure product **A** and **B**.

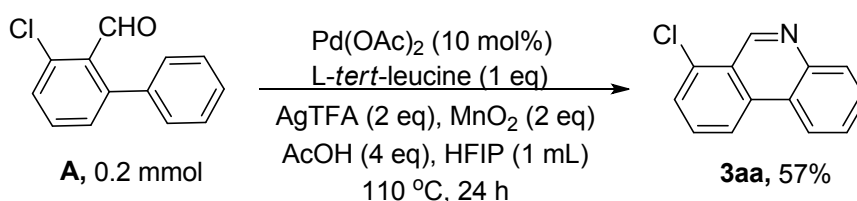

A 15 mL Schlenk tube was charged with biphenyl aldehyde **A** (0.2 mmol), *L*-*tert*-leucine (0.2 mmol) and Pd(OAc)<sub>2</sub> (0.02 mmol), AgTFA (0.4 mmol), MnO<sub>2</sub> (**fresh**) (0.4 mmol). The mixture was dissolved in 1 mL HFIP followed by addition of AcOH (0.8 mmol). The reaction mixture was stirred for 24 hours at 110 °C. After that it was filtered through a short pad of Celite® and washed with ethyl acetate. The solvent was then evaporated under reduced pressure and the crude was purified by column chromatography on silica gel to

afford the pure product **3aa** (57% isolated yield).

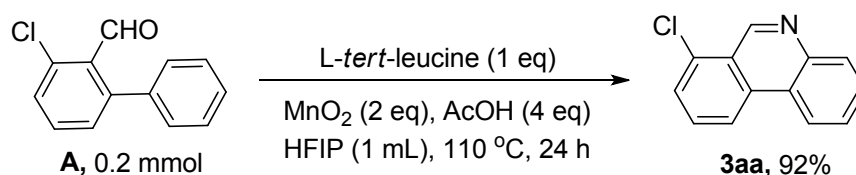

A mixture of biphenyl aldehyde **A** (0.2 mmol), *L-tert-leucine* (0.2 mmol),  $\text{MnO}_2$  (fresh) (0.4 mmol), AcOH (0.8 mmol) and HFIP (1.0 mL) was added to a 15 mL sealed tube. The tube was stirred at 110 °C for 24 h. Then, the reaction mixture was cooled to room temperature. The mixture was filtered through Celite®, and the filter cake was rinsed with EtOAc. The solvent was then evaporated under reduced pressure and the crude was purified by column chromatography on silica gel to afford the pure product **3aa** (92% isolated yield).

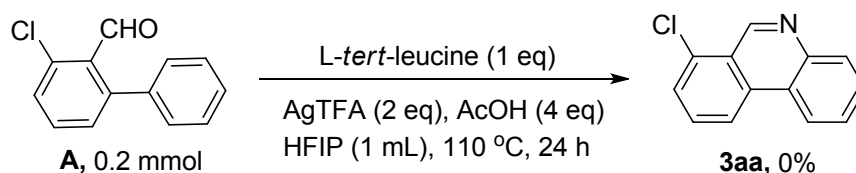

A mixture of biphenyl aldehyde **A** (0.2 mmol), *L-tert-leucine* (0.2 mmol), AgTFA (0.4 mmol), AcOH (0.8 mmol) and HFIP (1.0 mL) was added to a 15 mL sealed tube. The tube was stirred at 110 °C for 24 h. Then, the reaction mixture was cooled to room temperature. And no **3aa** was detected by TLC.

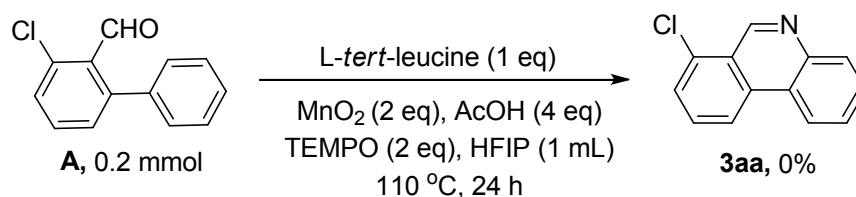

A mixture of biphenyl aldehyde **A** (0.2 mmol), *L-tert-leucine* (0.2 mmol), TEMPO (0.4 mmol),  $\text{MnO}_2$  (fresh) (0.4 mmol), AcOH (0.8 mmol) and HFIP (1.0 mL) was added to a 15 mL sealed tube. The tube was stirred at 110 °C for 24 h. Then, the reaction mixture was cooled to room temperature. And no **3aa** was detected by TLC.

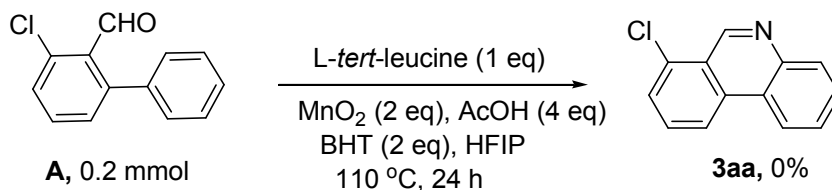

A mixture of biphenyl aldehyde **A** (0.2 mmol), *L-tert-leucine* (0.2 mmol), BHT (0.4 mmol), MnO<sub>2</sub> (**fresh**) (0.4 mmol), AcOH (0.8 mmol) and HFIP (1.0 mL) was added to a 15 mL sealed tube. The tube was stirred at 110 °C for 24 h. Then, the reaction mixture was cooled to room temperature. And no **3aa** was detected by TLC.

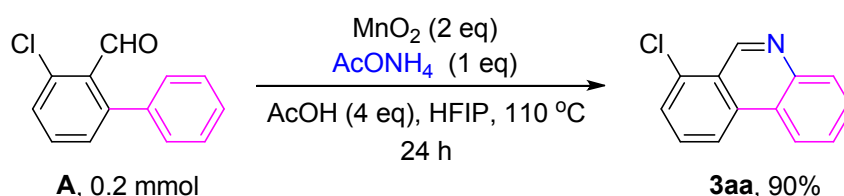

A mixture of biphenyl aldehyde **A** (0.2 mmol), AcONH<sub>4</sub> (0.2 mmol), MnO<sub>2</sub> (**fresh**) (0.4 mmol), AcOH (0.8 mmol) and HFIP (1.0 mL) was added to a 15 mL sealed tube. The tube was stirred at 110 °C for 24 h. Then, the reaction mixture was cooled to room temperature. The mixture was filtered through Celite®, and the filter cake was rinsed with EtOAc. The solvent was then evaporated under reduced pressure and the crude was purified by column chromatography on silica gel to afford the pure product **3aa** (90% isolated yield).

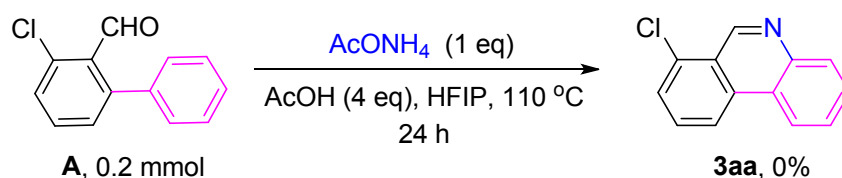

A mixture of biphenyl aldehyde **A** (0.2 mmol), AcONH<sub>4</sub> (0.2 mmol), AcOH (0.8 mmol) and HFIP (1.0 mL) was added to a 15 mL sealed tube. The tube was stirred at 110 °C for 24 h. Then, the reaction mixture was cooled to room temperature. And no **3aa** was detected by TLC.

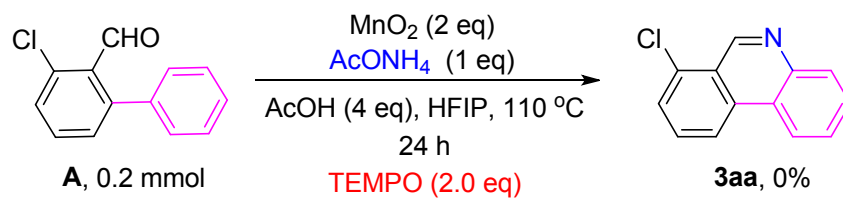

A mixture of biphenyl aldehyde **A** (0.2 mmol), AcONH<sub>4</sub> (0.2 mmol), TEMPO (0.4 mmol), MnO<sub>2</sub> (**fresh**) (0.4 mmol), AcOH (0.8 mmol) and HFIP (1.0 mL) was added to a 15 mL sealed tube. The tube was stirred at 110 °C for 24 h. Then, the reaction mixture was cooled to room temperature. And no **3aa** was detected by TLC.

## 6. GC-MS analysis

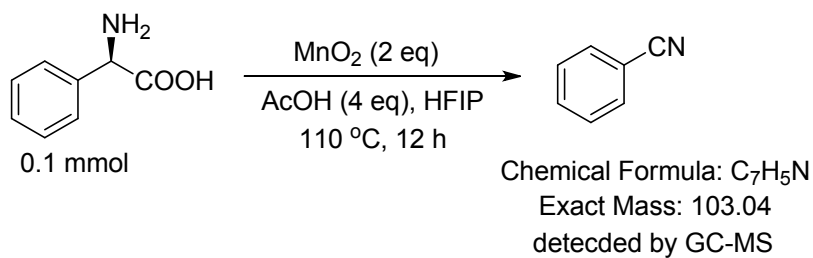

E:\ZIT\FanJian\20191215\2019121504

12/15/19 10:15:41

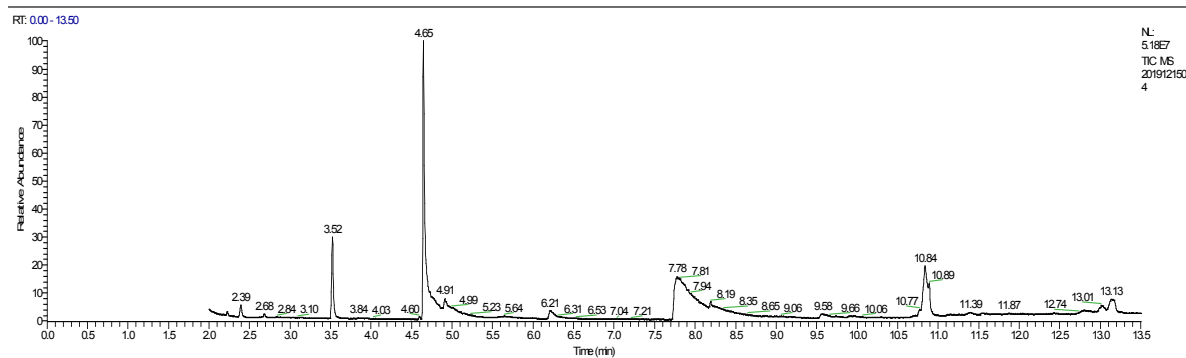

2019121504#666 RT: 4.91 AM: 1 N: 6.33E5  
T: +cEiFull.ms[50.00-500.00]

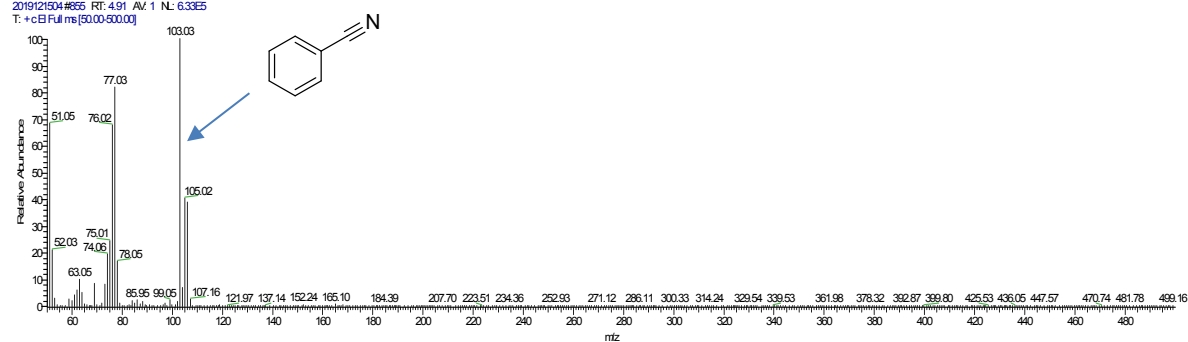

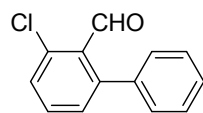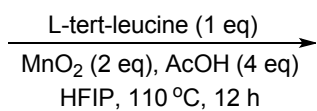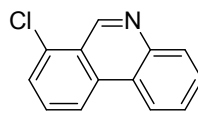

80%

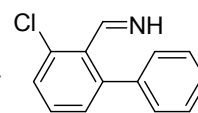

Chemical Formula:  $\text{C}_{13}\text{H}_{10}\text{ClN}$   
 Exact Mass: 215.05  
 detected by GC-MS

E:\Z\T\FanJan2019\2150219121503

12/15/19 09:57:23

RT: 8.36 - 10.94

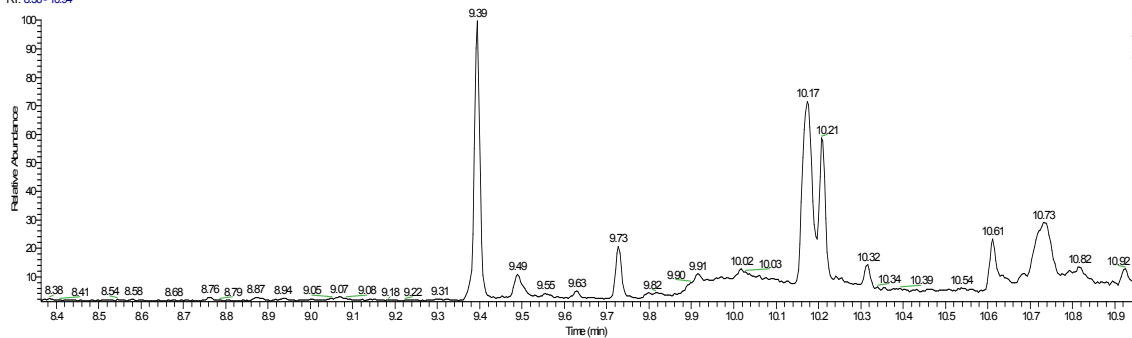

NL: 1.53E7  
 TIC MS  
 2019121503  
 3

2019121503#204 RT: 10.17 AM: 1 NL: 8.83E5  
 T: +cB Full ms [500-500.0]

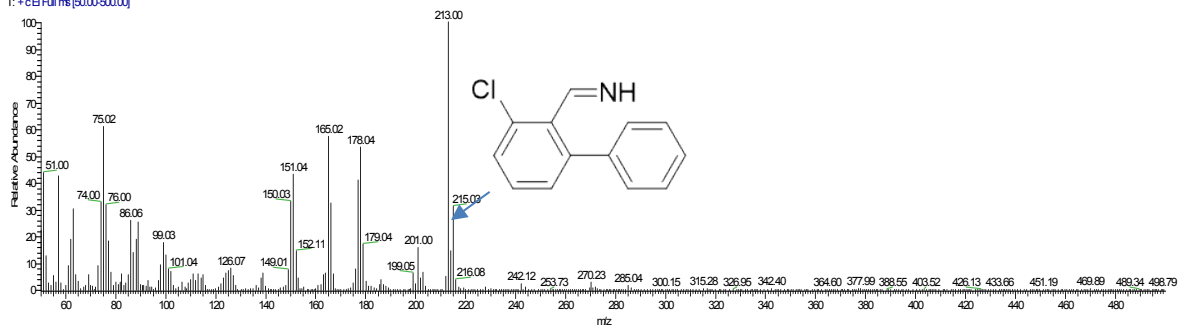

## 7. Deuteration Studies

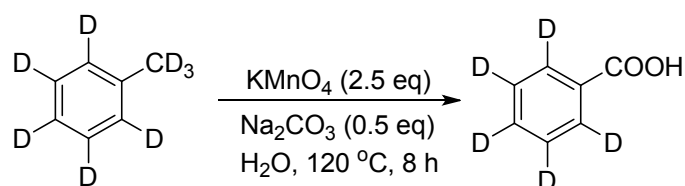

A round-bottom flask equipped with a stir bar and a condenser was charged with  $d_8$ -toluene (99.9 atom % D) (1 g, 10 mmol),  $\text{KMnO}_4$  (4 g, 25 mmol),  $\text{Na}_2\text{CO}_3$  (0.26 g, 5 mmol), and  $\text{H}_2\text{O}$  (30 mL). The reaction mixture was refluxed for 8 h and then cooled to room temperature. The mixture was filtered through a pad of celite, and the filtrate was acidified with 12 M HCl and extracted with DCM ( $3 \times 30$  mL). The organic layer was washed with water and concentrated in vacuo. The crude product was recrystallized from water to give  $\text{C}_6\text{D}_5\text{CO}_2\text{H}$  as white needle solid (0.64 g, 50% yield). Synthesis of  $\text{C}_6\text{D}_5\text{CO}_2\text{H}$  was prepared using a similar procedure (P. Gandeepan, P. Rajamalli, C. Cheng, *Angew. Chem. Int. Ed.*, 2016, **55**, 4308-4311).

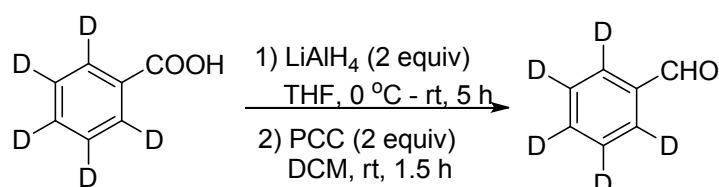

$[^2\text{H}_5]$ -Benzyl alcohol (0.45 g; 4 mmol) in  $\text{CH}_2\text{Cl}_2$  (2 mL) was slowly dropped into the solution of pyridinium chlorochromate (Sigma-Aldrich) (1.5 g; 6 mmol) and  $\text{CH}_2\text{Cl}_2$  (12 mL). The mixture which turned quickly from orange to black was stirred for 1.5 h. Diethyl ether (20 mL) was added, and the residue was further extracted with diethyl ether ( $3 \times 10$  mL) until the gummy residue became granular solid. The combined extracts were passed through dry Florisil® (Sigma-Aldrich) (10 g), and the solvent was removed by  $\text{N}_2$  gas to obtain  $[^2\text{H}_5]$ - benzaldehyde (80% yield, 85.1% purity) (L. Li, B. Zhou, Y.-H. Wang, C. Shu, Y.-F. Pan, X. Lu, L.-W. Ye, *Angew. Chem. Int. Ed.*, 2015, **54**, 8245–8249).

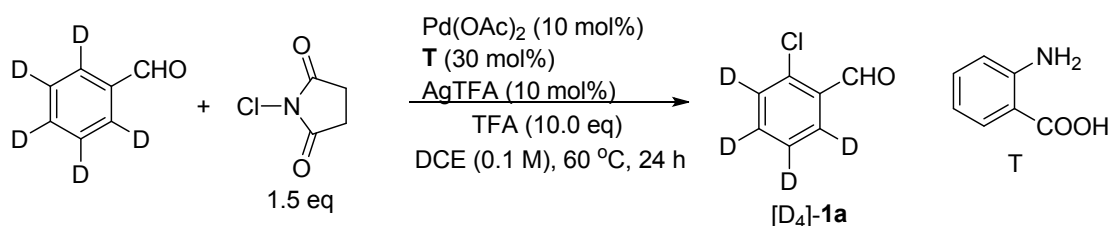

A sealed tube with magnetic stir bar was charged with  $[^2\text{H}_5]$ - benzaldehyde (0.3 mmol), NCS (0.45 mmol, 60.0 mg),  $\text{Pd}(\text{OAc})_2$  (0.03 mmol, 6.7 mg), **T** (0.09 mmol, 12.3 mg), and  $\text{AgTFA}$  (0.03 mmol, 6.6 mg) in air, followed by DCE (3.0 mL) and TFA (3.0 mmol, 342.0 mg). The reaction mixture was stirred at 60 °C for 24 hours. Upon completion, the reaction mixture was quenched by sat.  $\text{NaHCO}_3$  (aq) (30 mL), and extracted with DCM for 3 times. The combined organic layers were washed with water (50 mL), dried over anhydrous  $\text{Na}_2\text{SO}_4$ , and concentrated in vacuo. The crude residue was purified by column



chromatography on silica gel using petroleum ether/EtOAc (50:1) as eluent to afford the [D<sub>4</sub>]-**1a** (65% yield) (X.-H. Liu, H. Park, J.-H. Hu, Y. Hu, Q.-L. Zhang, B.-L. Wang, B. Sun, K.-S. Yeung, F.-L. Zhang, J.-Q. Yu, *J. Am. Chem. Soc.* 2017, **139**, 888–896).

A 15 mL Schlenk tube was charged with *o*-chlorobenzaldehyde **1a** (0.1 mmol), [D<sub>4</sub>]-**1a** (0.1 mmol), **2a** (1.5 mmol), *L*-*tert*-leucine (1.0 mmol) and Pd(OAc)<sub>2</sub> (0.02 mmol), AgTFA (0.4 mmol). The mixture was dissolved in 1 mL HFIP followed by addition of AcOH (0.8 mmol). The reaction mixture was stirred for 3 hours at 110 °C. After that it was filtered through a short pad of Celite® and washed with ethyl acetate. The solvent was then evaporated under reduced pressure and the crude was purified by column chromatography on silica gel to afford the pure arylation product, and the KIE was determined by <sup>1</sup>H NMR.

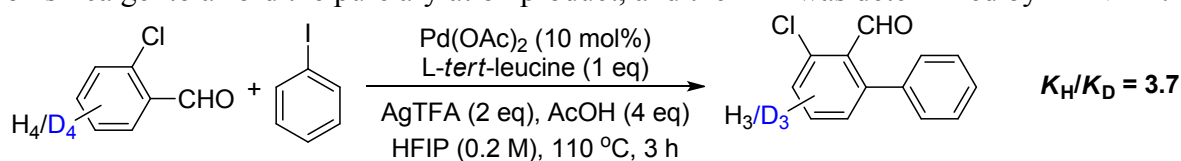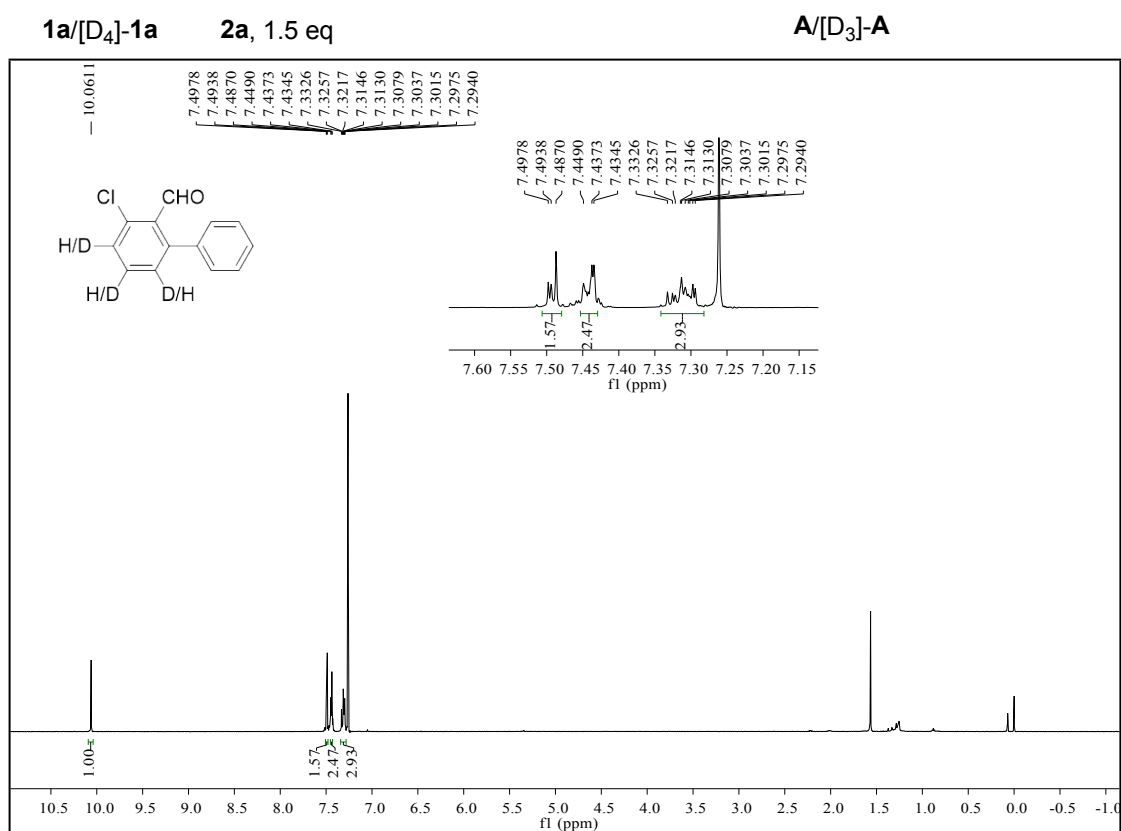

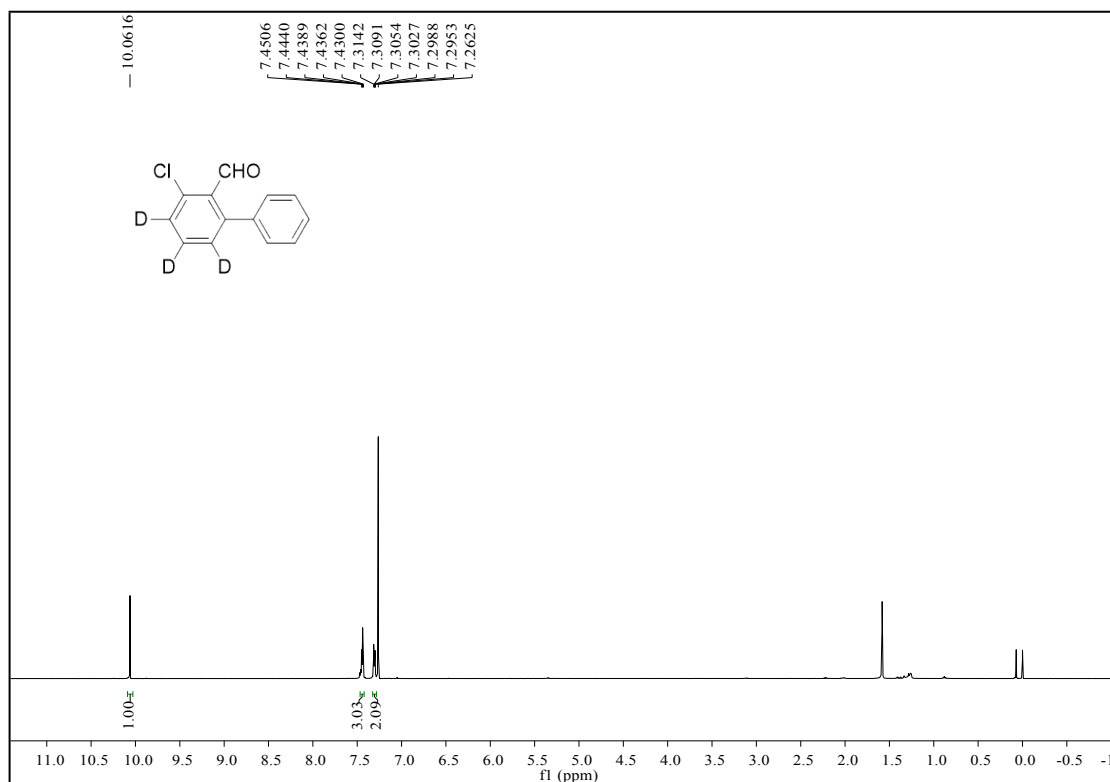

A 15 mL Schlenk tube was charged with  $[D_4]$ -**1a** (0.2 mmol), *L*-*tert*-leucine (1.0 mmol) and  $Pd(OAc)_2$  (0.02 mmol), AgTFA (0.4 mmol). The mixture was dissolved in 1 mL HFIP followed by addition of AcOH (0.8 mmol). The reaction mixture was stirred for 24 hours at 110 °C. After that it was filtered through a short pad of Celite® and washed with ethyl acetate. The solvent was then evaporated under reduced pressure and the aldehyde was recovered by column chromatography on silica gel and characterized by  $^1H$  NMR.

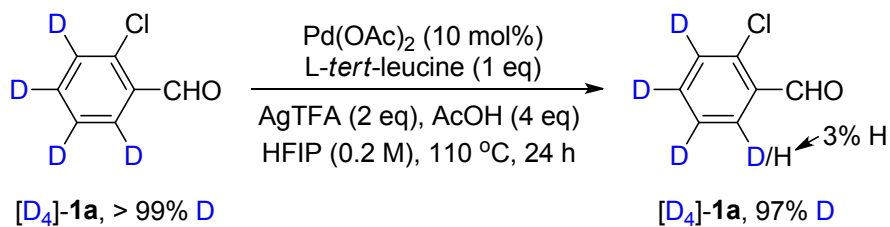

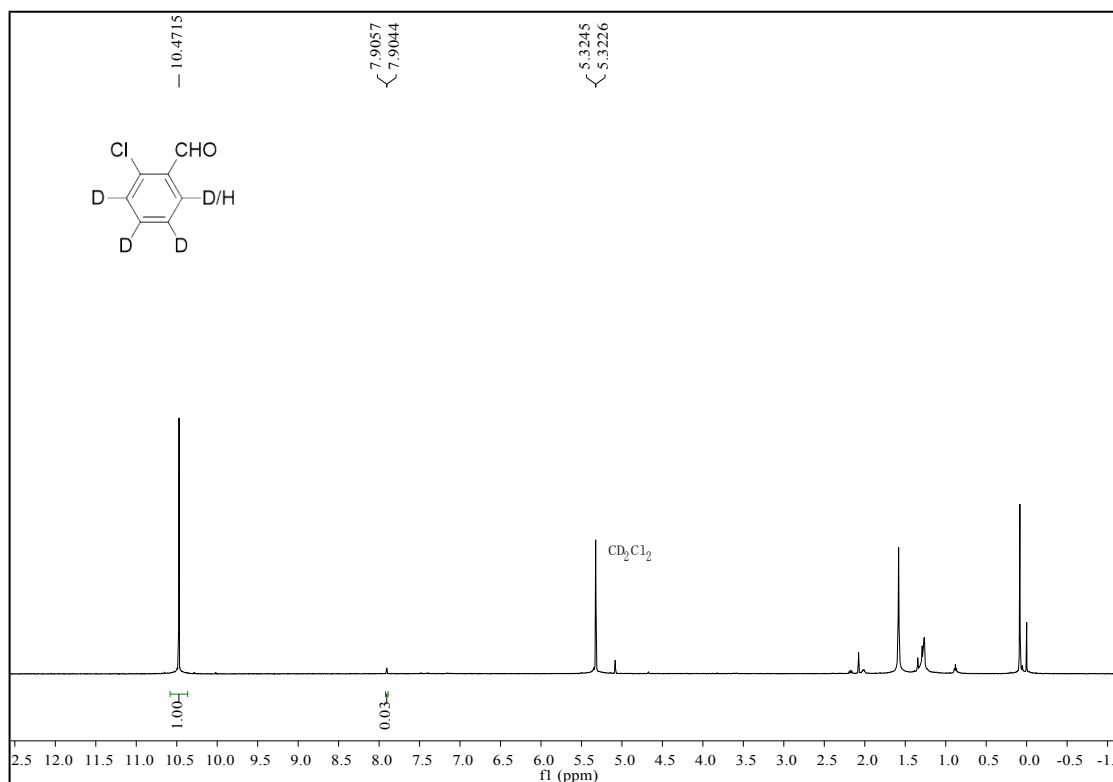

A mixture of biphenyl aldehyde **A** (0.1 mmol),  $[D_5]$ -**A** (0.1 mmol), *L*-*tert*-leucine (0.2 mmol),  $MnO_2$  (fresh) (0.4 mmol), AcOH (0.8 mmol) and HFIP (1.0 mL) was added to a 15 mL sealed tube. The tube was stirred at 110 °C for 3 h. Then, the reaction mixture was cooled to room temperature. The mixture was filtered through Celite®, and the filter cake was rinsed with EtOAc. The solvent was then evaporated under reduced pressure and the crude was purified by column chromatography on silica gel to afford the pure phenanthridine product, and the KIE was determined by  $^1H$  NMR.

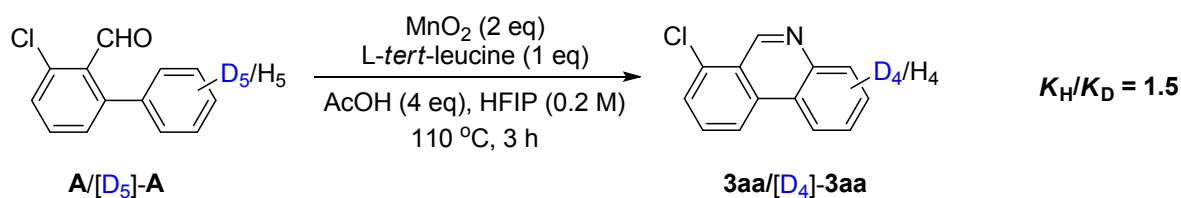

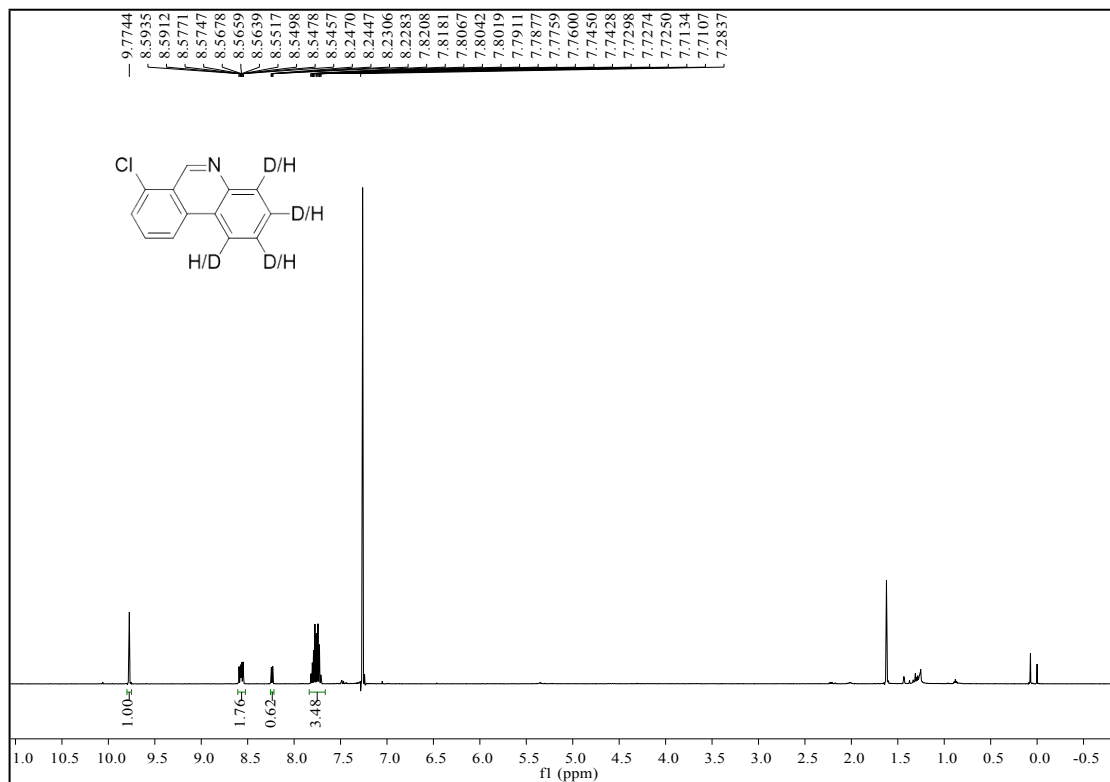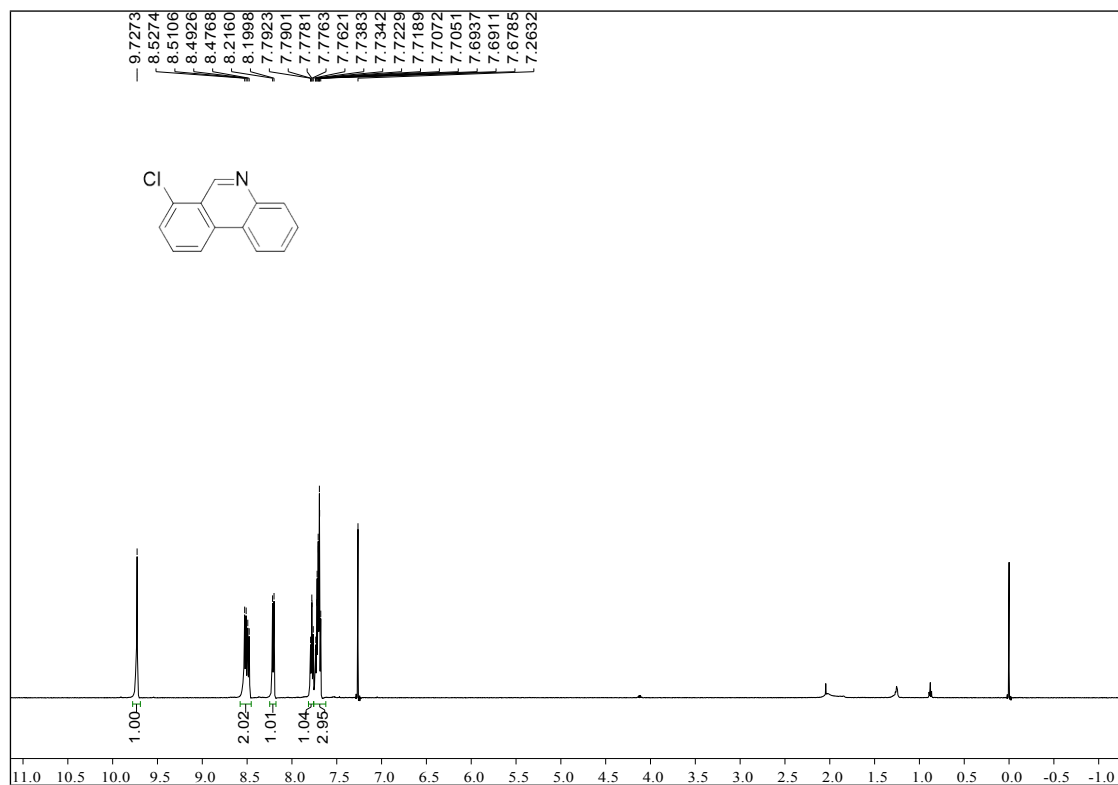

## 8. Proposed mechanism (Scheme S1)

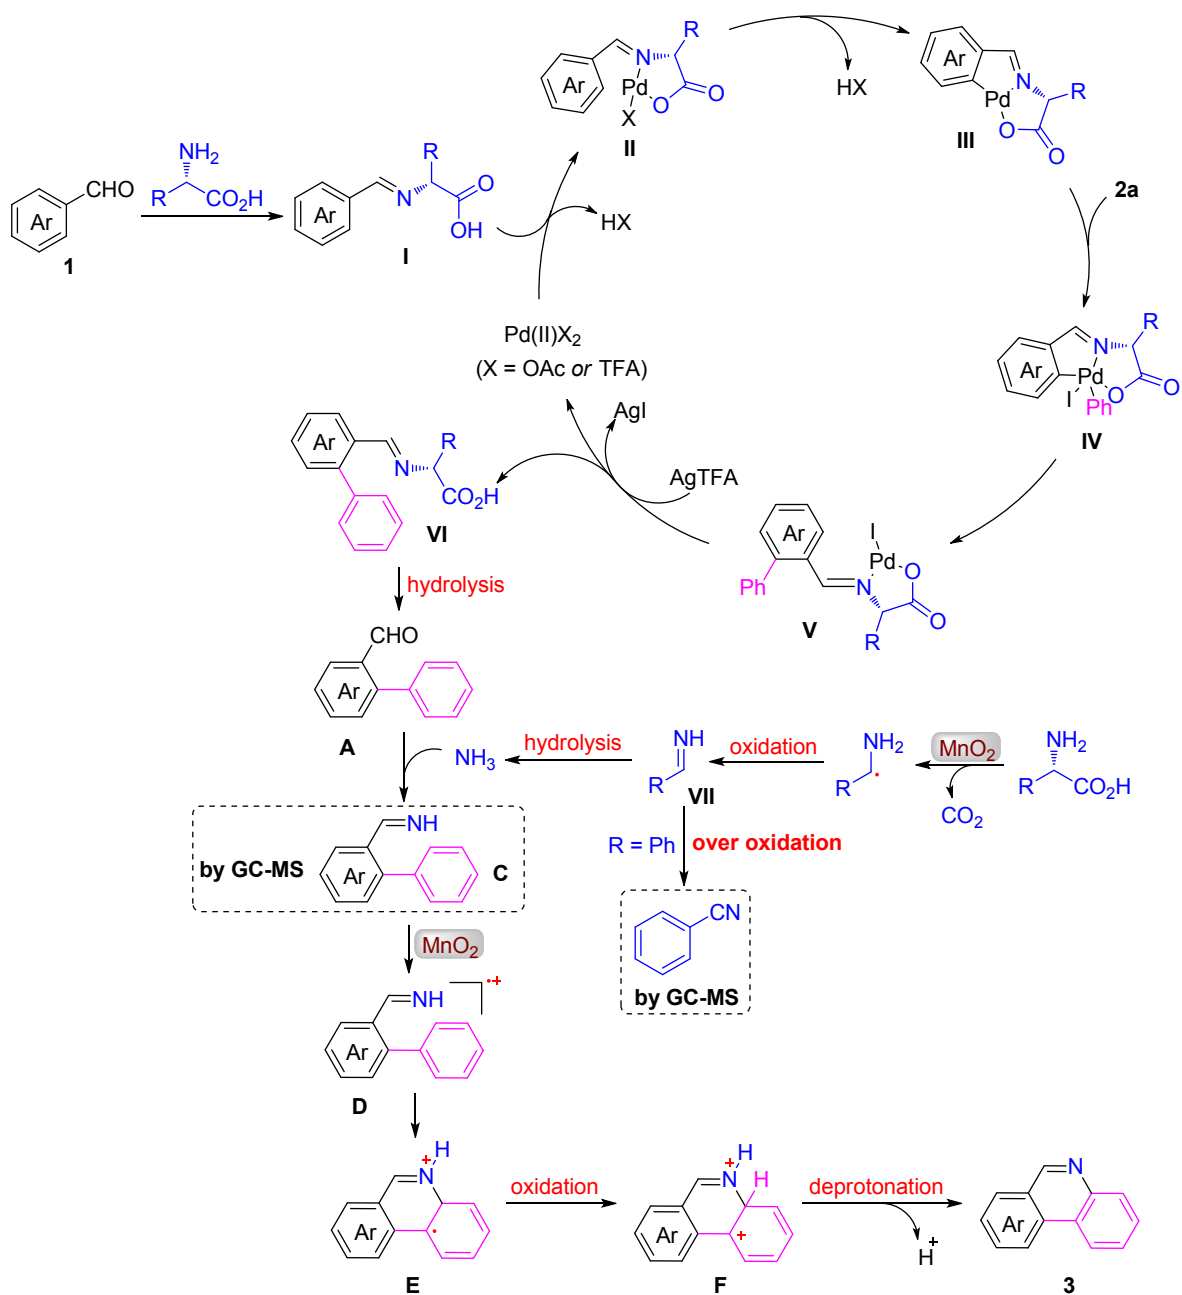

## Analytic Data of Products

### 7-fluorophenanthridine (3ba)

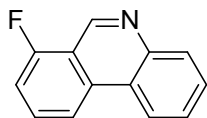

White solid. Isolated yield: 66%. Melting point: 90-91 °C.

**<sup>1</sup>H NMR** (500 MHz, CDCl<sub>3</sub>, TMS as the internal standard): δ 9.61 (s, 1H), 8.57-8.55 (m, 1H), 8.39 (d, *J* = 8.5 Hz, 1H), 8.23 (d, *J* = 8.2 Hz, 1H), 7.83-7.78 (m, 2H), 7.73-7.70 (m, 1H), 7.38-7.34 (m, 1H). **<sup>13</sup>C NMR** (125 MHz, CDCl<sub>3</sub>, CDCl<sub>3</sub> as the internal standard): δ 160.6 (*J*<sub>F-C</sub> = 254.0 Hz), 146.8 (*J*<sub>F-C</sub> = 6.8 Hz), 144.9, 134.7 (*J*<sub>F-C</sub> = 3.2 Hz), 131.9 (*J*<sub>F-C</sub> = 8.9 Hz), 130.8, 129.7, 128.0, 123.5 (*J*<sub>F-C</sub> = 2.1 Hz), 122.9, 118.2 (*J*<sub>F-C</sub> = 4.3 Hz), 116.5 (*J*<sub>F-C</sub> = 13.9 Hz), 112.6 (*J*<sub>F-C</sub> = 19.4 Hz). **HRMS** (APCI) calcd for C<sub>13</sub>H<sub>9</sub>FN (M+H<sup>+</sup>): 198.0713, found: 198.0712.

### 7-chlorophenanthridine (3aa)

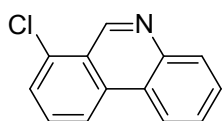

White solid. Isolated yield: 66%. Melting point: 95-96 °C.

**<sup>1</sup>H NMR** (500 MHz, CDCl<sub>3</sub>, TMS as the internal standard): δ 9.73 (s, 1H), 8.53-8.48 (m, 2H), 8.21 (d, *J* = 8.1 Hz, 1H), 7.79-7.76 (m, 1H), 7.74-7.68 (m, 3H). **<sup>13</sup>C NMR** (125 MHz, CDCl<sub>3</sub>, CDCl<sub>3</sub> as the internal standard): δ 150.0, 144.8, 134.7, 134.2, 131.3, 130.7, 129.7, 128.4, 128.0, 123.5, 123.46, 122.8, 121.3. **HRMS** (APCI) calcd for C<sub>13</sub>H<sub>9</sub>ClN (M+H<sup>+</sup>): 214.0418, found: 214.0416.

### 7-bromophenanthridine (3ca)

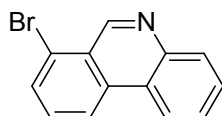

White solid. Isolated yield: 55%. Melting point: 151-152 °C.

**<sup>1</sup>H NMR** (500 MHz, CDCl<sub>3</sub>, TMS as the internal standard): δ 9.70 (s, 1H), 8.57 (t, *J* = 8.7 Hz, 2H), 8.39 (d, *J* = 8.1 Hz, 1H), 7.92 (d, *J* = 7.6 Hz, 1H), 7.80 (t, *J* = 7.2 Hz, 1H), 7.73-

7.66 (m, 2H).  $^{13}\text{C}$  NMR (125 MHz,  $\text{CDCl}_3$ ,  $\text{CDCl}_3$  as the internal standard):  $\delta$  152.6, 144.8, 135.0, 132.1, 131.7, 130.7, 129.8, 128.0, 124.7, 124.5, 123.4, 122.7, 122.0. HRMS (APCI) calcd for  $\text{C}_{13}\text{H}_9\text{BrN}$  ( $\text{M}+\text{H}^+$ ): 257.9912, found: 257.9910.

### 7-methylphenanthridine (3da)

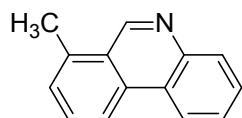

White solid. Isolated yield: 31%. Melting point: 72-73 °C.

$^1\text{H}$  NMR (500 MHz,  $\text{CDCl}_3$ , TMS as the internal standard):  $\delta$  9.57 (s, 1H), 8.60 (d,  $J = 8.1$  Hz, 1H), 8.50 (d,  $J = 8.3$  Hz, 1H), 8.21-8.19 (m, 1H), 7.77-7.73 (m, 2H), 7.70-7.67 (m, 1H), 7.51-7.50 (m, 1H), 2.89 (s, 3H).  $^{13}\text{C}$  NMR (125 MHz,  $\text{CDCl}_3$ ,  $\text{CDCl}_3$  as the internal standard):  $\delta$  150.7, 144.5, 137.0, 133.2, 131.1, 130.4, 129.2, 129.0, 127.4, 125.3, 124.7, 122.8, 120.4, 19.3. HRMS (APCI) calcd for  $\text{C}_{14}\text{H}_{12}\text{N}$  ( $\text{M}+\text{H}^+$ ): 194.0964, found: 194.0961.

### 8-chlorophenanthridine (3ea)

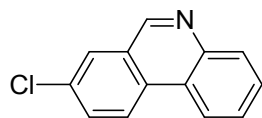

White solid. Isolated yield: 57%. Melting point: 84-85 °C.

$^1\text{H}$  NMR (500 MHz,  $\text{CDCl}_3$ , TMS as the internal standard):  $\delta$  9.21 (s, 1H), 8.53 (t,  $J = 8.0$  Hz, 2H), 8.19 (d,  $J = 8.15$  Hz, 1H), 8.03-8.02 (m, 1H), 7.81-7.75 (m, 2H), 7.72-7.69 (m, 1H).  $^{13}\text{C}$  NMR (125 MHz,  $\text{CDCl}_3$ ,  $\text{CDCl}_3$  as the internal standard):  $\delta$  152.7, 144.8, 133.7, 132.0, 131.3, 130.7, 129.5, 128.2, 128.0, 127.6, 124.2, 124.0, 122.5. HRMS (APCI) calcd for  $\text{C}_{13}\text{H}_9\text{ClN}$  ( $\text{M}+\text{H}^+$ ): 214.0418, found: 214.0415.

### 8-bromophenanthridine (3fa)

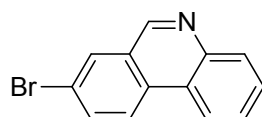

White solid. Isolated yield: 53%. Melting point: 72-73 °C.

$^1\text{H}$  NMR (500 MHz,  $\text{CDCl}_3$ , TMS as the internal standard):  $\delta$  9.20 (s, 1H), 8.52 (d,  $J = 9.2$  Hz, 1H), 8.46 (d,  $J = 8.8$  Hz, 1H), 8.20-8.18 (m, 2H), 7.94-7.9 (m, 1H), 7.79-7.76 (m, 1H),

7.72-7.68 (m, 1H).  $^{13}\text{C}$  NMR (125 MHz,  $\text{CDCl}_3$ ,  $\text{CDCl}_3$  as the internal standard):  $\delta$  152.6, 144.7, 134.6, 131.6, 131.4, 130.7, 129.5, 128.0, 127.9, 124.2, 124.0, 122.5, 121.7. HRMS (APCI) calcd for  $\text{C}_{13}\text{H}_9\text{BrN}$  ( $\text{M}+\text{H}^+$ ): 257.9912, found: 257.9908.

### 8-(trifluoromethyl)phenanthridine (3ga)

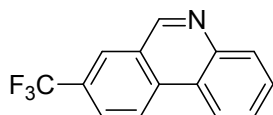

White solid. Isolated yield: 41%. Melting point: 118-119 °C.

$^1\text{H}$  NMR (500 MHz,  $\text{CDCl}_3$ , TMS as the internal standard):  $\delta$  9.39 (s, 1H), 8.76 (d,  $J = 8.6$  Hz, 1H), 8.63 (d,  $J = 8.1$  Hz, 1H), 8.38 (s, 1H), 8.29 (d,  $J = 7.9$  Hz, 1H), 8.09 (d,  $J = 8.7$  Hz, 1H), 7.86 (t,  $J = 7.4$  Hz, 1H), 7.78 (t,  $J = 7.6$  Hz, 1H).  $^{13}\text{C}$  NMR (100 MHz,  $\text{CDCl}_3$ ,  $\text{CDCl}_3$  as the internal standard):  $\delta$  153.1, 145.2, 134.7, 130.4, 130.0, 129.5 ( $J_{\text{F-C}} = 33.1$  Hz), 127.8, 126.8 ( $J_{\text{F-C}} = 3.1$  Hz), 126.2 ( $J_{\text{F-C}} = 4.2$  Hz), 125.6, 125.3, 123.2, 123.1, 122.6. HRMS (APCI) calcd for  $\text{C}_{14}\text{H}_9\text{F}_3\text{N}$  ( $\text{M}+\text{H}^+$ ): 248.0681, found: 248.0678.

### 8-methylphenanthridine (3ha)

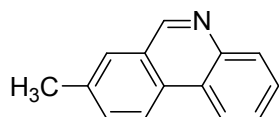

White solid. Isolated yield: 57%. Melting point: 139-140 °C.

$^1\text{H}$  NMR (500 MHz,  $\text{CDCl}_3$ , TMS as the internal standard):  $\delta$  9.21 (s, 1H), 8.53 (d,  $J = 8.1$  Hz, 1H), 8.48 (d,  $J = 8.35$  Hz, 1H), 8.18-8.16 (m, 1H), 7.80 (s, 1H). 7.73-7.64 (m, 3H), 2.59 (s, 3H).  $^{13}\text{C}$  NMR (125 MHz,  $\text{CDCl}_3$ ,  $\text{CDCl}_3$  as the internal standard):  $\delta$  153.8, 144.5, 137.9, 133.2, 130.4, 128.6, 128.56, 127.4, 127.0, 124.6, 122.5, 122.2, 21.9. HRMS (APCI) calcd for  $\text{C}_{14}\text{H}_{12}\text{N}$  ( $\text{M}+\text{H}^+$ ): 194.0964, found: 194.0960.

### 8-methoxyphenanthridine (3ia)

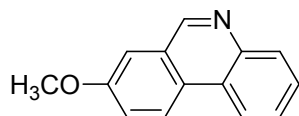

White solid. Isolated yield: 46%. Melting point: 92-93 °C.

$^1\text{H}$  NMR (500 MHz,  $\text{CDCl}_3$ , TMS as the internal standard):  $\delta$  9.24 (s, 1H), 8.52 (t,  $J = 9.6$



Hz, 2H), 8.17 (d,  $J = 7.85$  Hz, 1H), 7.71-7.65 (m, 2H), 7.34 (d,  $J = 8.7$  Hz, 1H), 7.39 (s, 1H), 4.00 (s, 3H).  $^{13}\text{C}$  NMR (125 MHz,  $\text{CDCl}_3$ ,  $\text{CDCl}_3$  as the internal standard):  $\delta$  159.3, 153.3, 144.0, 130.4, 128.1, 127.6, 127.4, 124.7, 124.0, 122.5, 122.2, 108.3, 56.0. HRMS (APCI) calcd for  $\text{C}_{14}\text{H}_{12}\text{NO}$  ( $\text{M}+\text{H}^+$ ): 210.0913, found: 210.0911.

### Phenanthridine (3ja)

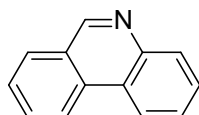

White solid. Isolated yield: 36%. Melting point: 93-94 °C.

$^1\text{H}$  NMR (500 MHz,  $\text{CDCl}_3$ , TMS as the internal standard):  $\delta$  9.29 (s, 1H), 8.61-8.57 (m, 2H), 8.20 (d,  $J = 8.0$  Hz, 1H), 8.04 (d,  $J = 7.9$  Hz, 1H), 7.86 (t,  $J = 8.0$  Hz, 1H), 7.77-7.67 (m, 3H);  $^{13}\text{C}$  NMR (125 MHz,  $\text{CDCl}_3$ ,  $\text{CDCl}_3$  as the internal standard):  $\delta$  153.6, 144.5, 132.6, 131.1, 130.2, 128.8, 128.7, 127.5, 127.1, 126.4, 124.1, 122.3, 121.9; HRMS (APCI) calcd for  $\text{C}_{13}\text{H}_{10}\text{N}$  ( $\text{M}+\text{H}^+$ ): 180.0807, found: 180.0804.

### 9-chlorophenanthridine (3ka)

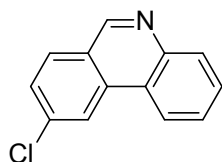

White solid. Isolated yield: 30%. Melting point: 89-90 °C.

$^1\text{H}$  NMR (500 MHz,  $\text{CDCl}_3$ , TMS as the internal standard):  $\delta$  9.27 (s, 1H), 8.59 (d,  $J = 1.5$  Hz, 1H), 8.52-8.50 (m, 1H), 8.26 (d,  $J = 8.1$  Hz, 1H), 8.04 (d,  $J = 8.5$  Hz, 1H), 7.83-7.79 (m, 1H), 7.76-7.69 (m, 2H).  $^{13}\text{C}$  NMR (125 MHz,  $\text{CDCl}_3$ ,  $\text{CDCl}_3$  as the internal standard):  $\delta$  153.1, 145.1, 137.9, 134.1, 130.7, 130.6, 139.8, 128.6, 127.8, 125.0, 123.4, 122.6, 121.1. HRMS (APCI) calcd for  $\text{C}_{13}\text{H}_9\text{ClN}$  ( $\text{M}+\text{H}^+$ ): 214.0418, found: 214.0416.

### 9-methylphenanthridine (3la)

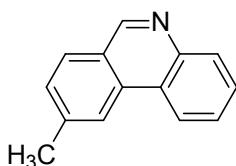

White solid. Isolated yield: 30%. Melting point: 88-89 °C.

**<sup>1</sup>H NMR** (500 MHz, CDCl<sub>3</sub>, TMS as the internal standard): δ 9.24 (s, 1H), 8.58-8.56 (m, 1H), 8.40 (s, 1H), 8.18-8.16 (m, 1H), 7.95 (d, *J* = 8.1 Hz, 1H), 7.75-7.72 (m, 1H), 7.68-7.65 (m, 1H), 7.55-7.53 (m, 1H), 2.66 (s, 3H). **<sup>13</sup>C NMR** (100 MHz, CDCl<sub>3</sub>, CDCl<sub>3</sub> as the internal standard): δ 153.3, 144.6, 132.7, 130.1, 128.7, 128.6, 126.9, 124.6, 124.0, 122.2, 121.6, 22.5. **HRMS** (APCI) calcd for C<sub>14</sub>H<sub>12</sub>N (M+H<sup>+</sup>): 194.0964, found: 194.0961.

### 7-phenylphenanthridine (3jaa)

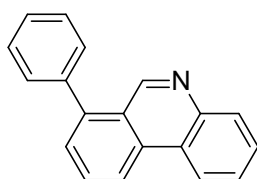

White solid. Isolated yield: 43%. Melting point: 195-196 °C.

**<sup>1</sup>H NMR** (500 MHz, CDCl<sub>3</sub>, TMS as the internal standard): δ 9.36 (s, 1H), 8.66-8.64 (m, 2H), 8.19-8.17 (m, 1H), 7.91-7.88 (m, 1H), 7.78-7.75 (m, 1H), 7.72-7.69 (m, 1H), 7.65-7.63 (m, 1H), 7.55-7.48 (m, 5H). **<sup>13</sup>C NMR** (100 MHz, CDCl<sub>3</sub>, CDCl<sub>3</sub> as the internal standard): δ 151.9, 144.1, 142.3, 138.9, 133.0, 130.4, 130.3, 130.1, 128.81, 128.8, 128.5, 128.0, 127.2, 124.0, 123.99, 122.4, 121.2. **HRMS** (APCI) calcd for C<sub>19</sub>H<sub>14</sub>N (M+H<sup>+</sup>): 256.1120, found: 256.1117.

### 9-chloro-7-phenylphenanthridine (3kaa)

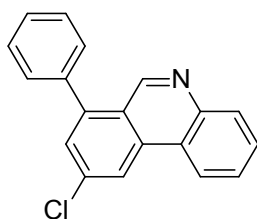

White solid. Isolated yield: 31%. Melting point: 120-121 °C.

**<sup>1</sup>H NMR** (500 MHz, CDCl<sub>3</sub>, TMS as the internal standard): δ 9.29 (s, 1H), 8.60 (d, *J* = 2.0 Hz, 1H), 8.55 (d, *J* = 7.9 Hz, 1H), 8.18-8.16 (m, 1H), 7.80-7.77 (m, 1H), 7.73-7.70 (m, 1H), 7.61 (d, *J* = 2.0 Hz, 1H), 7.57-7.50 (m, 5H). **<sup>13</sup>C NMR** (100 MHz, CDCl<sub>3</sub>, CDCl<sub>3</sub> as the internal standard): δ 151.3, 144.4, 144.1, 137.5, 136.7, 134.4, 130.2, 130.1, 129.5, 129.2,

128.7, 128.5, 127.5, 123.0, 122.5, 122.4, 120.8. **HRMS** (APCI) calcd for  $C_{19}H_{13}ClN$  ( $M+H^+$ ): 290.0731, found: 290.0728.

### 9-methyl-7-phenylphenanthridine (3laa)

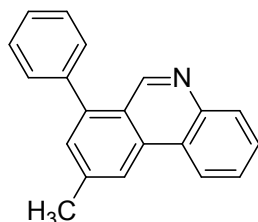

White solid. Isolated yield: 36%. Melting point: 174-175 °C.

**$^1H$  NMR** (500 MHz,  $CDCl_3$ , TMS as the internal standard):  $\delta$  9.30 (s, 1H), 8.63-8.61 (m, 1H), 8.43 (s, 1H), 8.17-8.15(m, 1H), 7.76-7.72 (m, 1H), 7.69-7.66 (m, 1H), 7.54-7.47 (m, 6H), 2.68 (s, 3H).  **$^{13}C$  NMR** (100 MHz,  $CDCl_3$ ,  $CDCl_3$  as the internal standard):  $\delta$  151.7, 144.3, 142.1, 140.8, 138.9, 133.2, 130.6, 130.3, 130.0, 128.7, 128.5, 127.9, 126.9, 123.9, 122.4, 122.2, 120.9, 22.4. **HRMS** (APCI) calcd for  $C_{20}H_{16}N$  ( $M+H^+$ ): 270.1277, found: 270.1274.

### 7-bromo-9-fluorophenanthridine (3ma)

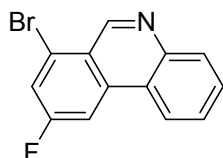

White solid. Isolated yield: 42%. Melting point: 161-162 °C.

**$^1H$  NMR** (500 MHz,  $CDCl_3$ , TMS as the internal standard):  $\delta$  9.64 (s, 1H), 8.45 (d,  $J = 9.0$  Hz, 1H), 8.24-8.21 (m, 2H), 7.84-7.81 (m, 1H), 7.75-7.72 (m, 2H).  **$^{13}C$  NMR** (125 MHz,  $CDCl_3$ ,  $CDCl_3$  as the internal standard):  $\delta$  163.3 ( $J_{F-C} = 253.9$  Hz), 151.8, 144.9, 136.4 ( $J_{F-C} = 9.6$  Hz), 130.6 ( $J_{F-C} = 42.8$  Hz), 128.1, 125.8 ( $J_{F-C} = 11.0$  Hz), 122.9 ( $J_{F-C} = 4.2$  Hz), 122.8, 121.9, 121.7, 121.49, 107.3 ( $J_{F-C} = 21.9$  Hz). **HRMS** (APCI) calcd for  $C_{13}H_8FBrN$  ( $M+H^+$ ): 275.9818, found: 275.9815.

### 7-bromo-9-methylphenanthridine (3na)

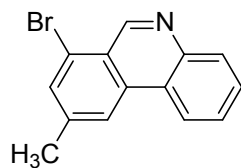

White solid. Isolated yield: 43%. Melting point: 145-146 °C.

**<sup>1</sup>H NMR** (500 MHz, CDCl<sub>3</sub>, TMS as the internal standard): δ 9.60 (s, 1H), 8.50-8.49 (m, 1H), 8.29 (s, 1H), 8.19-8.17 (m, 1H), 7.77-7.73 (m, 2H), 7.68-7.65 (m, 1H), 2.59 (s, 3H).

**<sup>13</sup>C NMR** (125 MHz, CDCl<sub>3</sub>, CDCl<sub>3</sub> as the internal standard): δ 152.2, 144.7, 142.6, 134.8, 133.6, 130.5, 129.6, 127.8, 124.2, 123.2, 122.8, 122.6, 121.7, 22.5. **HRMS** (APCI) calcd for C<sub>14</sub>H<sub>11</sub>BrN (M+H<sup>+</sup>): 272.0069, found: 272.0064.

### 7,10-dichlorophenanthridine (3oa)

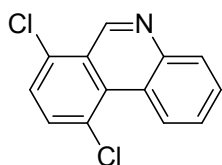

White solid. Isolated yield: 30%. Melting point: 188-189 °C.

**<sup>1</sup>H NMR** (500 MHz, CDCl<sub>3</sub>, TMS as the internal standard): δ 9.81 (d, *J* = 8.6 Hz, 1H), 9.78 (s, 1H), 8.26 (d, *J* = 8.1 Hz, 1H), 7.84 (t, *J* = 7.2 Hz, 2H), 7.73 (t, *J* = 8.2 Hz, 1H), 7.65 (d, *J* = 8.2 Hz, 1H). **<sup>13</sup>C NMR** (125 MHz, CDCl<sub>3</sub>, CDCl<sub>3</sub> as the internal standard): δ 150.0, 145.9, 134.7, 133.5, 131.4, 130.9, 130.3, 130.1, 128.5, 127.6, 126.6, 125.3, 122.8. **HRMS** (APCI) calcd for C<sub>13</sub>H<sub>8</sub>Cl<sub>2</sub>N (M+H<sup>+</sup>): 248.0028, found: 248.0025.

### 7,9-dichlorophenanthridine (3pa)

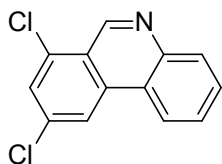

White solid. Isolated yield: 57%. Melting point: 157-158 °C.

**<sup>1</sup>H NMR** (500 MHz, CDCl<sub>3</sub>, TMS as the internal standard): δ 9.62 (s, 1H), 8.41-8.39 (m, 2H), 8.19 (d, *J* = 8.1 Hz, 1H), 7.79 (t, *J* = 7.4 Hz, 1H), 7.70-7.66 (m, 2H). **<sup>13</sup>C NMR** (125 MHz, CDCl<sub>3</sub>, CDCl<sub>3</sub> as the internal standard): δ 149.4, 145.1, 137.2, 135.4, 135.2, 130.8, 130.4, 128.7, 128.3, 122.8, 122.4, 121.9, 121.1. **HRMS** (APCI) calcd for C<sub>13</sub>H<sub>8</sub>Cl<sub>2</sub>N

(M+H<sup>+</sup>): 248.0028, found: 248.0024.

### 7,8-dichlorophenanthridine (3qa)

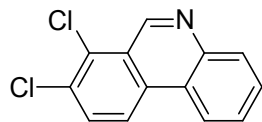

Yeiiow solid. Isolated yield: 60%. Melting point: 135-136 °C.

**<sup>1</sup>H NMR** (500 MHz, CDCl<sub>3</sub>, TMS as the internal standard): δ 9.77 (s, 1H), 8.55-8.53 (m, 1H), 8.49 (d, *J* = 8.8 Hz, 1H), 8.25-8.23 (m, 1H), 7.89 (d, *J* = 8.9 Hz, 1H), 7.83-7.80 (m, 1H), 7.76-7.72 (m, 1H). **<sup>13</sup>C NMR** (125 MHz, CDCl<sub>3</sub>, CDCl<sub>3</sub> as the internal standard): δ 149.7, 144.6, 133.0, 132.5, 132.0, 130.8, 130.0, 128.4, 124.7, 123.0, 122.6, 121.1. **HRMS** (APCI) calcd for C<sub>13</sub>H<sub>8</sub>Cl<sub>2</sub>N (M+H<sup>+</sup>): 248.0028, found: 248.0025.

### 8,9-dimethoxyphenanthridine (3ra)

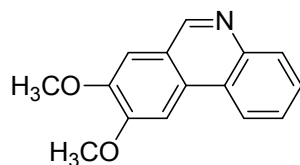

White solid. Isolated yield: 18%. Melting point: 172-173 °C.

**<sup>1</sup>H NMR** (500 MHz, CDCl<sub>3</sub>, TMS as the internal standard): δ 9.15 (s, 1H), 8.44 (d, *J* = 10.3 Hz, 1H), 8.17-8.15 (m, 1H), 7.88 (s, 1H), 7.72-7.62 (m, 2H), 7.35 (s, 1H), 4.14 (s, 3H), 4.07 (s, 3H). **<sup>13</sup>C NMR** (125 MHz, CDCl<sub>3</sub>, CDCl<sub>3</sub> as the internal standard): δ 153.3, 152.2, 150.4, 144.4, 130.5, 128.6, 128.2, 127.0, 124.2, 122.2, 122.1, 108.2, 102.2, 56.6, 56.5. **HRMS** (APCI) calcd for C<sub>15</sub>H<sub>14</sub>NO<sub>2</sub> (M+H<sup>+</sup>): 240.1019, found: 240.0115.

### [1,3]dioxolo[4,5-*j*]phenanthridine (3sa)

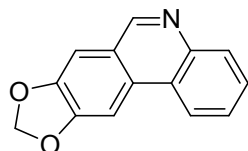

White solid. Isolated yield: 22%. Melting point: 144-145 °C.

**<sup>1</sup>H NMR** (500 MHz, CDCl<sub>3</sub>, TMS as the internal standard): δ 8.98 (s, 1H), 8.30 (d, *J* = 7.9 Hz, 1H), 8.15 (d, *J* = 7.9 Hz, 1H), 7.83 (s, 1H), 7.66-7.58 (m, 2H), 7.21 (s, 1H), 6.18 (s,

2H).  $^{13}\text{C}$  NMR (125 MHz,  $\text{CDCl}_3$ ,  $\text{CDCl}_3$  as the internal standard):  $\delta$  152.1, 151.6, 148.6, 143.5, 130.8, 129.6, 128.5, 127.2, 124.6, 123.2, 122.3, 105.9, 102.4, 100.2. HRMS (APCI) calcd for  $\text{C}_{14}\text{H}_{10}\text{NO}_2$  ( $\text{M}+\text{H}^+$ ): 224.0706, found: 224.0703.

### 10-bromo-[1,3]dioxolo[4,5-*i*]phenanthridine (3ta)

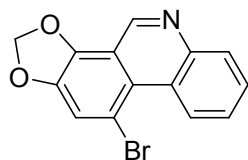

Yellow solid. Isolated yield: 40%. Melting point: 225-226 °C.

$^1\text{H}$  NMR (500 MHz,  $\text{CDCl}_3$ , TMS as the internal standard):  $\delta$  9.51 (s, 1H), 8.83 (d,  $J = 8.0$  Hz, 1H), 8.16 (d,  $J = 8.2$  Hz, 1H), 7.76 (t,  $J = 7.2$  Hz, 1H), 7.66 (t,  $J = 7.2$  Hz, 1H), 7.55 (s, 1H), 6.36 (s, 2H).  $^{13}\text{C}$  NMR (125 MHz,  $\text{CDCl}_3$ ,  $\text{CDCl}_3$  as the internal standard):  $\delta$  152.6, 149.3, 144.6, 143.0, 130.0, 129.8, 127.6, 127.0, 121.3, 120.5, 119.8, 116.7, 114.9, 103.1. HRMS (APCI) calcd for  $\text{C}_{14}\text{H}_9\text{BrNO}_2$  ( $\text{M}+\text{H}^+$ ): 301.9811, found: 301.9810.

### benzo[*k*]phenanthridine (3ua)

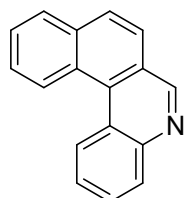

White solid. Isolated yield: 25%. Melting point: 75-76 °C.

$^1\text{H}$  NMR (500 MHz,  $\text{CDCl}_3$ , TMS as the internal standard):  $\delta$  9.35 (s, 1H), 9.19 (d,  $J = 8.1$  Hz, 1H), 9.10 (d,  $J = 8.3$  Hz, 1H), 8.34-8.32 (m, 1H), 7.08-7.7.93 (m, 3H), 7.82-7.73 (m, 4H).  $^{13}\text{C}$  NMR (125 MHz,  $\text{CDCl}_3$ ,  $\text{CDCl}_3$  as the internal standard):  $\delta$  153.0, 147.0, 135.6, 131.6, 130.7, 129.41, 129.4, 129.2, 128.6, 128.5, 128.2, 127.4, 127.3, 127.2, 125.6, 125.5, 125.0. HRMS (APCI) calcd for  $\text{C}_{17}\text{H}_{12}\text{N}$  ( $\text{M}+\text{H}^+$ ): 230.0964, found: 230.0961.

### 7-chloro-1-fluorophenanthridine (3ab)

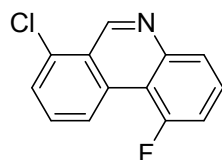

White solid. Isolated yield: 45%. Melting point: 122-123 °C.

**<sup>1</sup>H NMR** (500 MHz, CDCl<sub>3</sub>, TMS as the internal standard): δ 9.79 (s, 1H), 8.97-8.95 (m, 1H), 8.06 (d, *J* = 8.2 Hz, 1H), 7.81-7.71 (m, 3H), 7.46-7.42 (m, 1H). **<sup>13</sup>C NMR** (125 MHz, CDCl<sub>3</sub>, CDCl<sub>3</sub> as the internal standard): δ 160.8 (*J*<sub>F-C</sub> = 253.7 Hz), 151.1, 146.7 (*J*<sub>F-C</sub> = 2.0 Hz), 134.1, 132.7 (*J*<sub>F-C</sub> = 4.8 Hz), 132.0 (*J*<sub>F-C</sub> = 1.7 Hz), 129.3 (*J*<sub>F-C</sub> = 10.6 Hz), 128.9, 126.8 (*J*<sub>F-C</sub> = 3.5 Hz), 126.2 (*J*<sub>F-C</sub> = 23.3 Hz), 123.9, 114.5 (*J*<sub>F-C</sub> = 23.9 Hz), 113.5 (*J*<sub>F-C</sub> = 9.1 Hz). **HRMS** (APCI) calcd for C<sub>13</sub>H<sub>8</sub>ClFN (M+H<sup>+</sup>): 232.0323, found: 232.0321.

### 1,7-dichlorophenanthridine (3ac)

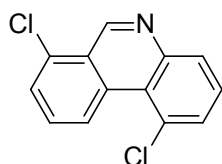

White solid. Isolated yield: 41%. Melting point: 145-146 °C.

**<sup>1</sup>H NMR** (500 MHz, CDCl<sub>3</sub>, TMS as the internal standard): δ 9.82-9.80 (m, 2H), 8.18-8.17 (m, 1H), 7.79-7.75 (m, 3H), 7.66 (t, *J* = 7.7 Hz, 1H). **<sup>13</sup>C NMR** (100 MHz, CDCl<sub>3</sub>, CDCl<sub>3</sub> as the internal standard): δ 150.5, 146.7, 133.7, 133.7, 131.4, 131.0, 130.4, 130.3, 128.7, 128.6, 125.3, 124.1, 121.1. **HRMS** (APCI) calcd for C<sub>13</sub>H<sub>8</sub>Cl<sub>2</sub>N (M+H<sup>+</sup>): 248.0028, found: 248.0024.

### 7-chloro-3-methylphenanthridine (3ad)

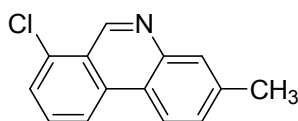

White solid. Isolated yield: 65%. Melting point: 115-116 °C.

**<sup>1</sup>H NMR** (500 MHz, CDCl<sub>3</sub>, TMS as the internal standard) δ 9.74 (s, 1H), 8.51 (d, *J* = 8.4 Hz, 1H), 8.46 (d, *J* = 8.4 Hz, 1H), 8.05 (s, 1H), 7.76 (t, *J* = 7.7 Hz, 1H), 7.71-7.69 (m, 1H), 7.57-7.55 (m, 1H), 2.62 (s, 3H). **<sup>13</sup>C NMR** (125 MHz, CDCl<sub>3</sub>, CDCl<sub>3</sub> as the internal standard) δ 149.2, 143.3, 140.7, 135.2, 134.6, 132.2, 130.3, 129.1, 128.2, 123.0, 122.6, 121.4, 121.2, 22.0. **HRMS** (APCI) calcd for C<sub>14</sub>H<sub>11</sub>ClN (M+H<sup>+</sup>): 228.0574, found: 228.0571.

### 7-chloro-3-methoxyphenanthridine (3ae)

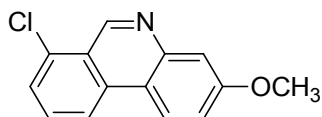

White solid. Isolated yield: 53%. Melting point: 149-150 °C.

**<sup>1</sup>H NMR** (500 MHz, CDCl<sub>3</sub>, TMS as the internal standard) δ 9.71 (s, 1H), 8.43 (t, *J* = 8.8 Hz, 2H), 7.71 (t, *J* = 8.0 Hz, 1H), 7.65-7.61 (m, 2H), 7.35-7.33 (m, 1H), 4.00 (s, 3H). **<sup>13</sup>C NMR** (125 MHz, CDCl<sub>3</sub>, CDCl<sub>3</sub> as the internal standard) δ 160.9, 150.5, 146.6, 135.0, 134.3, 131.4, 127.3, 124.0, 122.8, 120.8, 119.2, 117.6, 110.3, 56.0. **HRMS** (APCI) calcd for C<sub>14</sub>H<sub>11</sub>ClNO (M+H<sup>+</sup>): 244.0523, found: 244.0522.

### 7-chloro-3-fluorophenanthridine (3af)

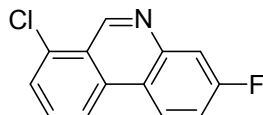

White solid. Isolated yield: 65%. Melting point: 84-85 °C.

**<sup>1</sup>H NMR** (500 MHz, CDCl<sub>3</sub>, TMS as the internal standard): δ 9.77 (s, 1H), 8.57-8.54 (m, 1H), 8.47 (d, *J* = 8.0 Hz, 1H), 7.92-7.89 (m, 1H), 7.79 (t, *J* = 7.9 Hz, 1H), 7.73 (d, *J* = 7.3 Hz, 1H), 7.51-7.47 (m, 1H). **<sup>13</sup>C NMR** (125 MHz, CDCl<sub>3</sub>, CDCl<sub>3</sub> as the internal standard): δ 163.4 (d, *J* = 248.5 Hz), 151.1, 134.7 (*J*<sub>F-C</sub> = 3.2 Hz), 132.1, 128.4 (2C), 124.9 (*J*<sub>F-C</sub> = 9.5 Hz), 123.2, 121.1 (2C), 120.3 (*J*<sub>F-C</sub> = 1.8 Hz), 117.4 (*J*<sub>F-C</sub> = 23.8 Hz), 114.9 (*J*<sub>F-C</sub> = 20.6 Hz). **HRMS** (APCI) calcd for C<sub>13</sub>H<sub>8</sub>ClFN (M+H<sup>+</sup>): 232.0323, found: 232.0320.

### 7-chloro-3-(trifluoromethyl)phenanthridine (3ag)

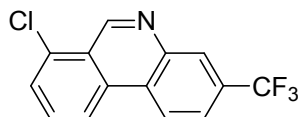

White solid. Isolated yield: 64%. Melting point: 224-225 °C.

**<sup>1</sup>H NMR** (500 MHz, CDCl<sub>3</sub>, TMS as the internal standard): δ 9.83 (s, 1H), 8.67 (d, *J* = 8.7 Hz, 1H), 8.56 (d, *J* = 7.8 Hz, 1H), 8.54 (s, 1H), 7.93-7.91 (m, 1H), 7.87-7.81 (m, 2H). **<sup>13</sup>C NMR** (125 MHz, CDCl<sub>3</sub>, CDCl<sub>3</sub> as the internal standard): δ 151.4, 144.1, 134.6, 133.9, 132.0, 131.5 (*J*<sub>F-C</sub> = 33.0 Hz), 129.6, 128.3 (*J*<sub>F-C</sub> = 4.1 Hz), 125.8, 125.4, 124.1, 123.9 (*J*<sub>F-C</sub> = 4.6 Hz), 123.2, 121.6. **HRMS** (APCI) calcd for C<sub>14</sub>H<sub>8</sub>ClF<sub>3</sub>N (M+H<sup>+</sup>): 282.0291, found:



292.0288.

**methyl 7-chlorophenanthridine-3-carboxylate (3ah)**

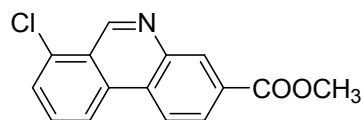

White solid. Isolated yield: 57%. Melting point: 198-199 °C.

**<sup>1</sup>H NMR** (500 MHz, CDCl<sub>3</sub>, TMS as the internal standard):  $\delta$  9.81 (s, 1H), 8.89 (s, 1H), 8.61-8.55 (m, 2H), 8.31 (d,  $J = 8.5$  Hz, 1H), 7.82-7.78 (m, 2H), 4.03 (s, 3H). **<sup>13</sup>C NMR** (125 MHz, CDCl<sub>3</sub>, CDCl<sub>3</sub> as the internal standard):  $\delta$  167.0, 151.0, 144.4, 134.5, 134.1, 132.8, 131.7, 131.2, 129.5, 127.9, 126.7, 124.2, 123.1, 121.8, 52.9. **HRMS** (APCI) calcd for C<sub>15</sub>H<sub>11</sub>ClO<sub>2</sub>N (M+H<sup>+</sup>): 272.0472, found: 272.0468.

**7-chloro-2-fluorophenanthridine (3ai)**

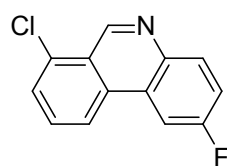

White solid. Isolated yield: 36%. Melting point: 167-168 °C.

**<sup>1</sup>H NMR** (500 MHz, CDCl<sub>3</sub>, TMS as the internal standard):  $\delta$  9.78 (s, 1H), 8.51 (d,  $J = 7.8$  Hz, 1H), 8.32 (d,  $J = 8.4$  Hz, 1H), 7.81-7.75 (m, 2H), 7.68-7.63 (m, 1H), 7.51-7.48 (m, 1H). **<sup>13</sup>C NMR** (125 MHz, CDCl<sub>3</sub>, CDCl<sub>3</sub> as the internal standard):  $\delta$  159.2 (d,  $J_{F-C} = 254.0$  Hz), 150.3, 134.6, 134.5, 134.1 ( $J_{F-C} = 2.8$  Hz), 131.9, 129.1, 128.0 ( $J_{F-C} = 8.5$  Hz), 125.5, 123.8, 121.6, 118.4 (d,  $J_{F-C} = 4.5$  Hz), 114.7 (d,  $J_{F-C} = 19.1$  Hz). **HRMS** (APCI) calcd for C<sub>13</sub>H<sub>8</sub>ClFN (M+H<sup>+</sup>): 232.0323, found: 232.0325.

**2,7-dichlorophenanthridine (3aj)**

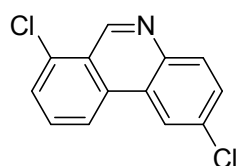

White solid. Isolated yield: 47%. Melting point: 161-162 °C.

**<sup>1</sup>H NMR** (500 MHz, CDCl<sub>3</sub>, TMS as the internal standard)  $\delta$  9.74 (s, 1H), 8.52 (d,  $J = 2.8$

Hz, 1H), 8.48-8.45 (m, 1H), 8.16 (d,  $J = 10.9$  Hz, 1H), 7.82-7.72 (m, 3H).  $^{13}\text{C}$  NMR (125 MHz,  $\text{CDCl}_3$ ,  $\text{CDCl}_3$  as the internal standard)  $\delta$  150.3, 143.2, 134.5, 134.0, 133.8, 132.2, 131.7, 130.3, 129.1, 124.6, 123.8, 122.5, 121.3. HRMS (APCI) calcd for  $\text{C}_{13}\text{H}_8\text{Cl}_2\text{N}$  ( $\text{M}+\text{H}^+$ ): 248.0028, found: 248.0025.

### 7-chloro-2-(trifluoromethyl)phenanthridine (3ak)

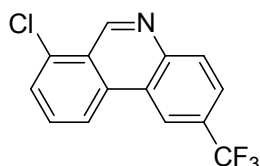

White solid. Isolated yield: 63%. Melting point: 136-137 °C.

$^1\text{H}$  NMR (500 MHz,  $\text{CDCl}_3$ , TMS as the internal standard):  $\delta$  9.77 (s, 1H), 8.76 (s, 1H), 8.49 (d,  $J = 8.0$  Hz, 1H), 8.29 (d,  $J = 8.5$  Hz, 1H), 7.96 (d,  $J = 8.4$  Hz, 1H), 7.81-7.75 (m, 2H).  $^{13}\text{C}$  NMR (125 MHz,  $\text{CDCl}_3$ ,  $\text{CDCl}_3$  as the internal standard):  $\delta$  152.1, 146.1, 134.6, 134.3, 132.1, 131.7, 129.6 ( $J_{\text{F-C}} = 32.3$  Hz), 129.3, 125.7 ( $J_{\text{F-C}} = 3.4$  Hz), 125.6, 123.8, 123.4, 123.1, 121.2, 120.6 ( $J_{\text{F-C}} = 4.6$  Hz). HRMS (APCI) calcd for  $\text{C}_{14}\text{H}_8\text{ClF}_3\text{N}$  ( $\text{M}+\text{H}^+$ ): 282.0291, found: 282.0289.

### 7-chloro-2-methylphenanthridine (3al)

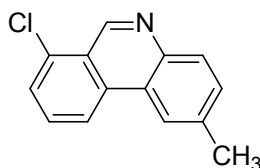

White solid. Isolated yield: 58%. Melting point: 147-148 °C

$^1\text{H}$  NMR (500 MHz,  $\text{CDCl}_3$ , TMS as the internal standard)  $\delta$  9.69 (s, 1H), 8.51 (d,  $J = 7.9$  Hz, 1H), 8.33 (s, 1H), 8.11 (d,  $J = 8.3$  Hz, 1H), 7.75-7.69 (m, 2H), 7.62-7.60 (m, 1H), 2.64 (s, 3H).  $^{13}\text{C}$  NMR (125 MHz,  $\text{CDCl}_3$ ,  $\text{CDCl}_3$  as the internal standard)  $\delta$  149.1, 143.1, 138.0, 134.5, 134.2, 131.5, 131.1, 130.4, 128.3, 123.7, 123.3, 122.4, 121.3, 22.4. HRMS (APCI) calcd for  $\text{C}_{14}\text{H}_{11}\text{ClN}$  ( $\text{M}+\text{H}^+$ ): 228.0574, found: 228.0572.

### 7-chloro-4-fluorophenanthridine (3ai')

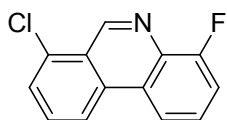

White solid. Isolated yield: 37%. Melting point: 159-160 °C.

**<sup>1</sup>H NMR** (500 MHz, CDCl<sub>3</sub>, TMS as the internal standard):  $\delta$  9.72 (s, 1H), 8.43 (d,  $J = 7.9$  Hz, 1H), 8.32-8.29 (m, 1H), 8.19-8.16 (m, 1H), 7.84-7.78 (m, 2H), 7.58-7.54 (m, 1H). **<sup>13</sup>C NMR** (125 MHz, CDCl<sub>3</sub>, CDCl<sub>3</sub> as the internal standard):  $\delta$  162.0 ( $J_{F-C} = 247.3$  Hz), 149.0, 141.1, 134.5, 134.2 ( $J_{F-C} = 4.0$  Hz), 132.7 ( $J_{F-C} = 9.1$  Hz), 131.7, 129.2, 125.0 ( $J_{F-C} = 7.7$  Hz), 123.6, 121.4, 118.9 ( $J_{F-C} = 24.1$  Hz), 107.8 ( $J_{F-C} = 23.5$  Hz). HRMS (APCI) calcd for C<sub>13</sub>H<sub>8</sub>ClFN (M+H<sup>+</sup>): 232.0323, found: 232.0322.

#### 4,7-dichlorophenanthridine (3aj')

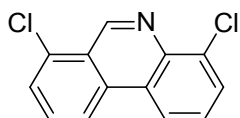

White solid. Isolated yield: 31%. Melting point: 167-168 °C.

**<sup>1</sup>H NMR** (500 MHz, CDCl<sub>3</sub>, TMS as the internal standard):  $\delta$  9.88 (s, 1H), 8.54-8.49 (m, 2H), 7.90 (d,  $J = 7.6$  Hz, 1H), 7.82-7.76 (m, 2H), 7.63 (d,  $J = 7.8$  Hz, 1H). **<sup>13</sup>C NMR** (125 MHz, CDCl<sub>3</sub>, CDCl<sub>3</sub> as the internal standard):  $\delta$  150.7, 141.1, 135.1, 134.6, 134.6, 131.9, 130.2, 129.1, 127.9, 125.3, 123.7, 121.8, 121.5; **HRMS** (APCI) calcd for C<sub>13</sub>H<sub>8</sub>Cl<sub>2</sub>N (M+H<sup>+</sup>): 248.0028, found: 248.0026.

#### 2,4,7-trichlorophenanthridine (3am)

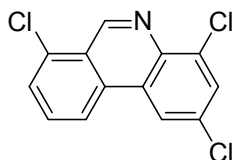

White solid. Isolated yield: 76%. Melting point: 199-200 °C.

**<sup>1</sup>H NMR** (500 MHz, CDCl<sub>3</sub>, TMS as the internal standard):  $\delta$  9.86 (s, 1H), 8.46-8.45 (m, 2H), 7.89 (d,  $J = 2.2$  Hz, 1H), 7.85-7.81 (m, 2H). **<sup>13</sup>C NMR** (125 MHz, CDCl<sub>3</sub>, CDCl<sub>3</sub> as the internal standard):  $\delta$  150.8, 139.6, 136.0, 134.8, 133.6, 132.3, 130.4, 129.8, 125.9, 123.9, 121.6, 121.5. HRMS (APCI) calcd for C<sub>13</sub>H<sub>7</sub>Cl<sub>3</sub>N (M+H<sup>+</sup>): 281.9638, found: 281.9635.

### 7-chloro-2,4-dimethylphenanthridine (3an)

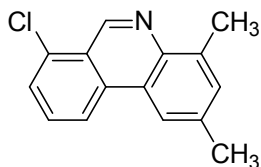

White solid. Isolated yield: 46%. Melting point: 129-130 °C.

**<sup>1</sup>H NMR** (500 MHz, CDCl<sub>3</sub>, TMS as the internal standard):  $\delta$  9.73 (s, 1H), 8.51 (d,  $J$  = 7.6 Hz, 1H), 8.20 (s, 1H), 7.73-7.68 (m, 2H), 7.48 (s, 1H), 2.85 (s, 3H), 2.59 (s, 3H). **<sup>13</sup>C NMR** (125 MHz, CDCl<sub>3</sub>, CDCl<sub>3</sub> as the internal standard):  $\delta$  147.3, 141.6, 137.7, 137.0, 134.4, 133.8, 131.9, 130.4, 127.6, 123.0, 122.9, 121.1, 119.8, 22.0, 18.4. **HRMS** (APCI) calcd for C<sub>15</sub>H<sub>13</sub>ClN (M+H<sup>+</sup>): 242.0731, found: 242.0728.

### 2,3,7-trichlorophenanthridine (3ao)

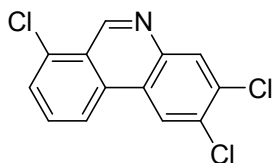

White solid. Isolated yield: 65%. Melting point: 184-185 °C.

**<sup>1</sup>H NMR** (500 MHz, CDCl<sub>3</sub>, TMS as the internal standard):  $\delta$  9.75 (s, 1H), 8.63 (s, 1H), 8.42 (d,  $J$  = 8.8 Hz, 1H), 8.33 (s, 1H), 7.82-7.77 (m, 2H). **<sup>13</sup>C NMR** (125 MHz, CDCl<sub>3</sub>, CDCl<sub>3</sub> as the internal standard):  $\delta$  151.4, 143.8, 134.7, 134.0, 133.4, 132.5, 132.0, 131.8, 129.3, 124.3, 123.7, 123.1, 121.2. **HRMS** (APCI) calcd for C<sub>13</sub>H<sub>7</sub>Cl<sub>3</sub>N (M+H<sup>+</sup>): 281.9638, found: 281.9636.

### 7-chloro-2,3-dimethylphenanthridine (3ap)

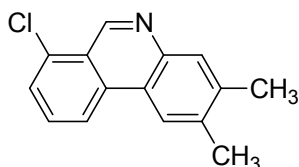

White solid. Isolated yield: 40%. Melting point: 162-163 °C.

**<sup>1</sup>H NMR** (500 MHz, CDCl<sub>3</sub>, TMS as the internal standard):  $\delta$  9.66 (s, 1H), 8.48 (d,  $J$  = 8.1 Hz, 1H), 8.28 (s, 1H), 7.96 (s, 1H), 7.72-7.65 (m, 2H), 2.53 (s, 3H), 2.51 (s, 3H). **<sup>13</sup>C NMR**

(125 MHz, CDCl<sub>3</sub>, CDCl<sub>3</sub> as the internal standard):  $\delta$  149.1, 143.7, 139.5, 137.6, 134.5, 134.2, 131.0, 130.5, 127.8, 123.3, 122.8, 121.5, 121.1, 20.9, 20.6. **HRMS** (APCI) calcd for C<sub>15</sub>H<sub>13</sub>ClN (M+H<sup>+</sup>): 242.0731, found: 242.0728.

#### 4-chlorobenzo[*a*]phenanthridine (3aq)

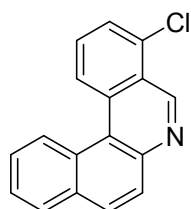

White solid. Isolated yield: 35%. Melting point: 147-148 °C

**<sup>1</sup>H NMR** (500 MHz, CDCl<sub>3</sub>, TMS as the internal standard):  $\delta$  9.86 (s, 1H), 9.00-8.97 (m, 2H), 8.14-8.12 (m, 1H), 8.07-8.05 (m, 2H), 7.79-7.67 (m, 4H). **<sup>13</sup>C NMR** (125 MHz, CDCl<sub>3</sub>, CDCl<sub>3</sub> as the internal standard):  $\delta$  149.4, 144.8, 134.7, 134.0, 133.9, 130.8, 130.7, 129.9, 129.3, 128.6, 128.1, 127.7, 127.2, 127.1, 126.0, 124.9, 120.4. **HRMS** (APCI) calcd for C<sub>17</sub>H<sub>11</sub>ClN (M+H<sup>+</sup>): 264.0574, found: 264.0571.

#### 6-chlorothieno[2,3-*c*]isoquinoline (3ar)

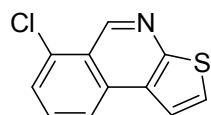

Yellow solid. Isolated yield: 20%. Melting point: 94-95 °C.

**<sup>1</sup>H NMR** (500 MHz, CDCl<sub>3</sub>, TMS as the internal standard):  $\delta$  9.56 (s, 1H), 8.19-8.17 (m, 1H), 7.83 (d, *J* = 5.9 Hz, 1H), 7.70-7.64 (m, 3H). **<sup>13</sup>C NMR** (100 MHz, CDCl<sub>3</sub>, CDCl<sub>3</sub> as the internal standard):  $\delta$  156.9, 146.6, 133.7, 133.3, 130.7, 126.94, 126.9, 122.9, 121.9, 199.7. **HRMS** (APCI) calcd for C<sub>11</sub>H<sub>7</sub>ClNS (M+H<sup>+</sup>): 219.9982, found: 219.9978.

#### 2,4-dichloro-7-methylphenanthridine (3dm)

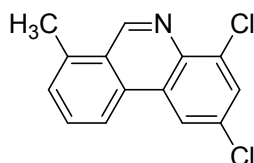

White solid. Isolated yield: 55%. Melting point: 171-172 °C.

**<sup>1</sup>H NMR** (500 MHz, CDCl<sub>3</sub>, TMS as the internal standard):  $\delta$  9.63 (s, 1H), 8.43 (s, 1H), 8.35 (d,  $J$  = 8.3 Hz, 1H), 7.81 (d,  $J$  = 1.7 Hz, 1H), 7.77 (t,  $J$  = 7.6 Hz, 1H), 7.56 (d,  $J$  = 7.2 Hz, 1H), 2.87 (s, 3H). **<sup>13</sup>C NMR** (125 MHz, CDCl<sub>3</sub>, CDCl<sub>3</sub> as the internal standard):  $\delta$  151.4, 139.4, 137.4, 135.7, 132.8, 132.0, 131.9, 130.5, 129.5, 126.9, 125.5, 121.5, 120.6, 19.1. **HRMS** (APCI) calcd for C<sub>14</sub>H<sub>10</sub>Cl<sub>2</sub>N (M+H<sup>+</sup>): 262.0184, found: 262.0182.

**methyl 7,10-dichlorophenanthridine-3-carboxylate (3nh)**

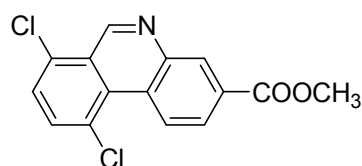

White solid. Isolated yield: 57%. Melting point: 177-178 °C.

**<sup>1</sup>H NMR** (500 MHz, CDCl<sub>3</sub>, TMS as the internal standard):  $\delta$  9.86 (d,  $J$  = 9.0 Hz, 1 H), 9.83 (s, 1H), 8.90 (d,  $J$  = 2 Hz, 1H), 8.32-8.30 (m, 1H), 7.88 (d,  $J$  = 8.3 Hz, 1H), 7.72 (t,  $J$  = 8.3 Hz, 1H), 4.04 (s, 3H). **<sup>13</sup>C NMR** (125 MHz, CDCl<sub>3</sub>, CDCl<sub>3</sub> as the internal standard):  $\delta$  166.8, 150.9, 145.7, 135.0, 133.7, 132.6, 131.3, 131.0, 130.8, 129.5, 127.3, 126.9, 126.0, 125.9, 52.9. **HRMS** (APCI) calcd for C<sub>15</sub>H<sub>10</sub>Cl<sub>2</sub>O<sub>2</sub>N (M+H<sup>+</sup>): 306.0083, found: 306.0081.

**3-chloro-[1,1'-biphenyl]-2-carbaldehyde (A)**

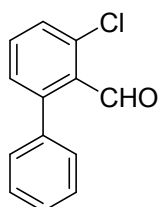

**<sup>1</sup>H NMR** (500 MHz, CDCl<sub>3</sub>, TMS as the internal standard):  $\delta$  10.06 (s, 1H), 7.49-7.48 (m, 2H), 7.44-7.42 (m, 3H), 7.33-7.29 (m, 3H); **<sup>13</sup>C NMR** (125 MHz, CDCl<sub>3</sub>, CDCl<sub>3</sub> as the internal standard):  $\delta$  191.6, 147.0, 138.4, 134.9, 133.1, 132.3, 130.6, 128.9, 128.7.

**1-chloro-9H-fluoren-9-one (B)**

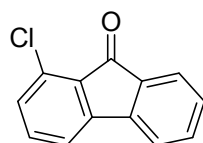

**<sup>1</sup>H NMR** (500 MHz, CDCl<sub>3</sub>, TMS as the internal standard):  $\delta$  7.69 (d,  $J$  = 7.4 Hz, 1H), 7.54-7.49 (m, 2H), 7.45-7.38 (m, 2H), 7.35-7.32 (m, 1H), 7.23-7.21 (m, 1H); **<sup>13</sup>C NMR**

(125 MHz, CDCl<sub>3</sub>, CDCl<sub>3</sub> as the internal standard):  $\delta$  191.2, 146.9, 143.0, 135.6, 135.1, 134.3, 133.2, 131.4, 130.1, 129.9, 124.9, 120.8, 119.1.

# Copies of $^1\text{H}$ , $^{13}\text{C}$ Spectra

## 7-fluorophenanthridine (3ba)

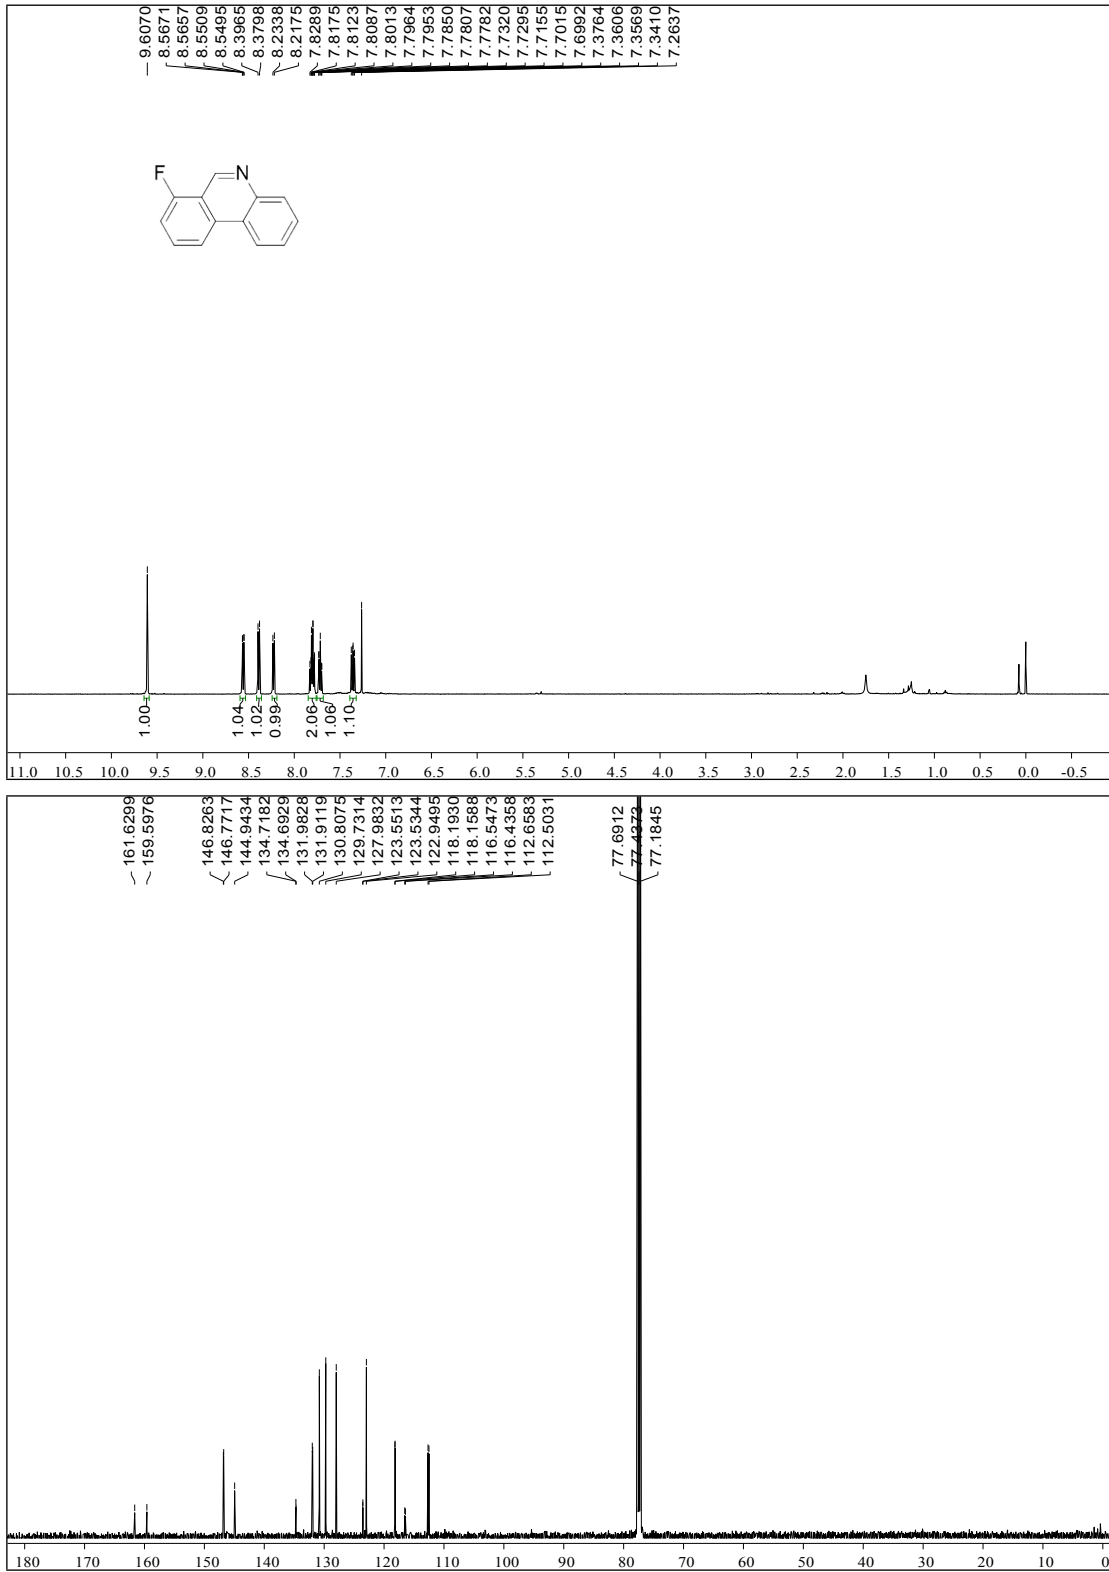



# 7-chlorophenanthridine (3aa)

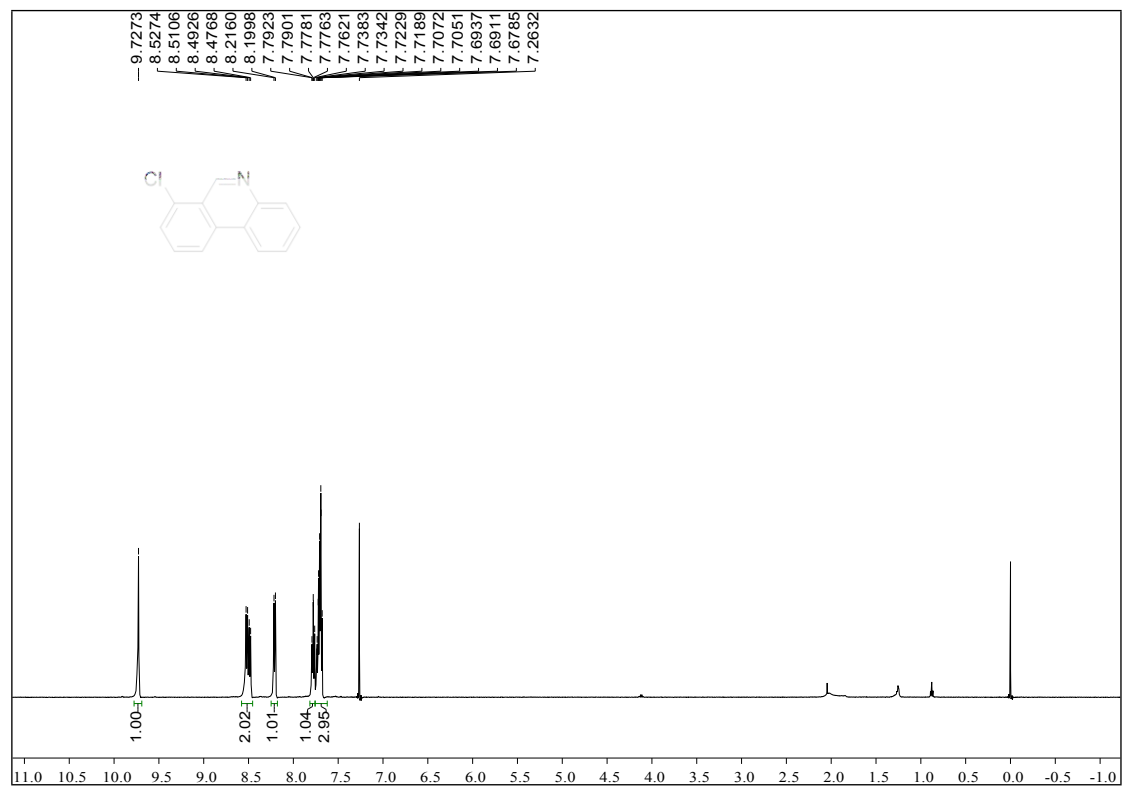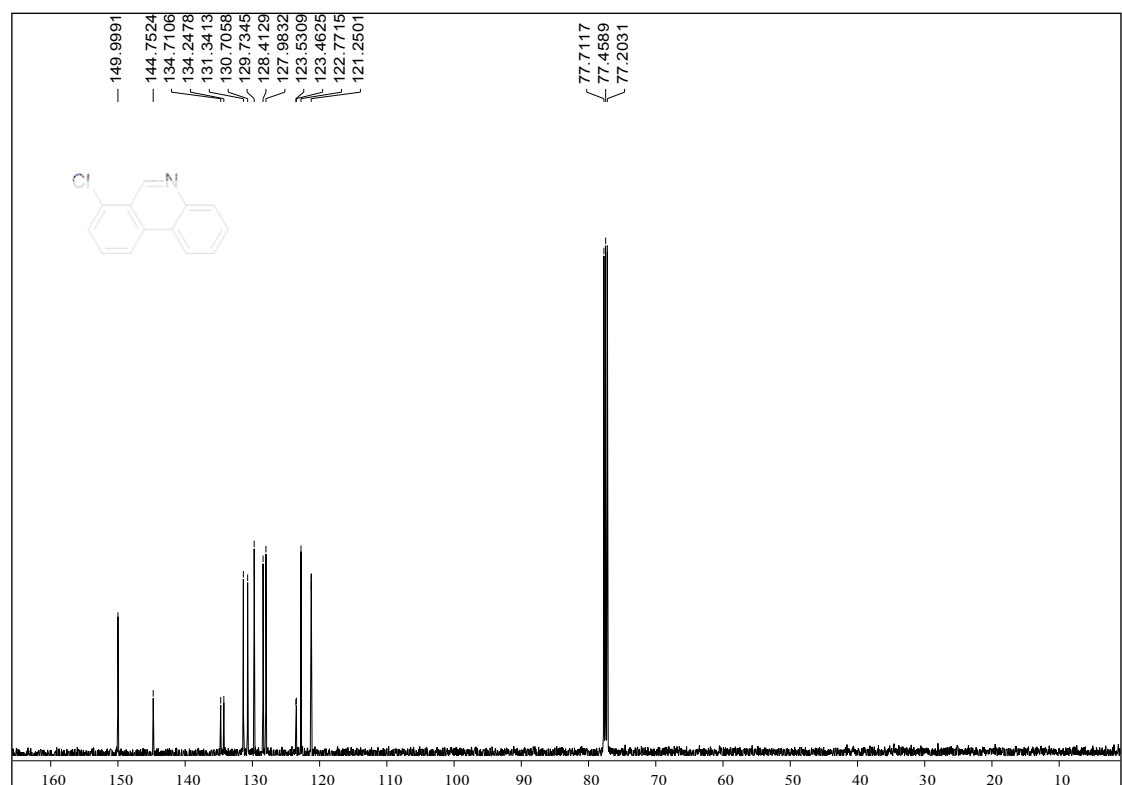

### 7-bromophenanthridine (3ca)

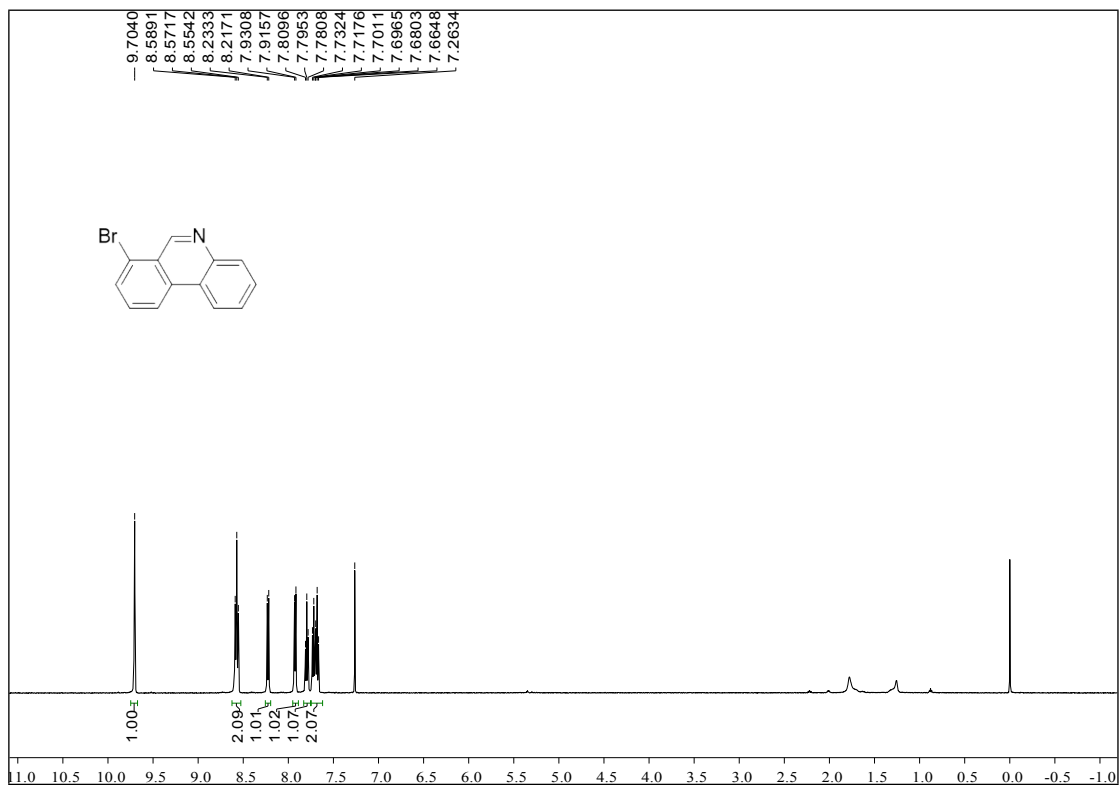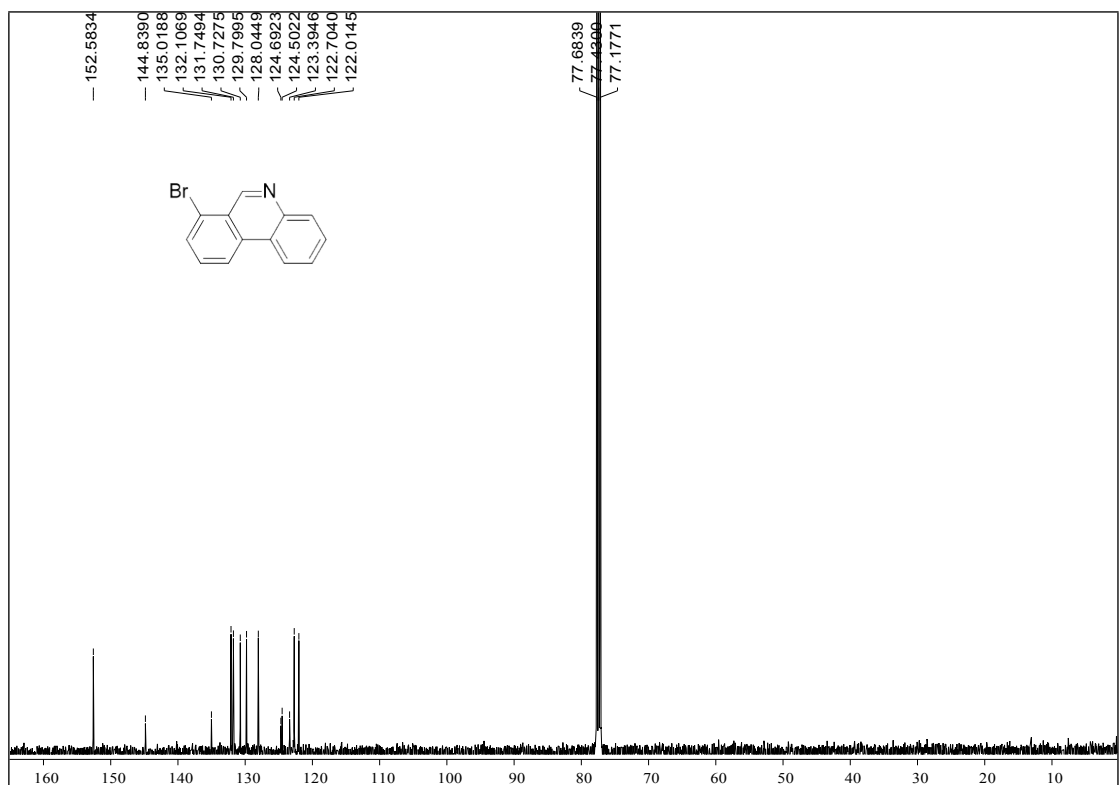

### 7-methylphenanthridine (3da)

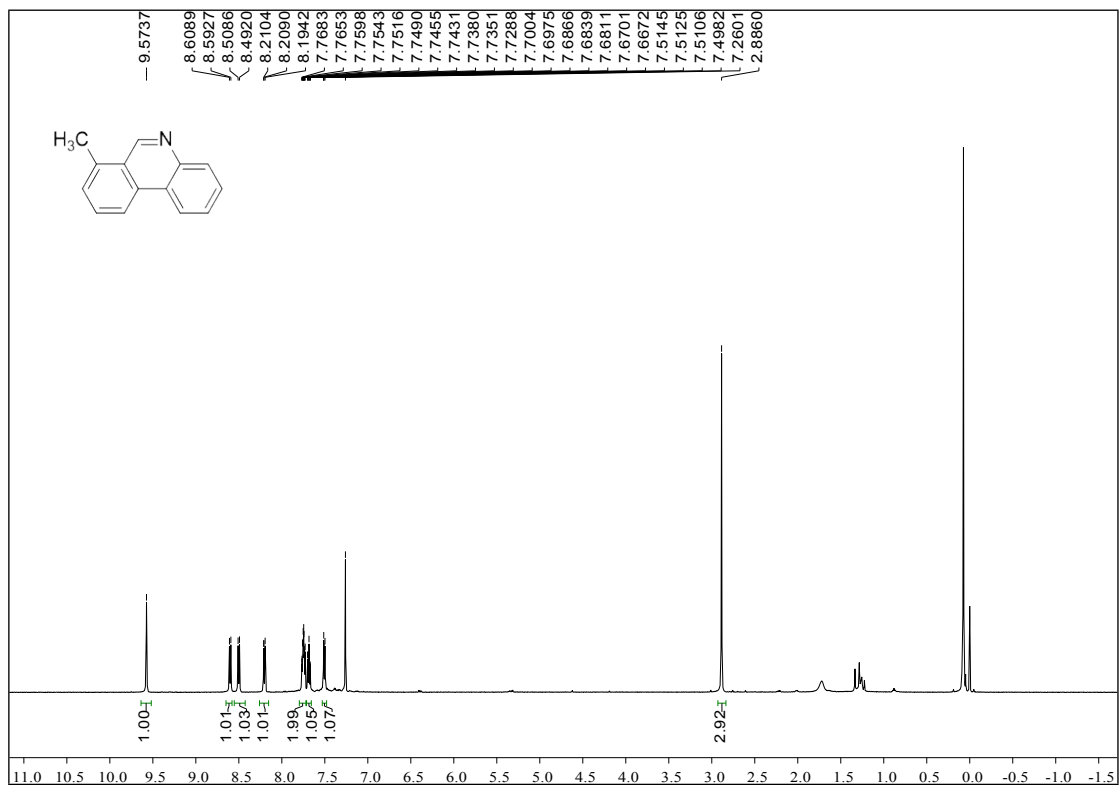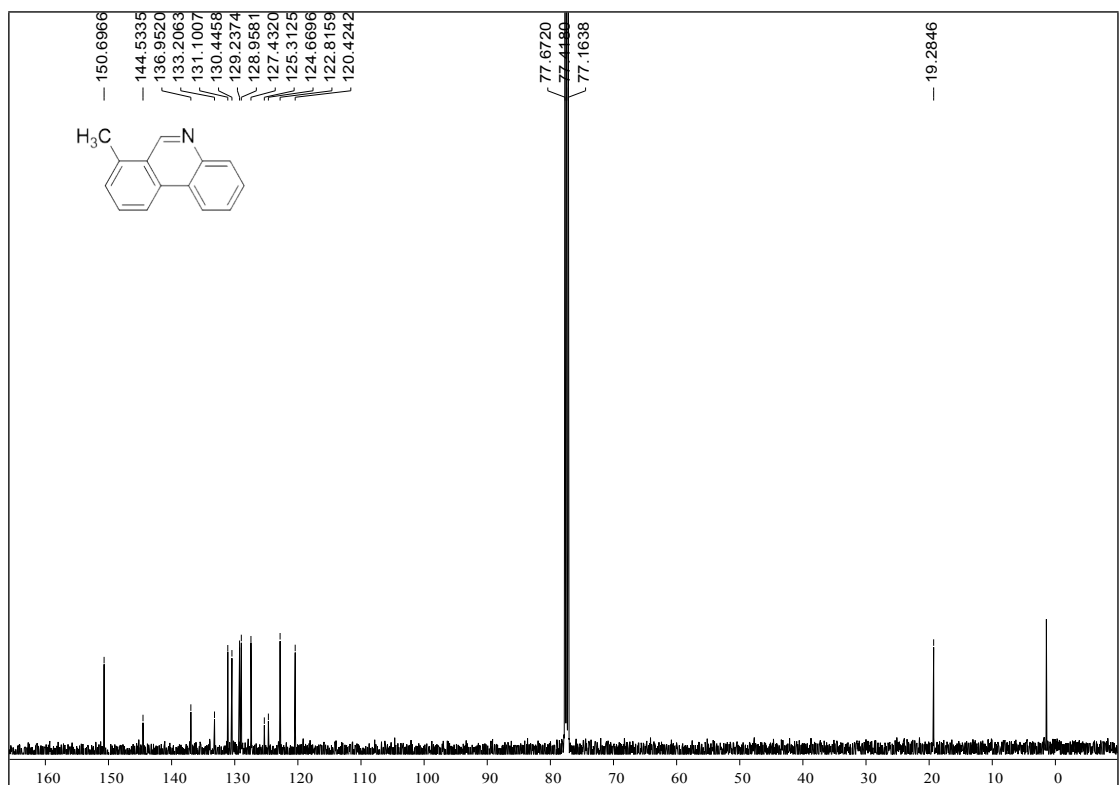

# 8-chlorophenanthridine (3ea)

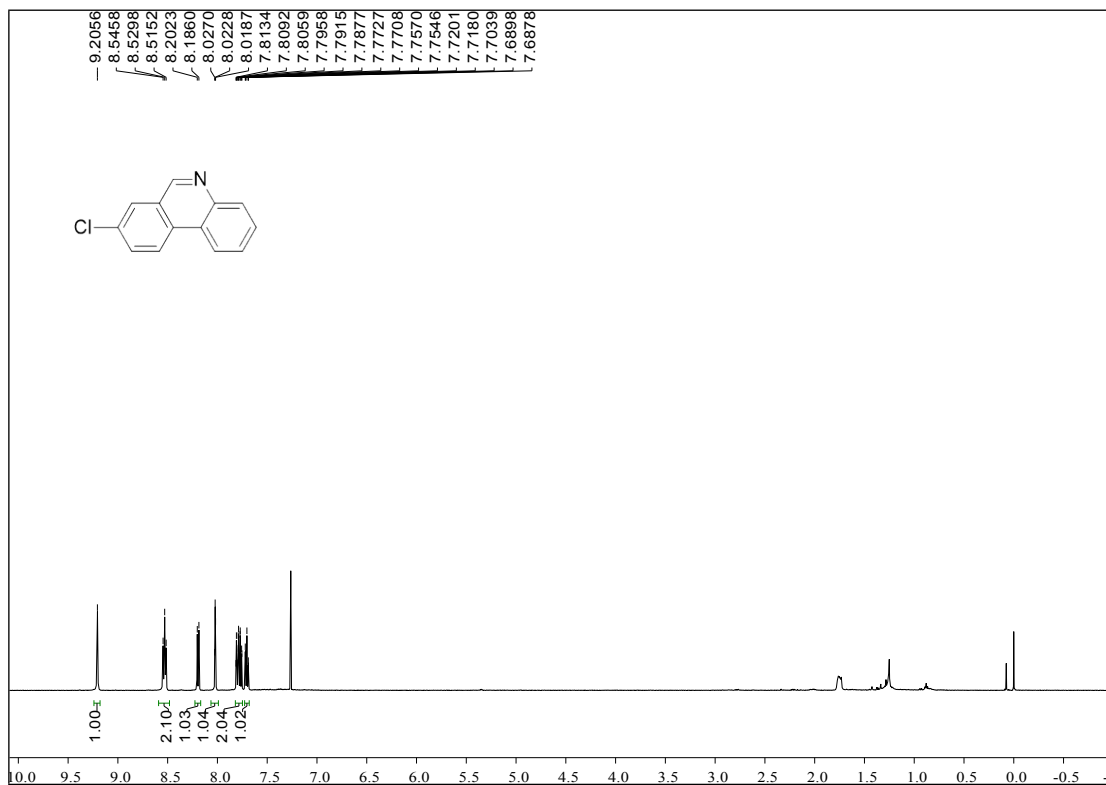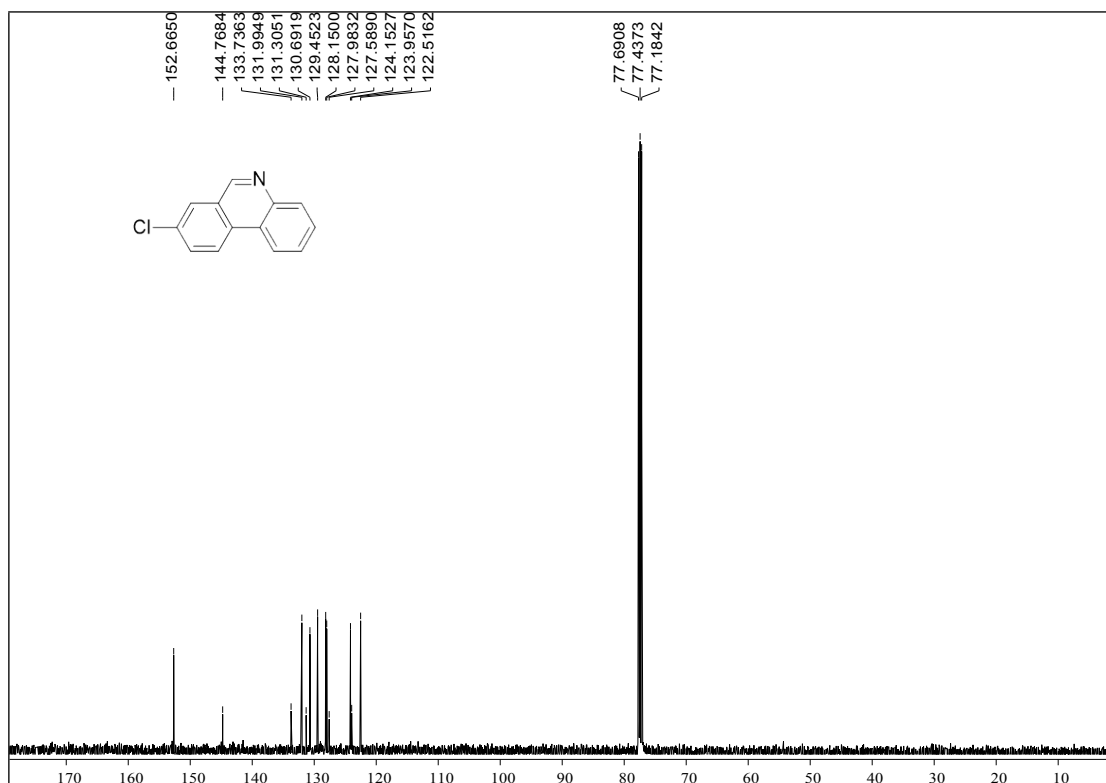

### 8-bromophenanthridine (3fa)

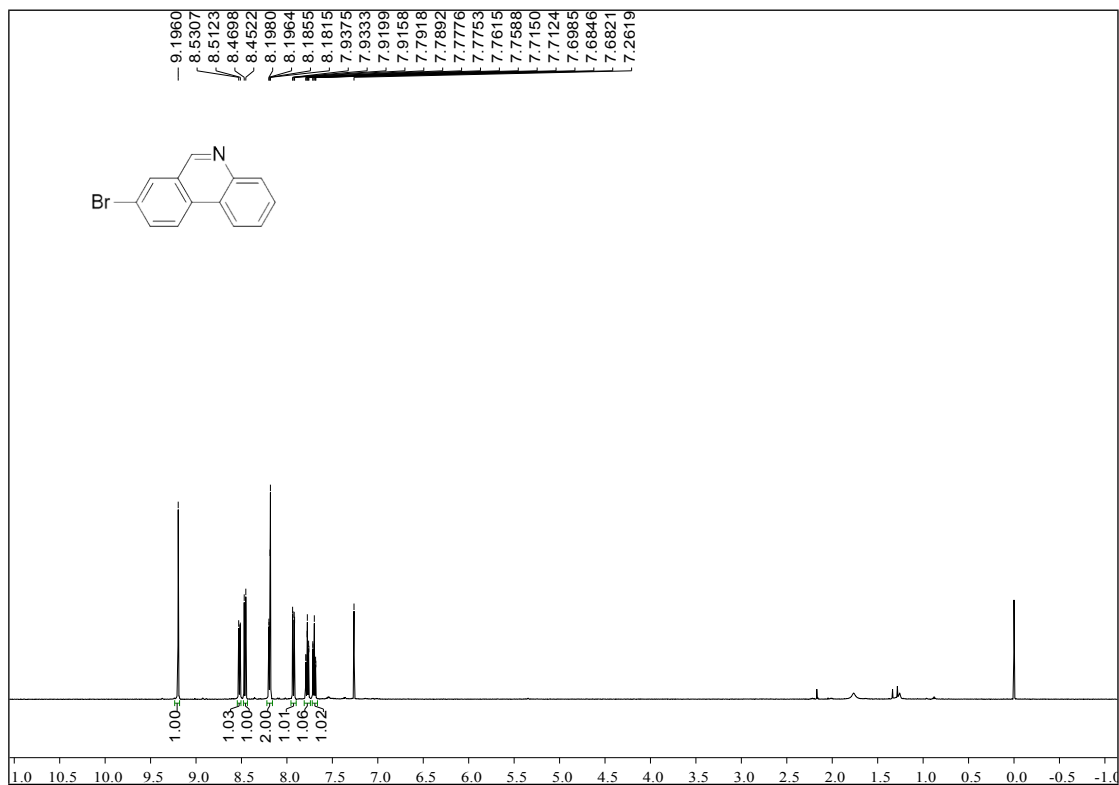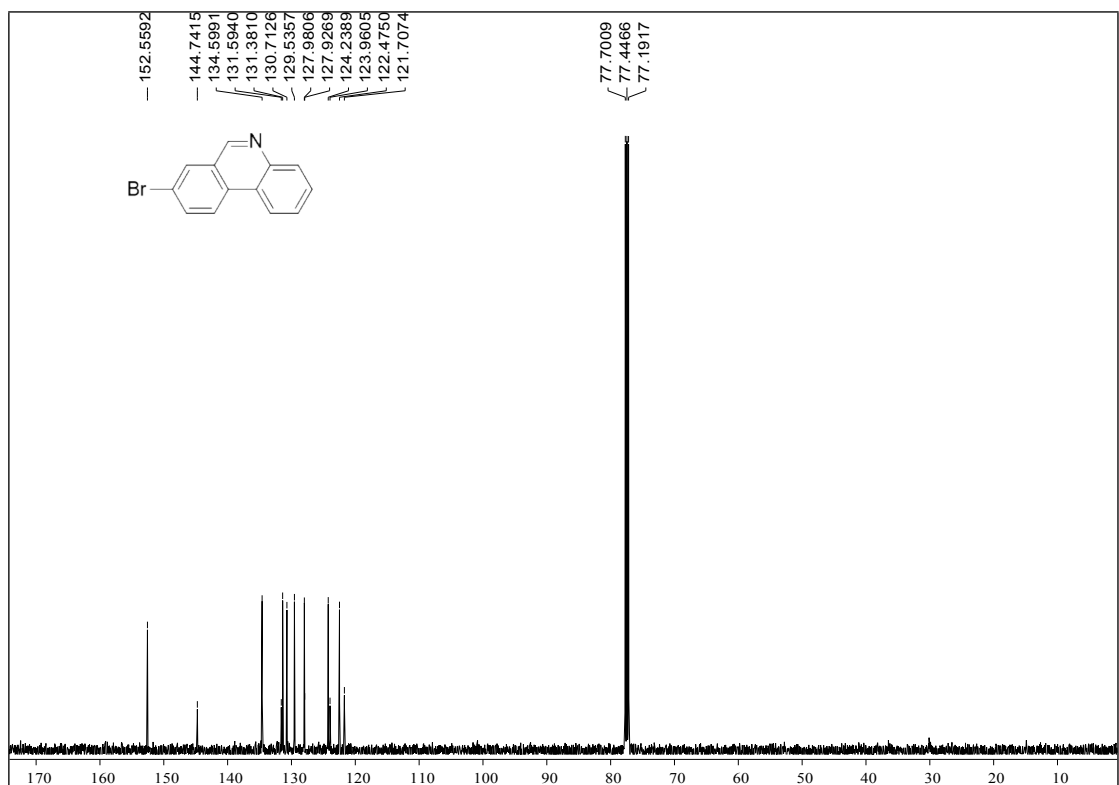

### 8-(trifluoromethyl)phenanthridine (3ga)

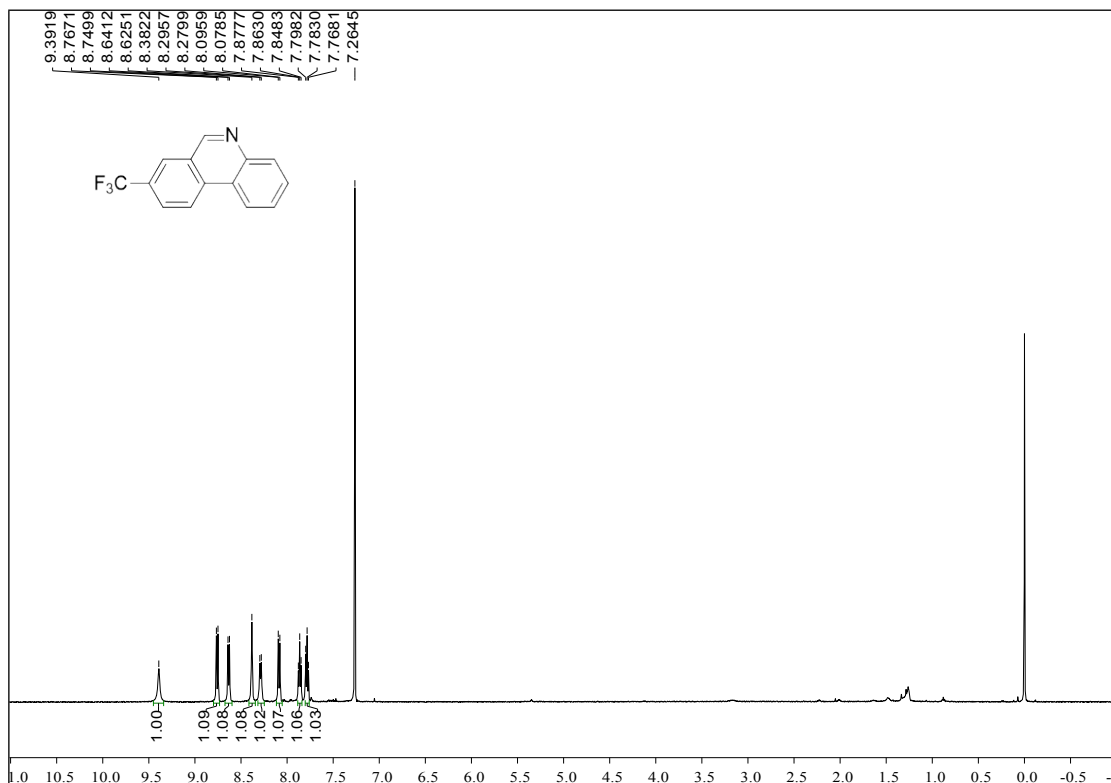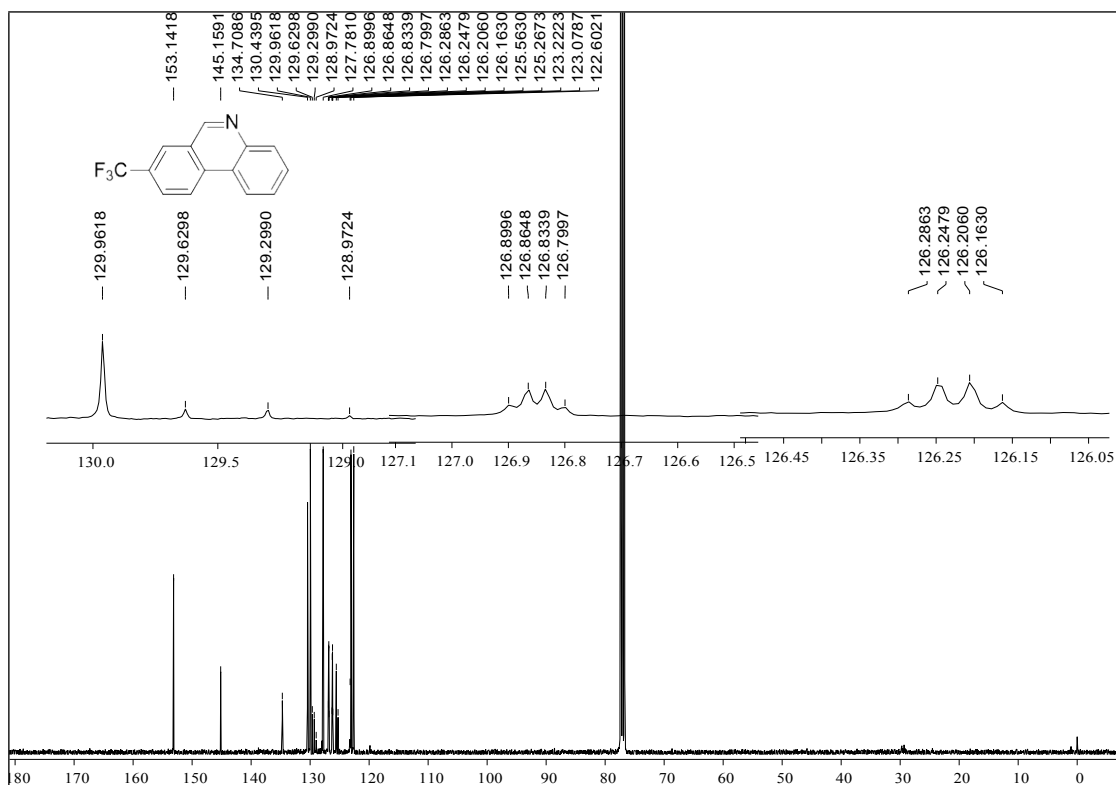

### 8-methylphenanthridine (3ha)

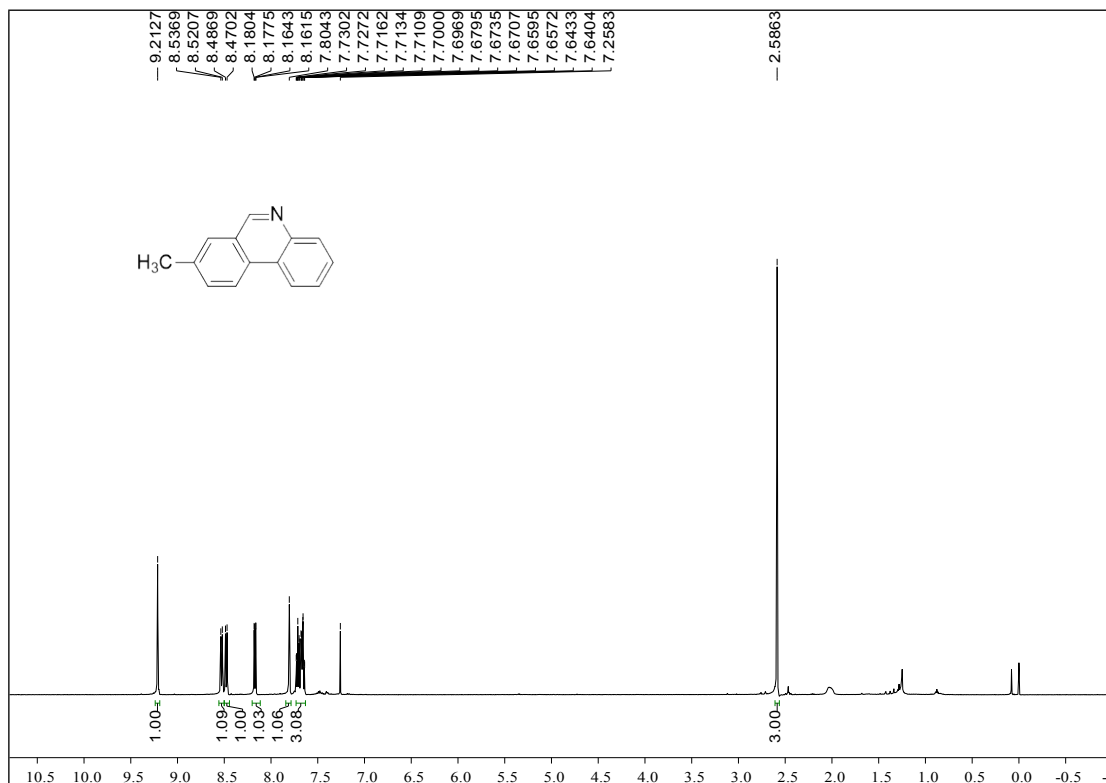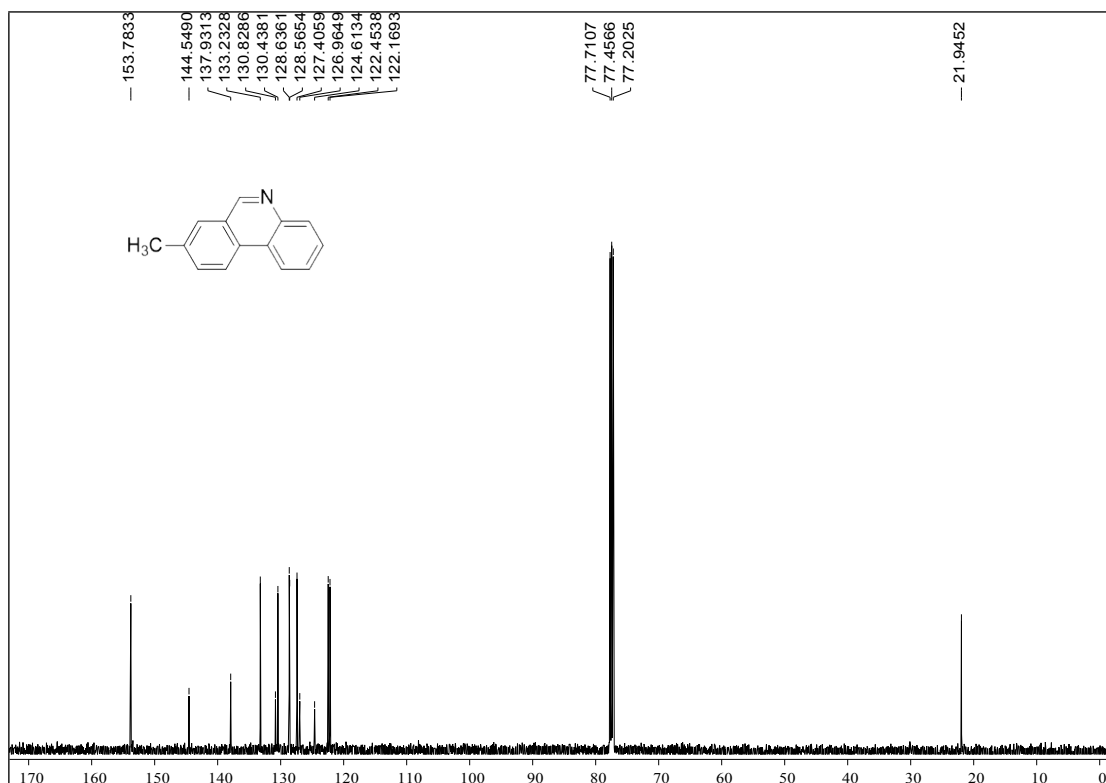

### 8-methoxyphenanthridine (3ia)

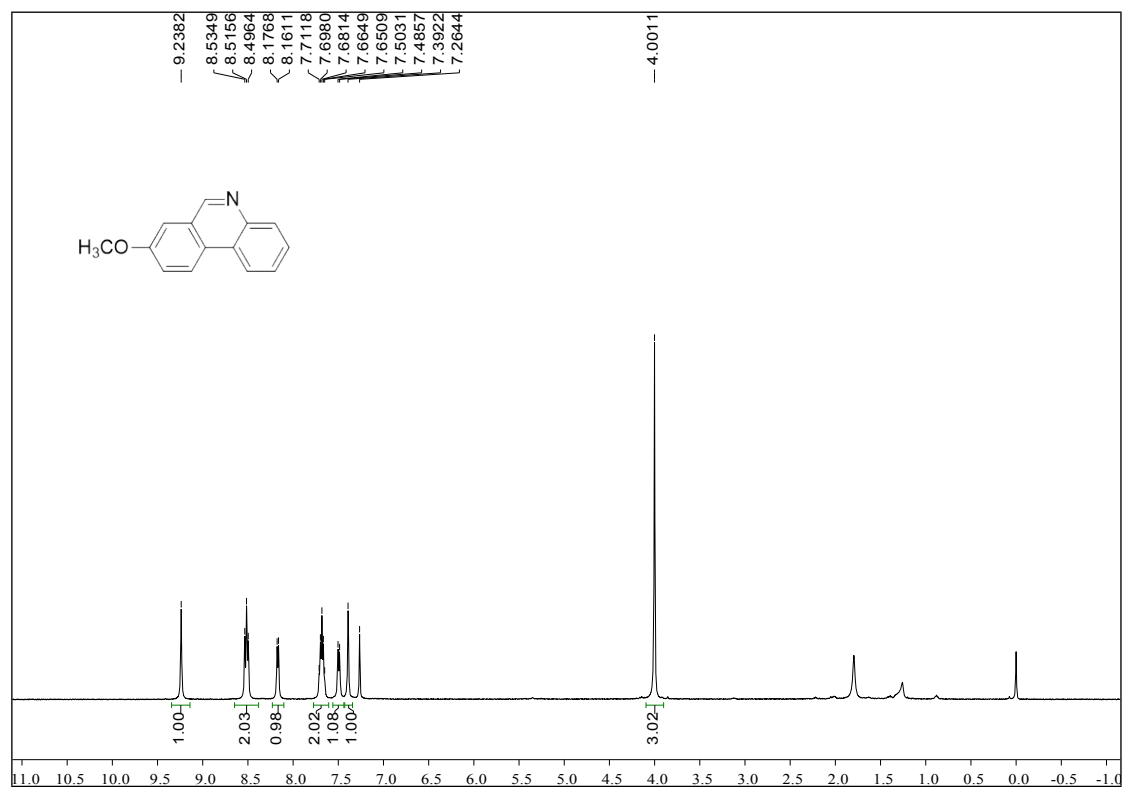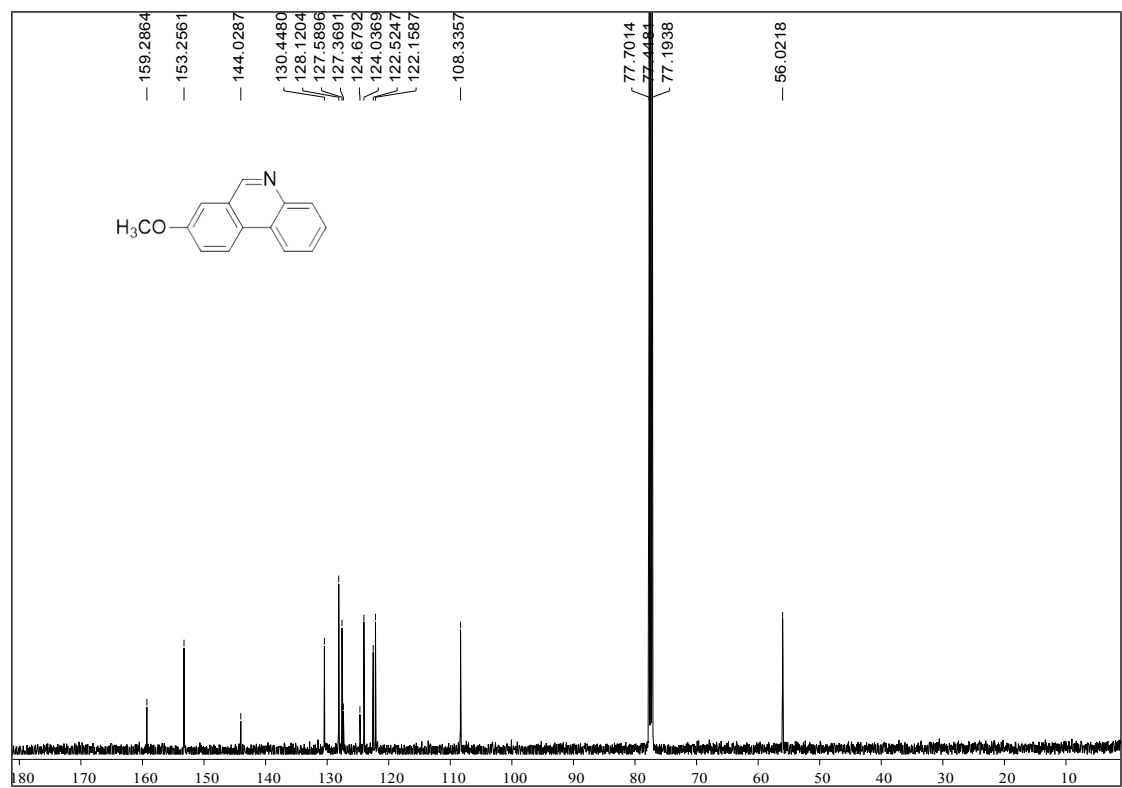



# Phenanthridine (3ja)

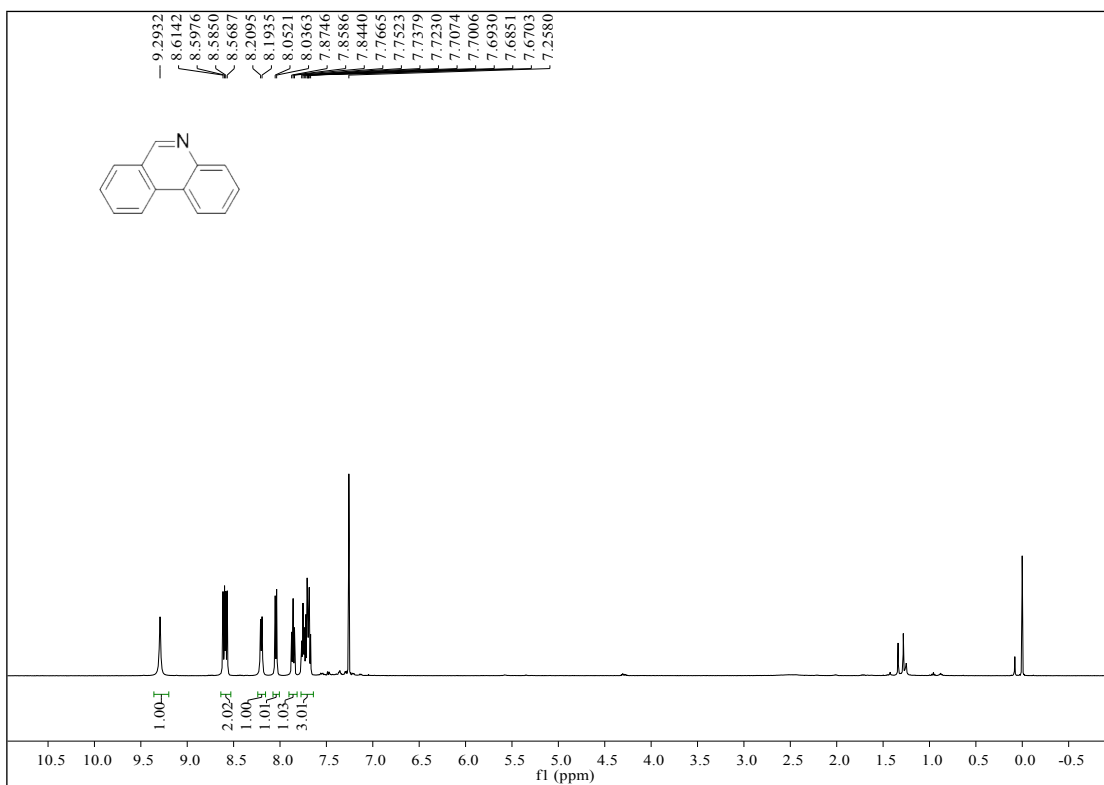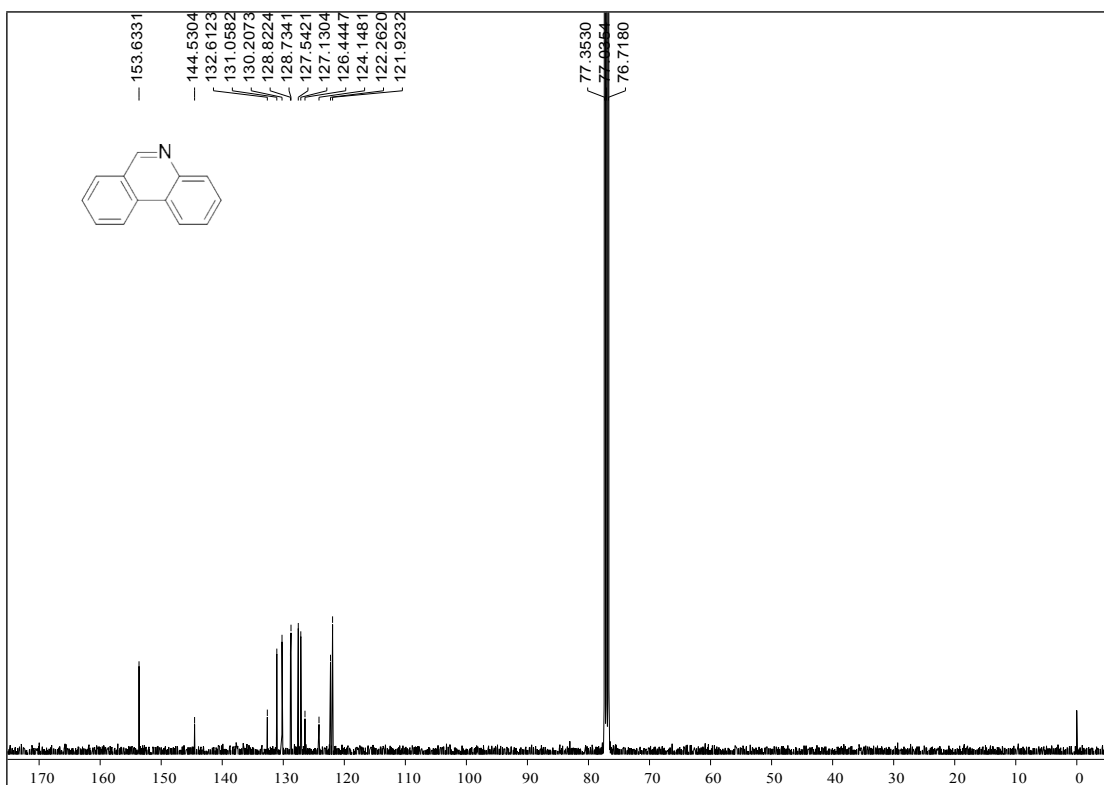

### 9-chlorophenanthridine (3ka)

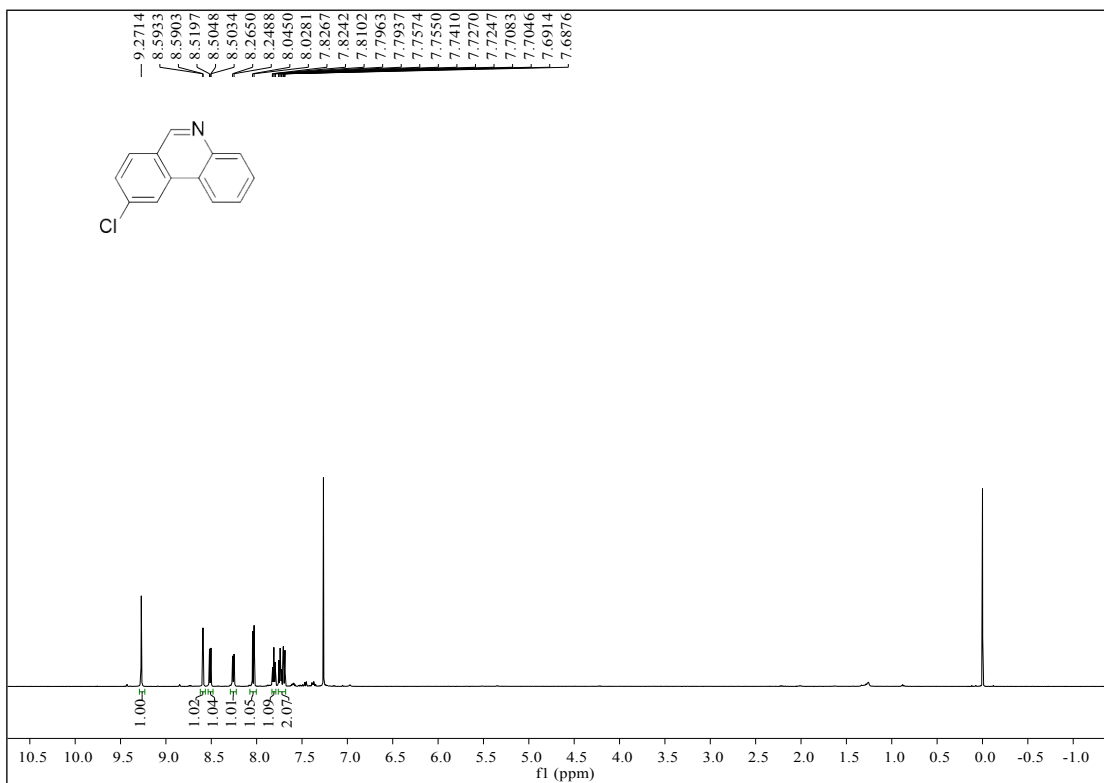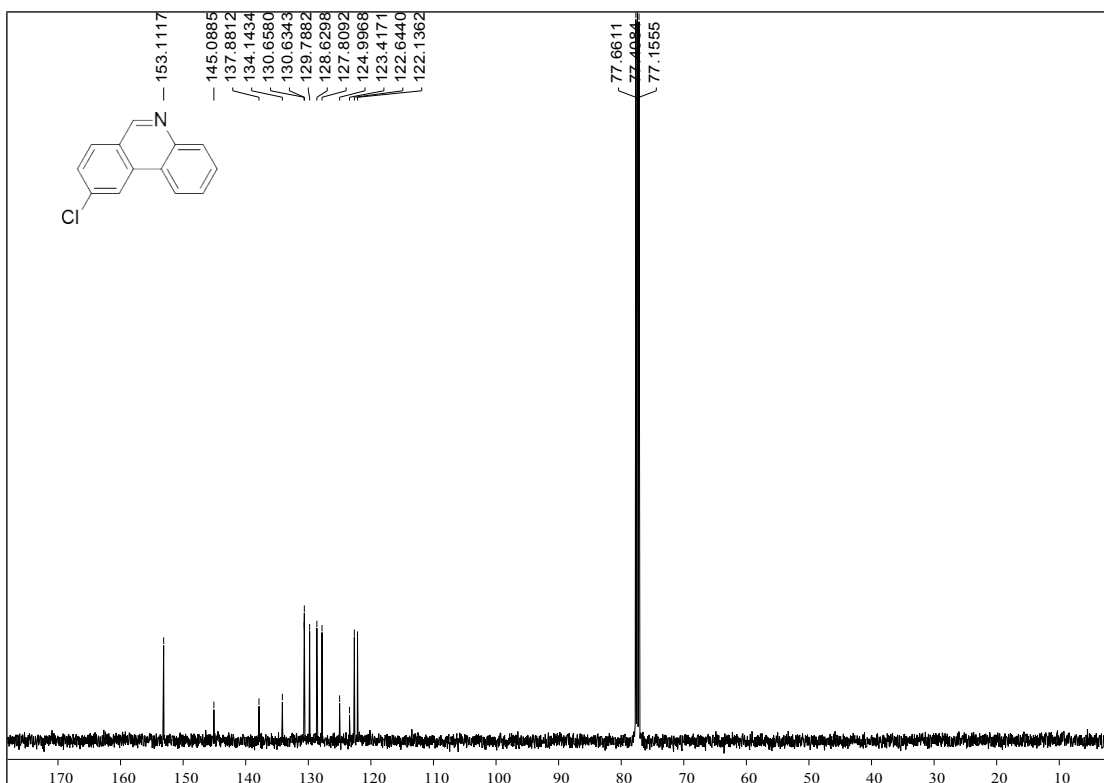

### 9-methylphenanthridine (31a)

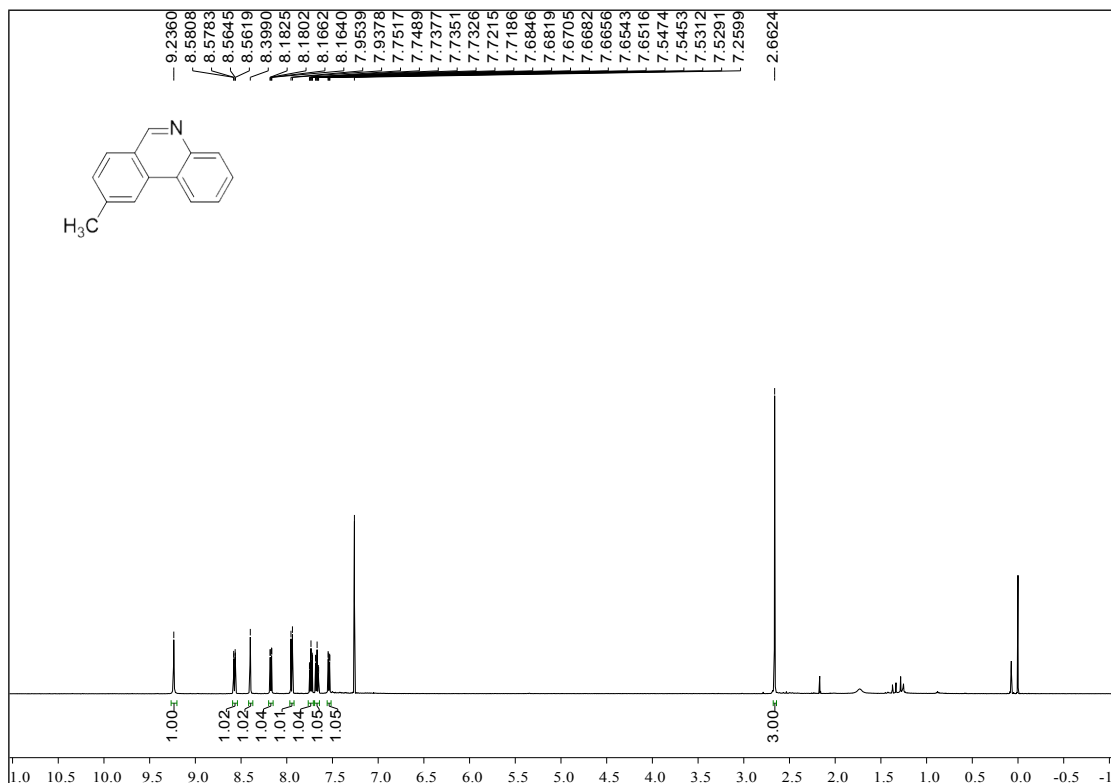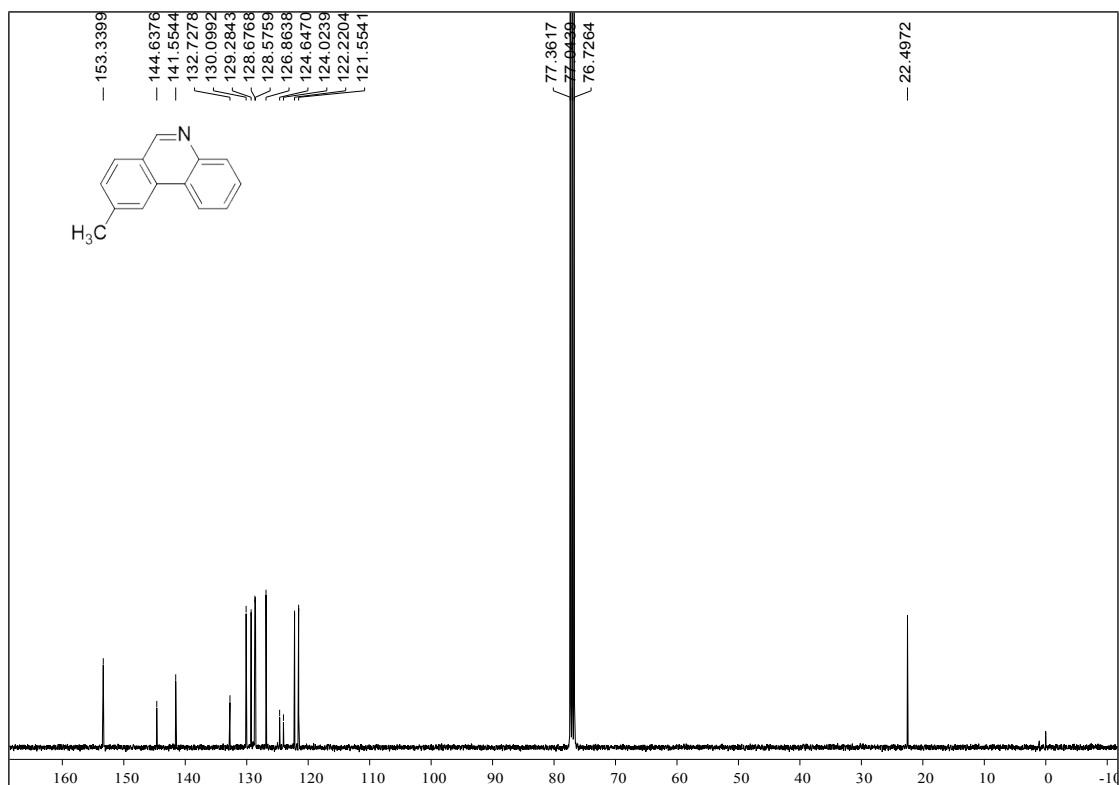

# 7-phenylphenanthridine (3jaa)

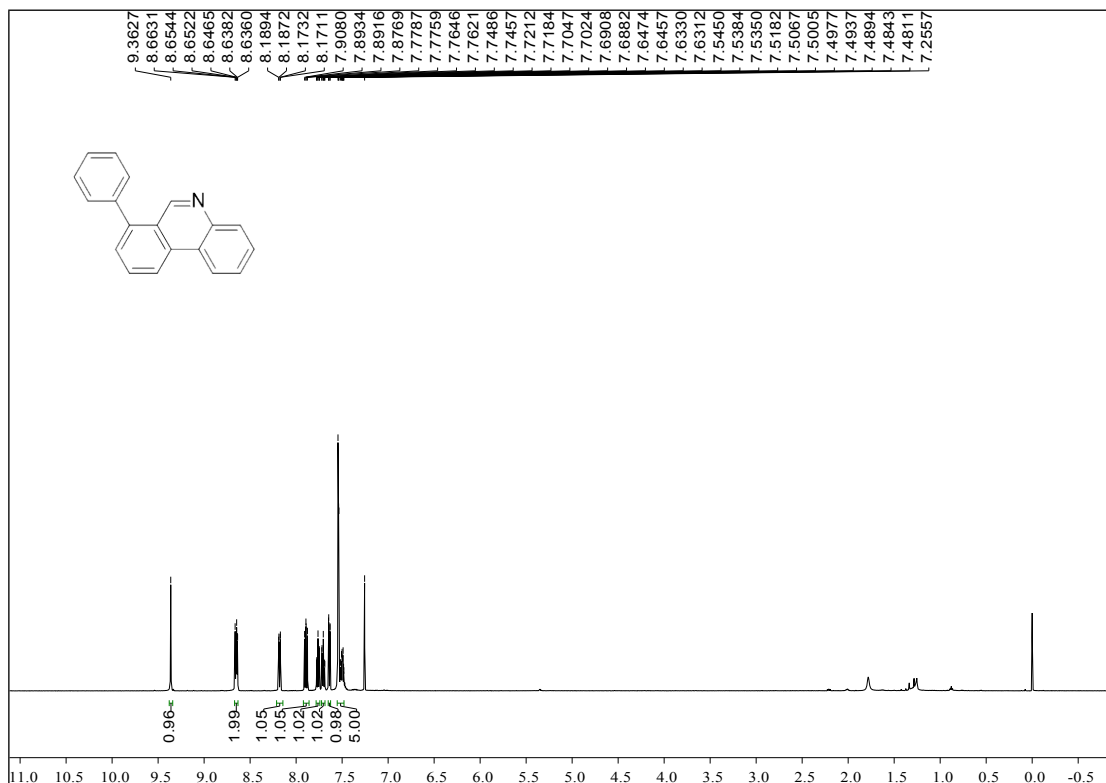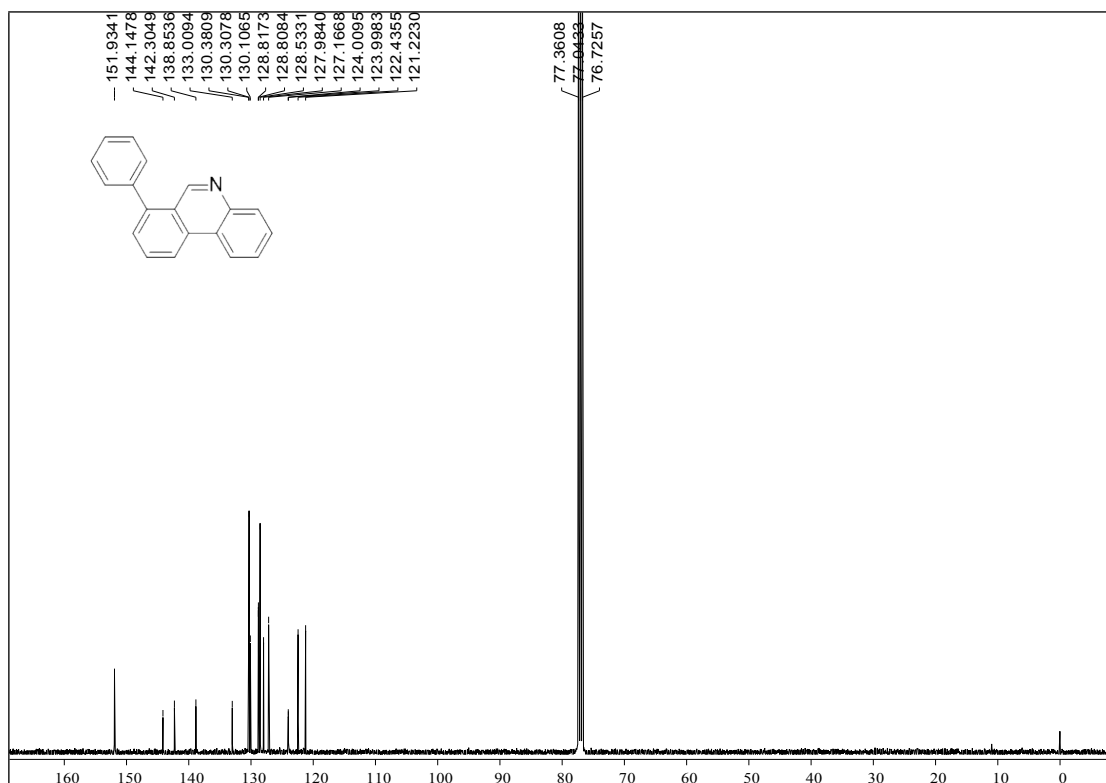

### 9-methyl-7-phenylphenanthridine (3kaa)

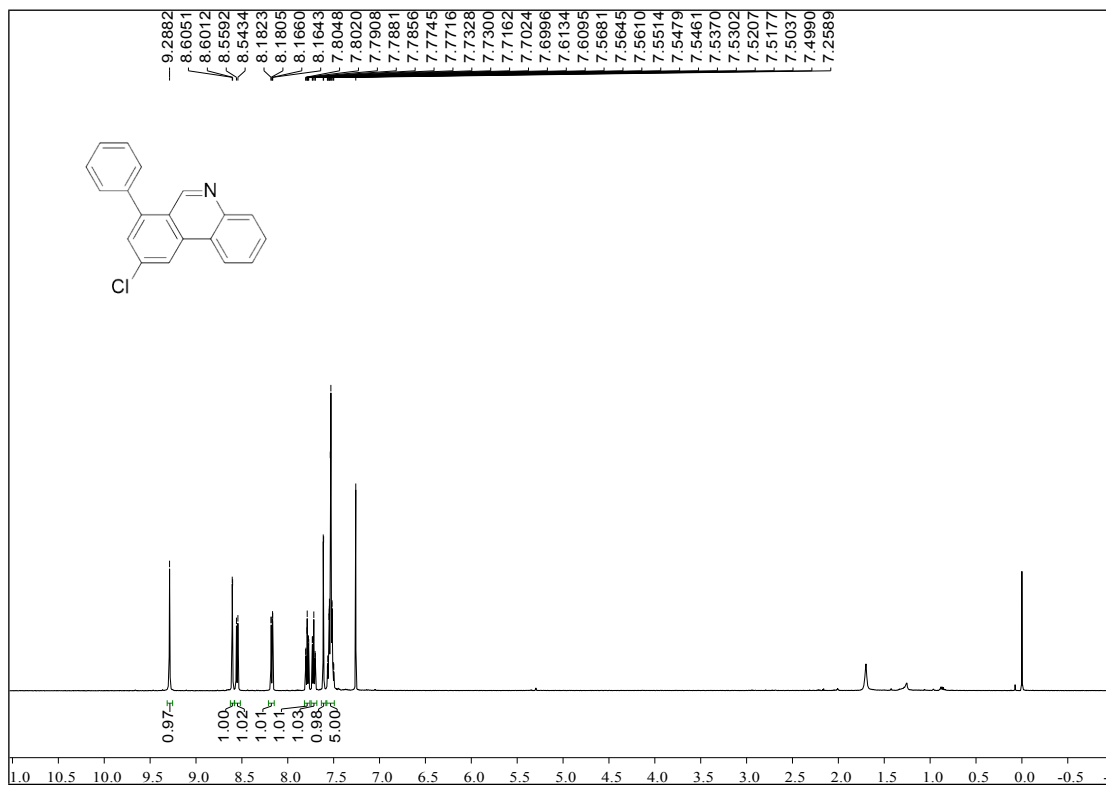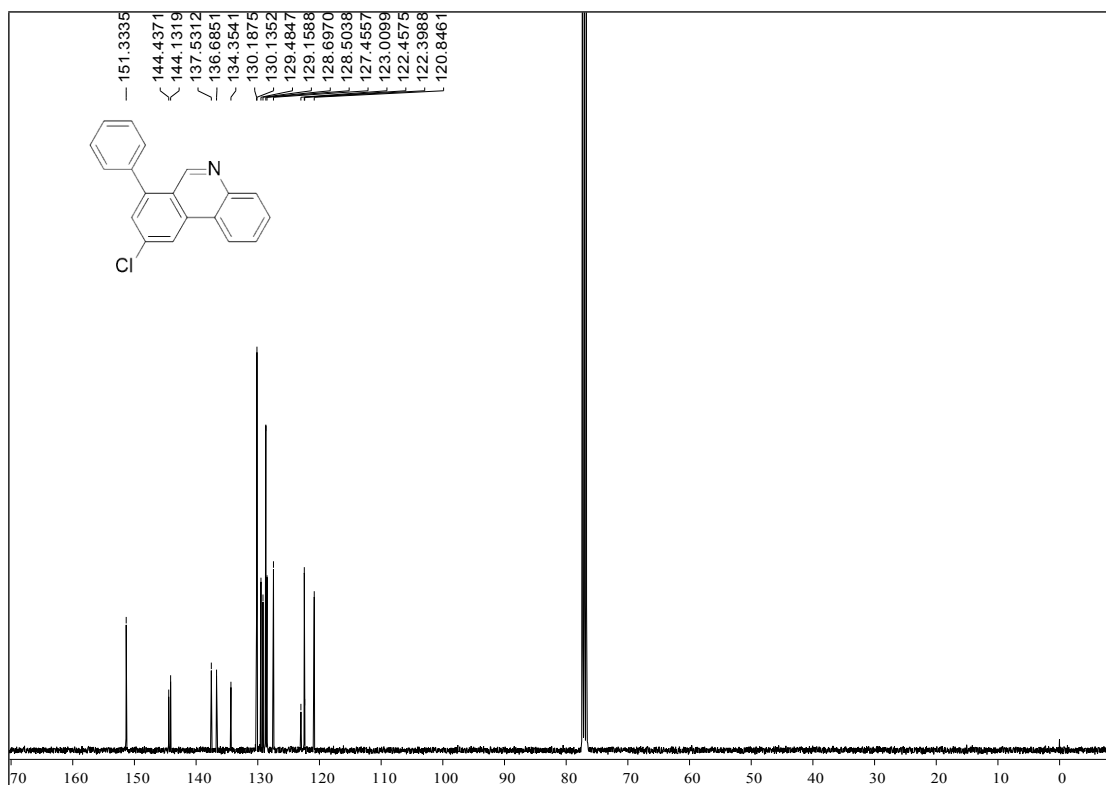

### 9-methyl-7-phenylphenanthridine (31aa)

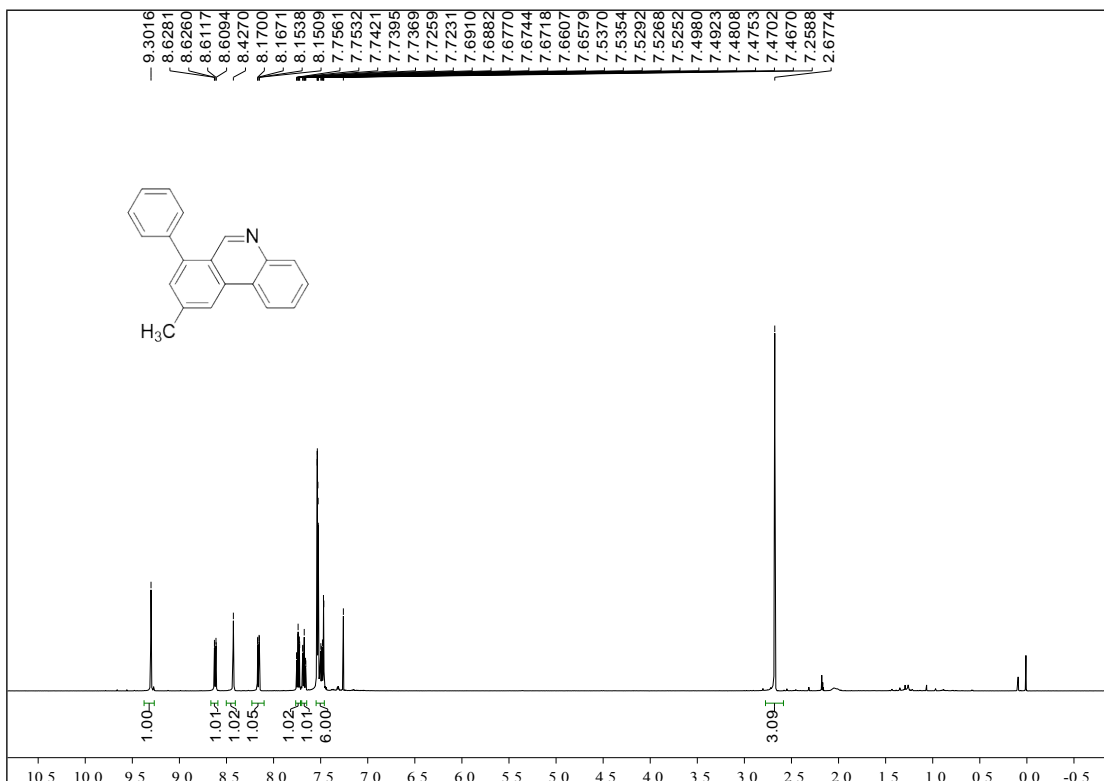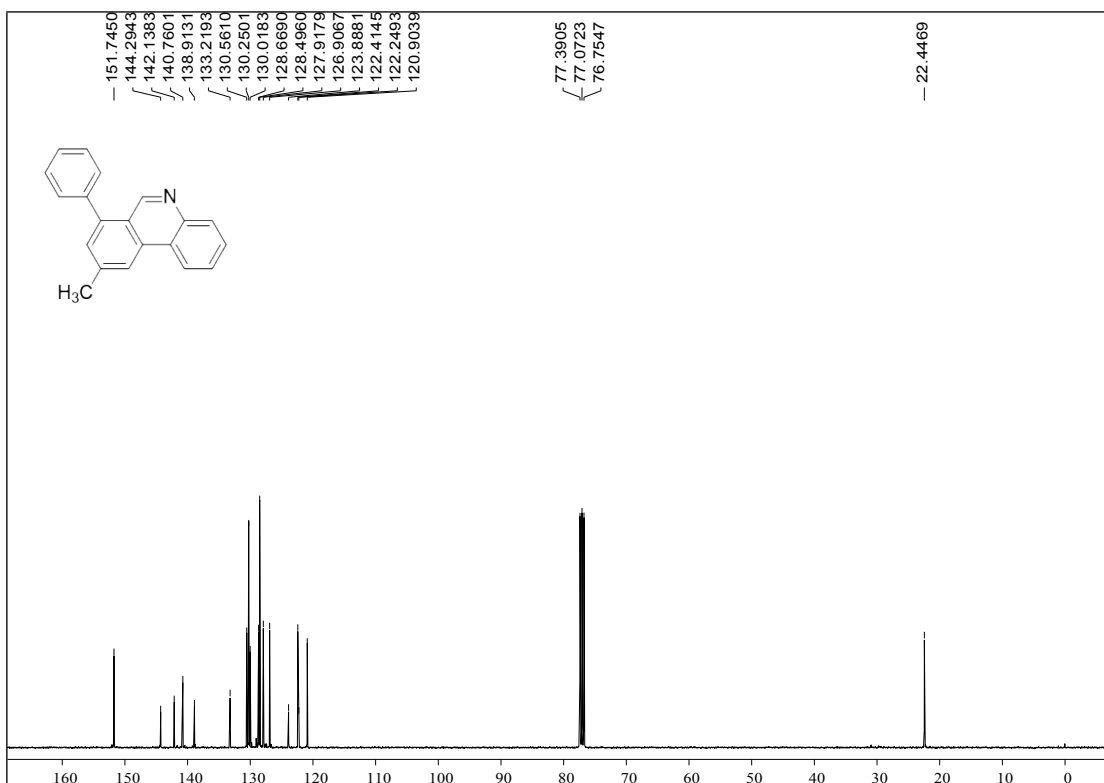

### 7-bromo-9-fluorophenanthridine (3ma)

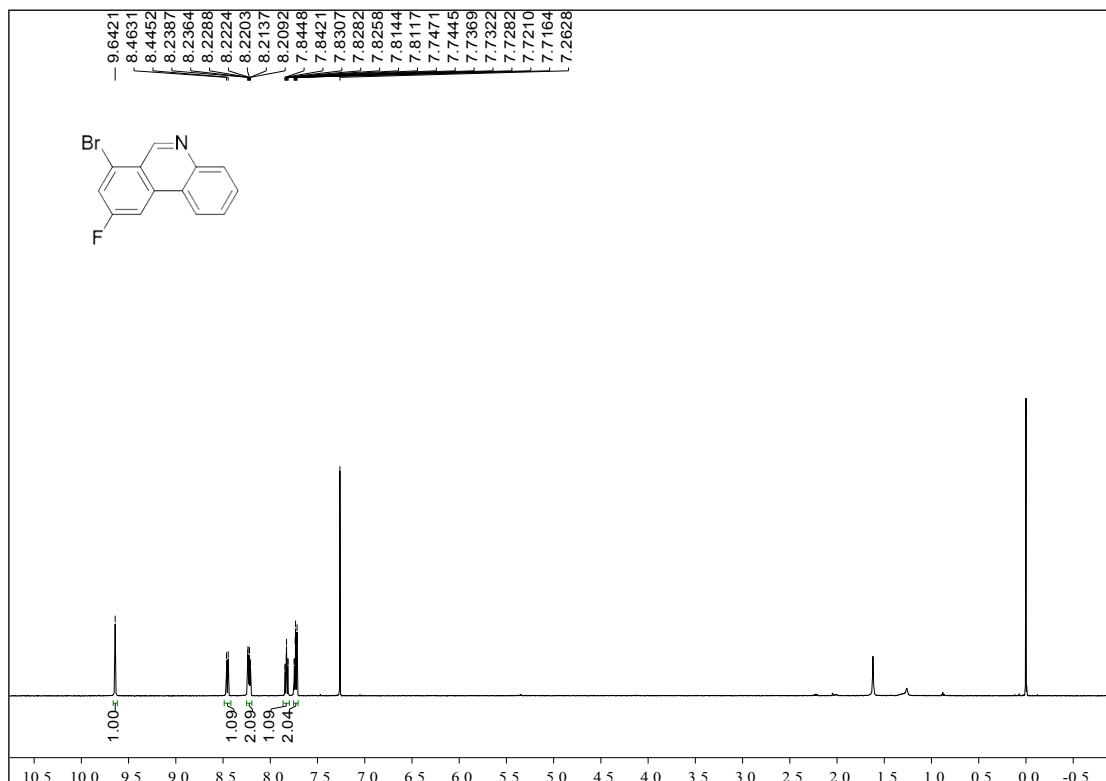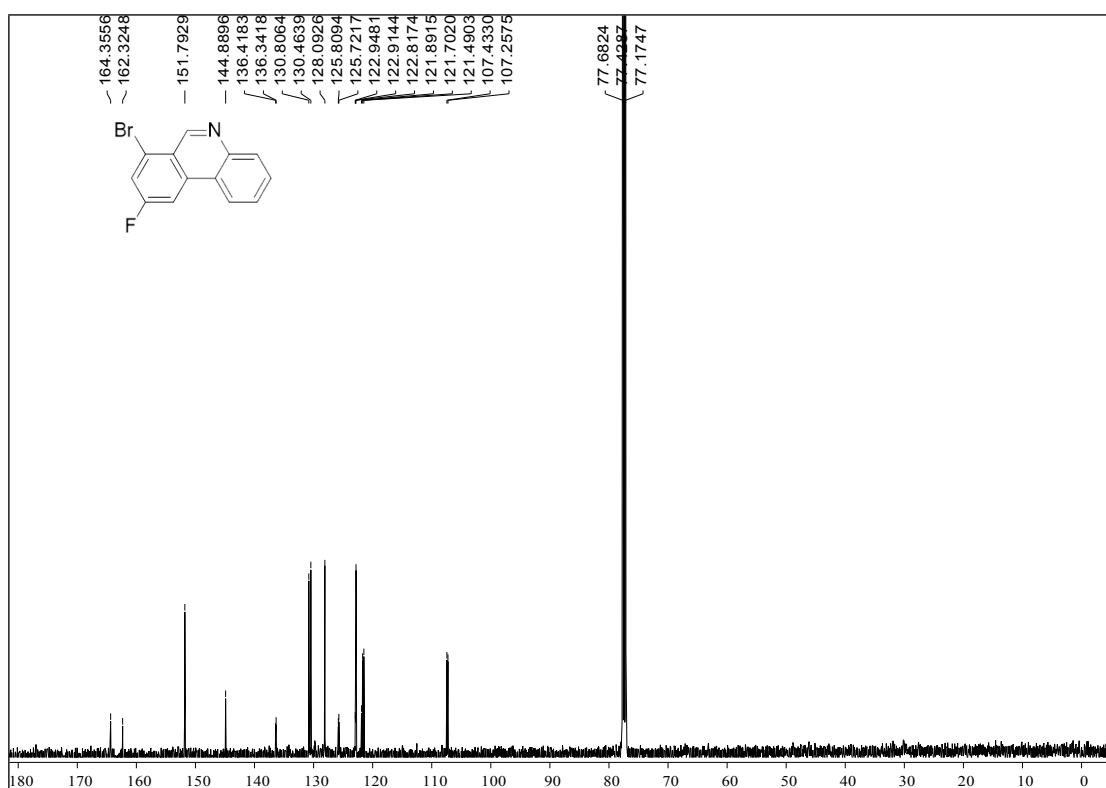

### 7-bromo-9-methylphenanthridine (3na)

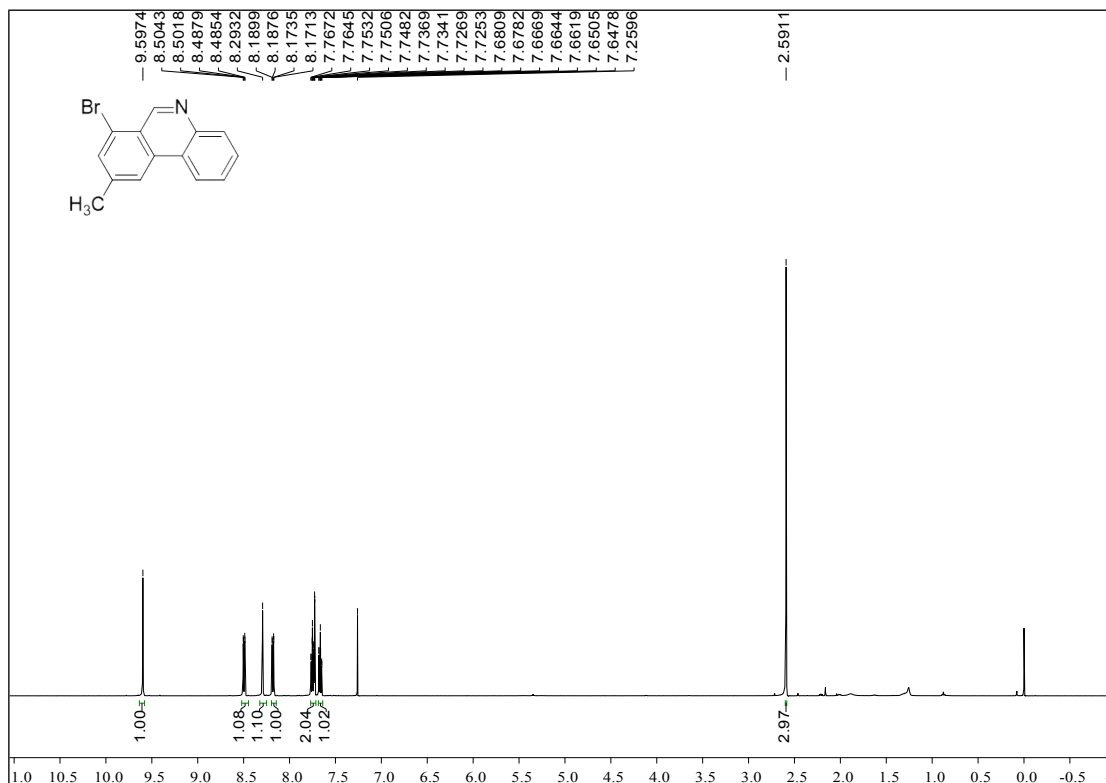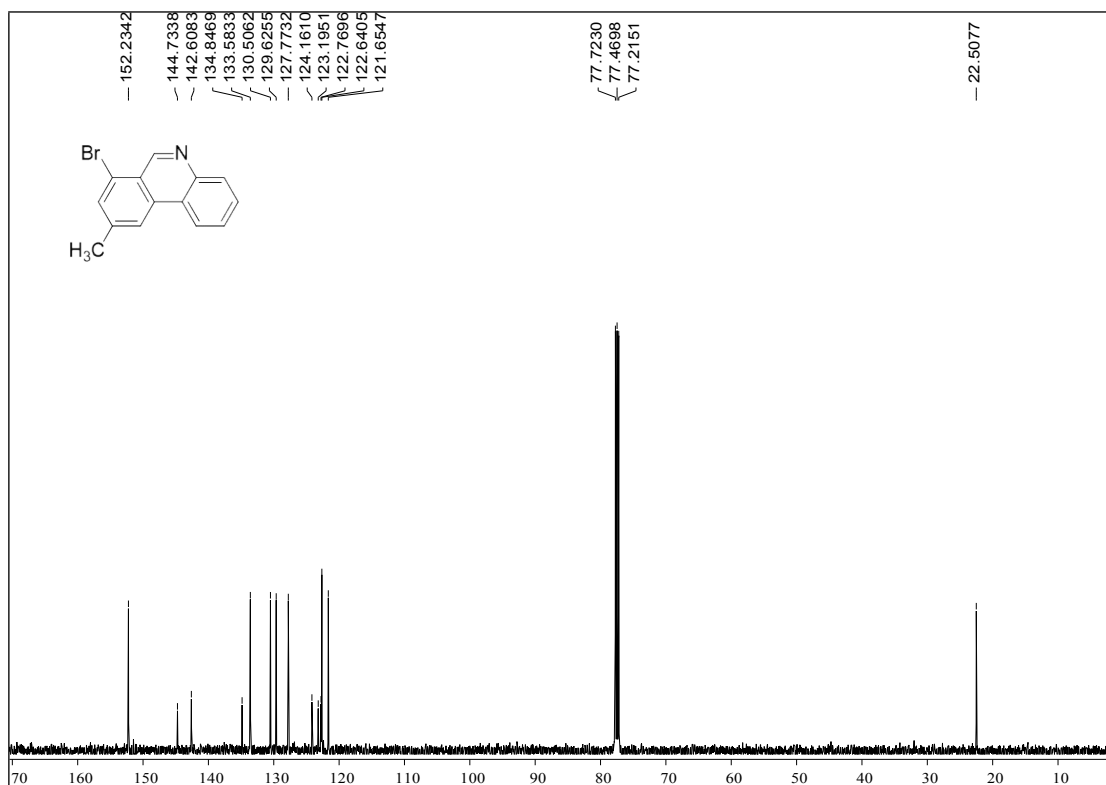



# 7,10-dichlorophenanthridine (30a)

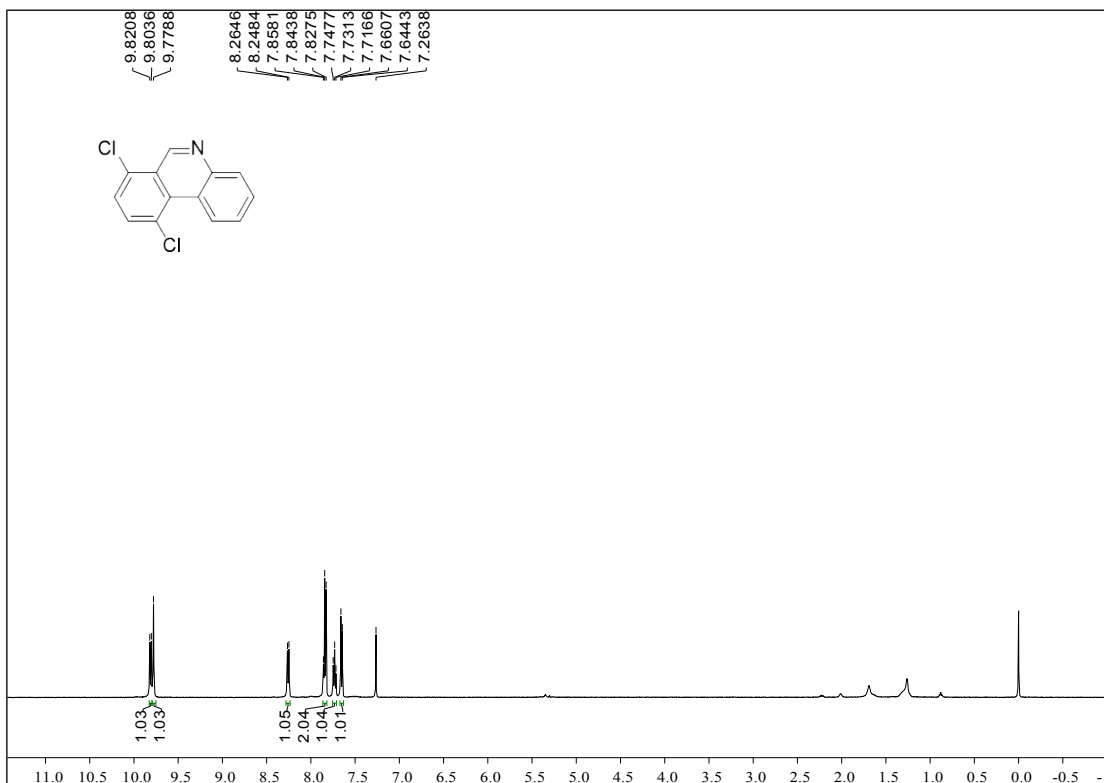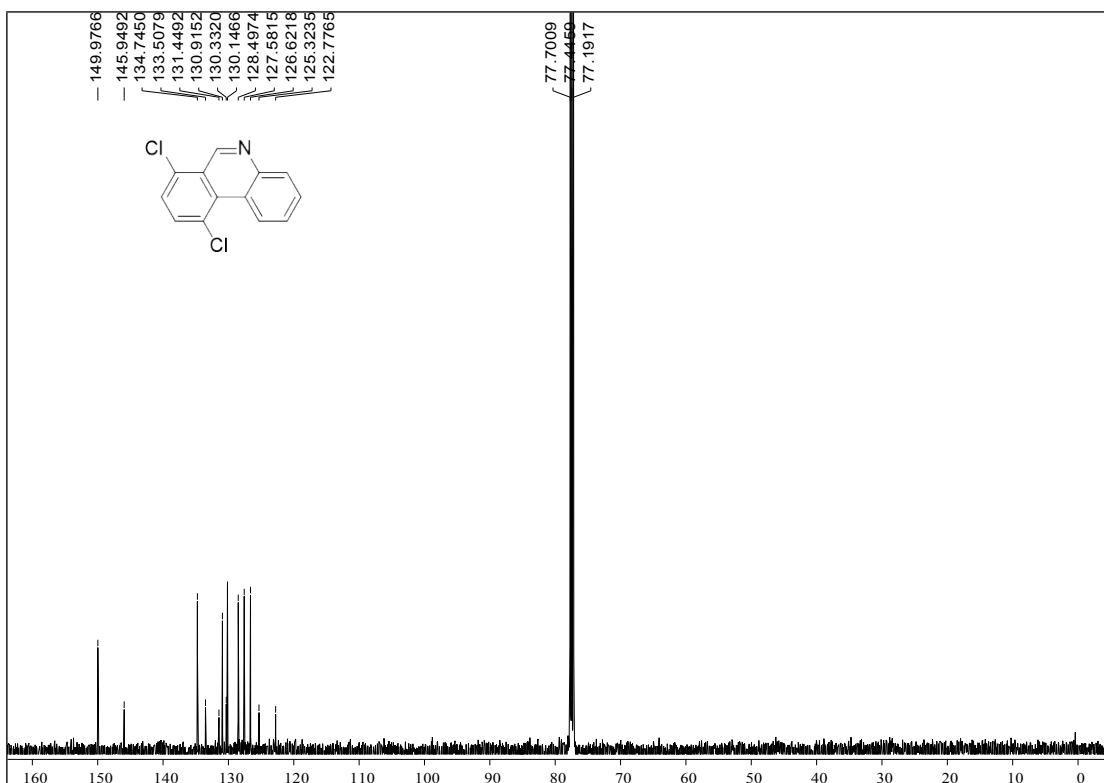

# 7,9-dichlorophenanthridine (3pa)

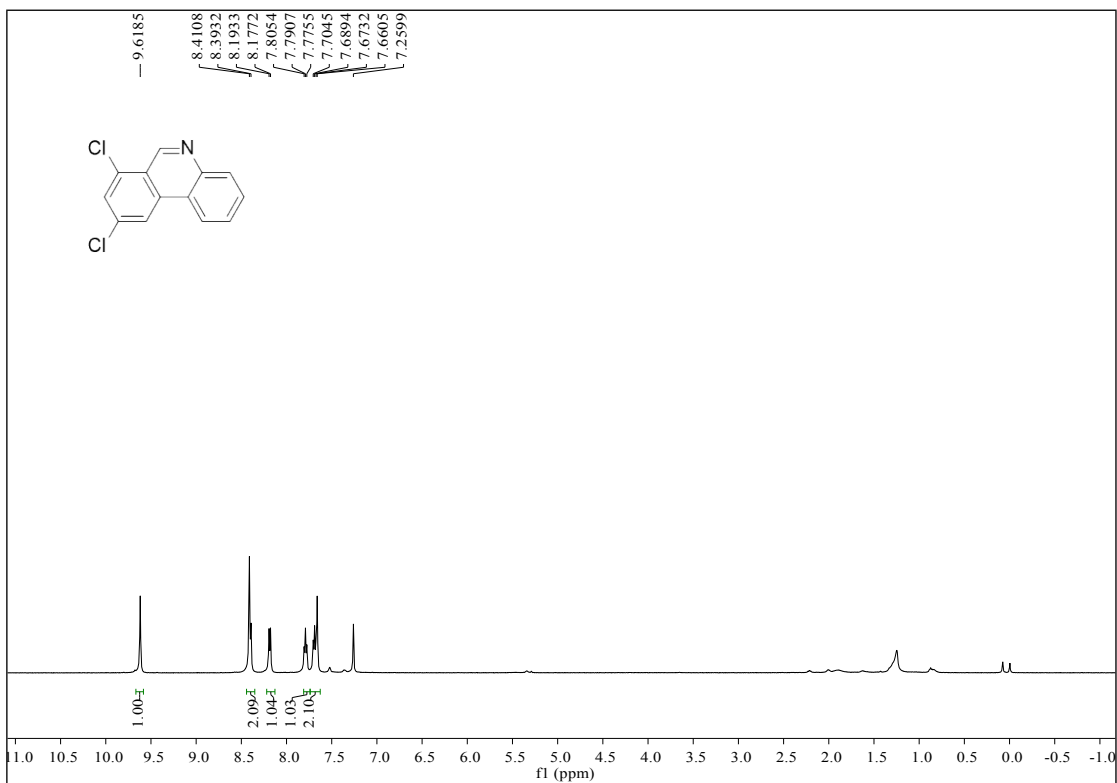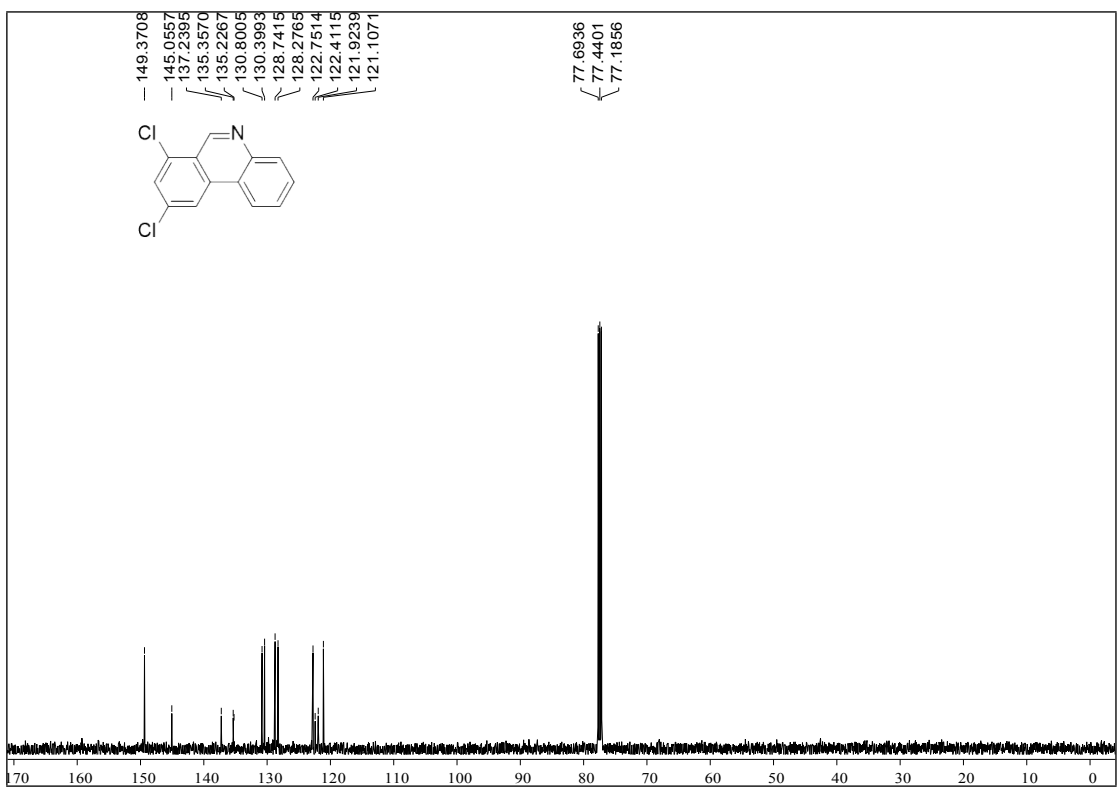

# 7,8-dichlorophenanthridine (3qa)

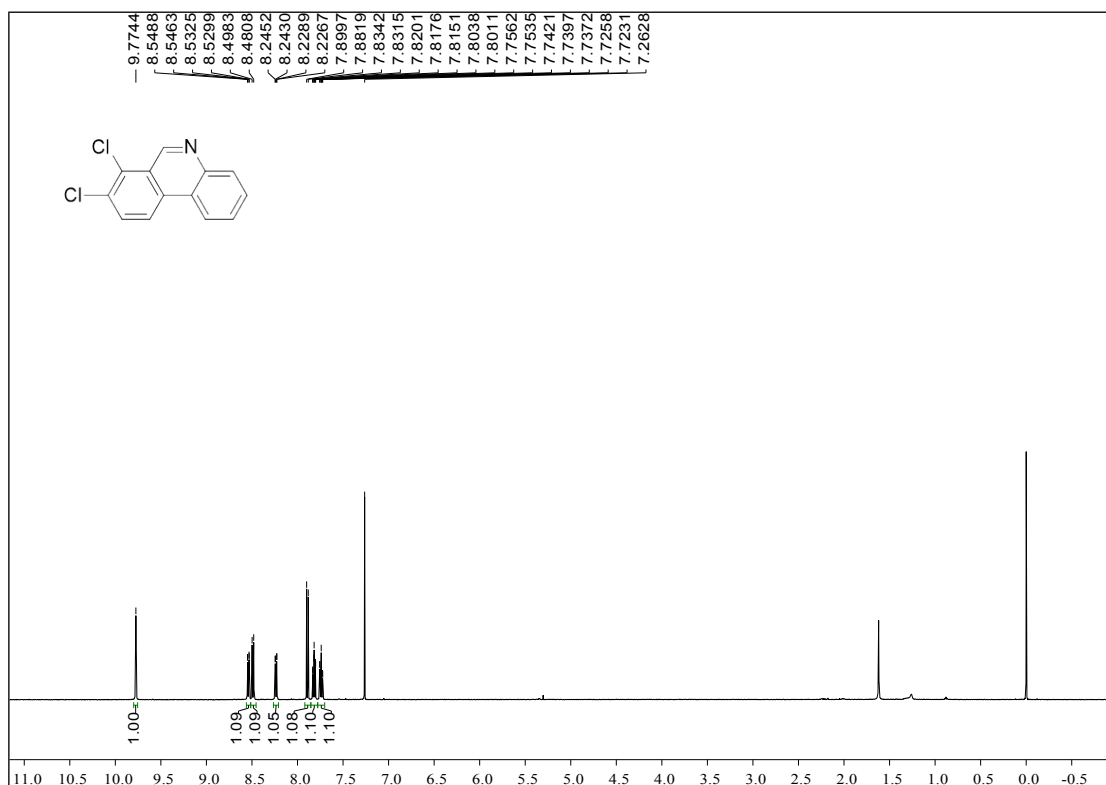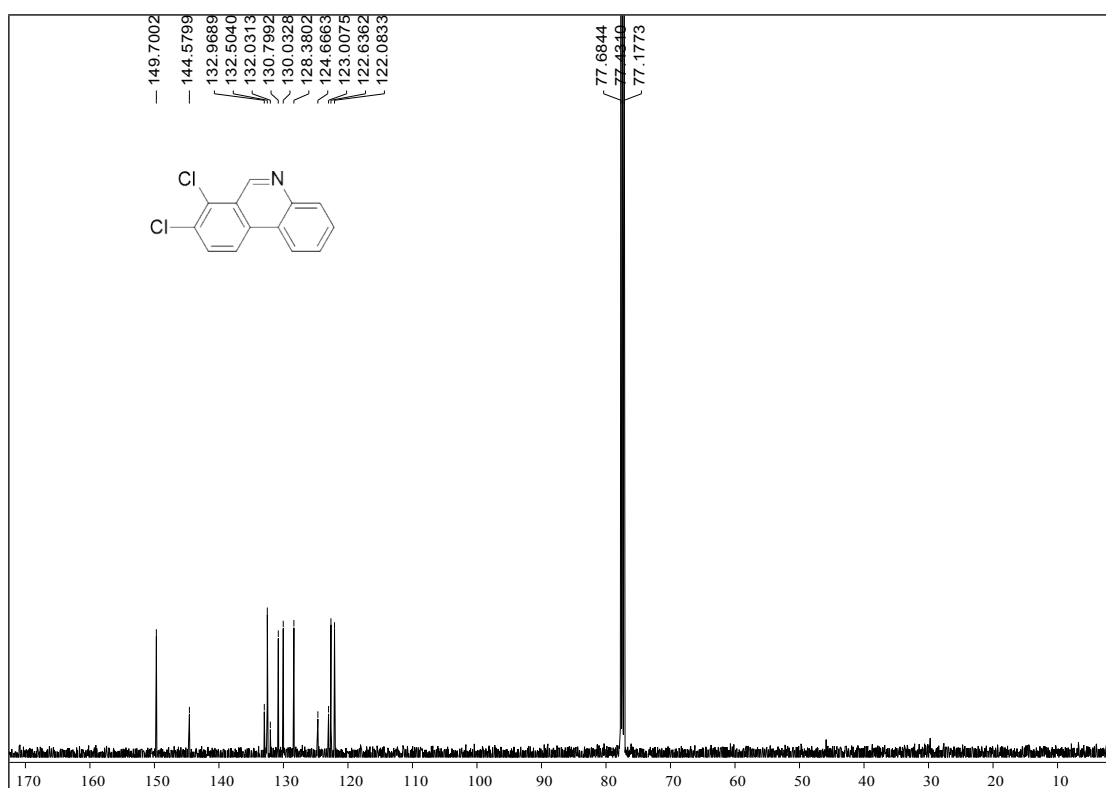

### 8,9-dimethoxyphenanthridine (3ra)

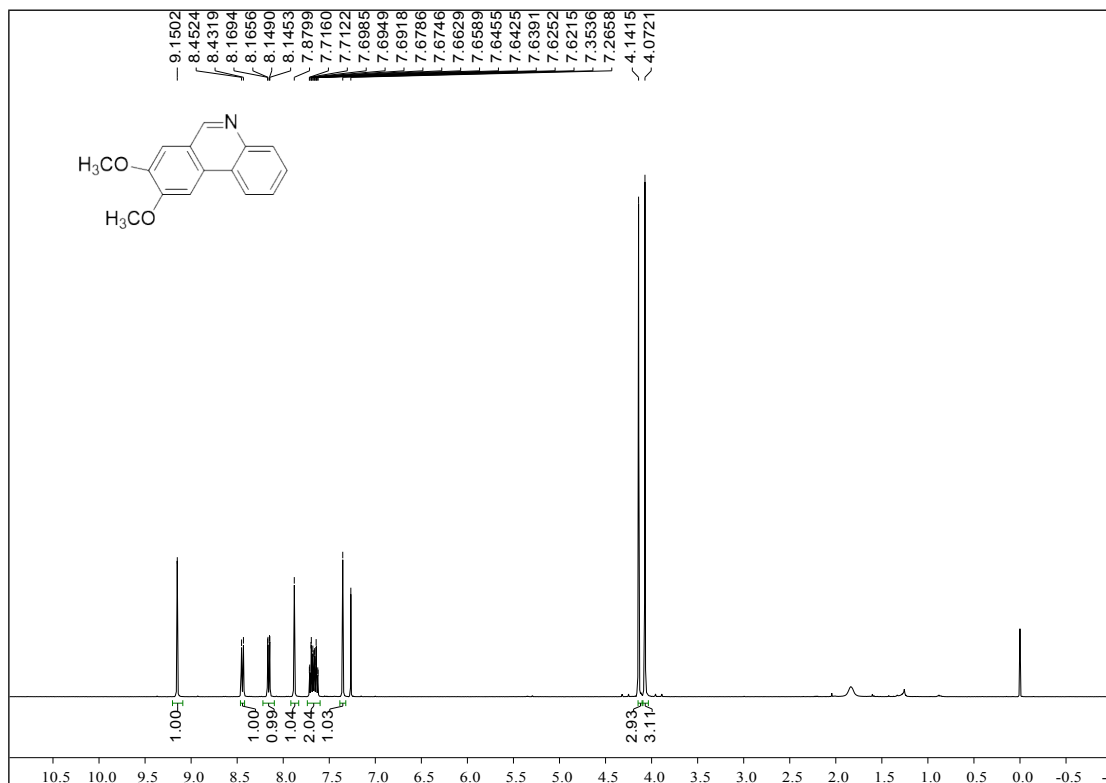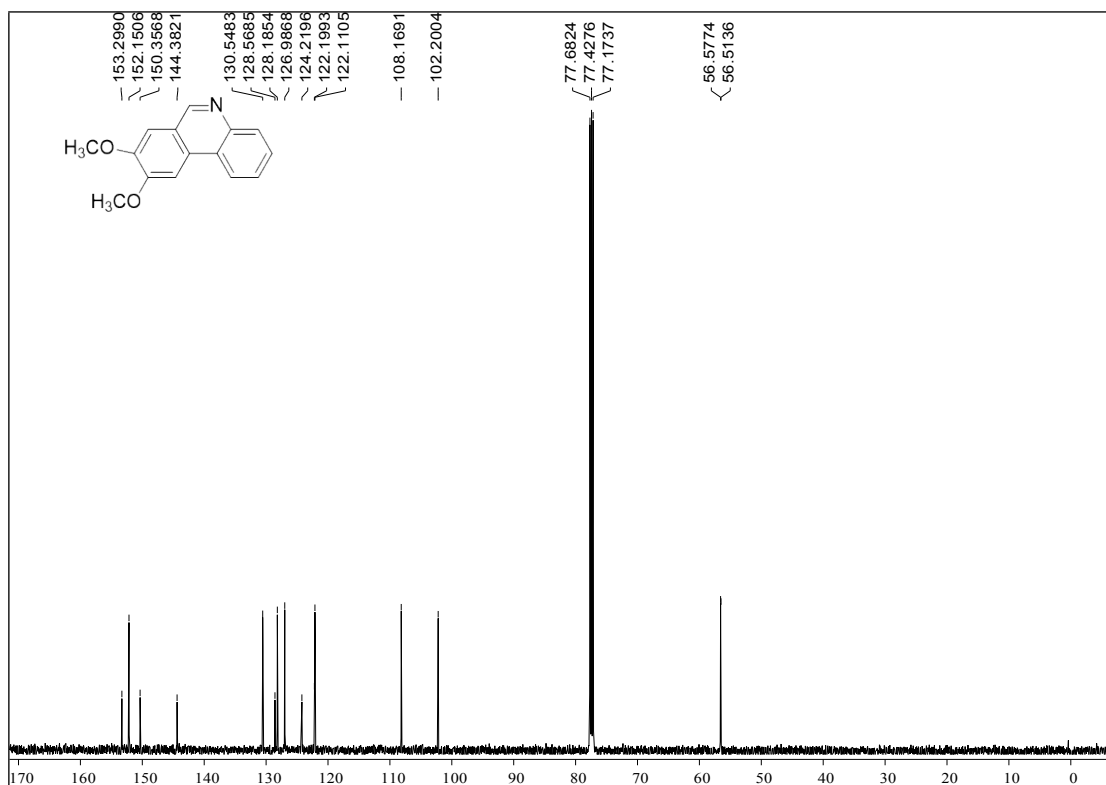

# [1,3]dioxolo[4,5-j]phenanthridine (3sa)

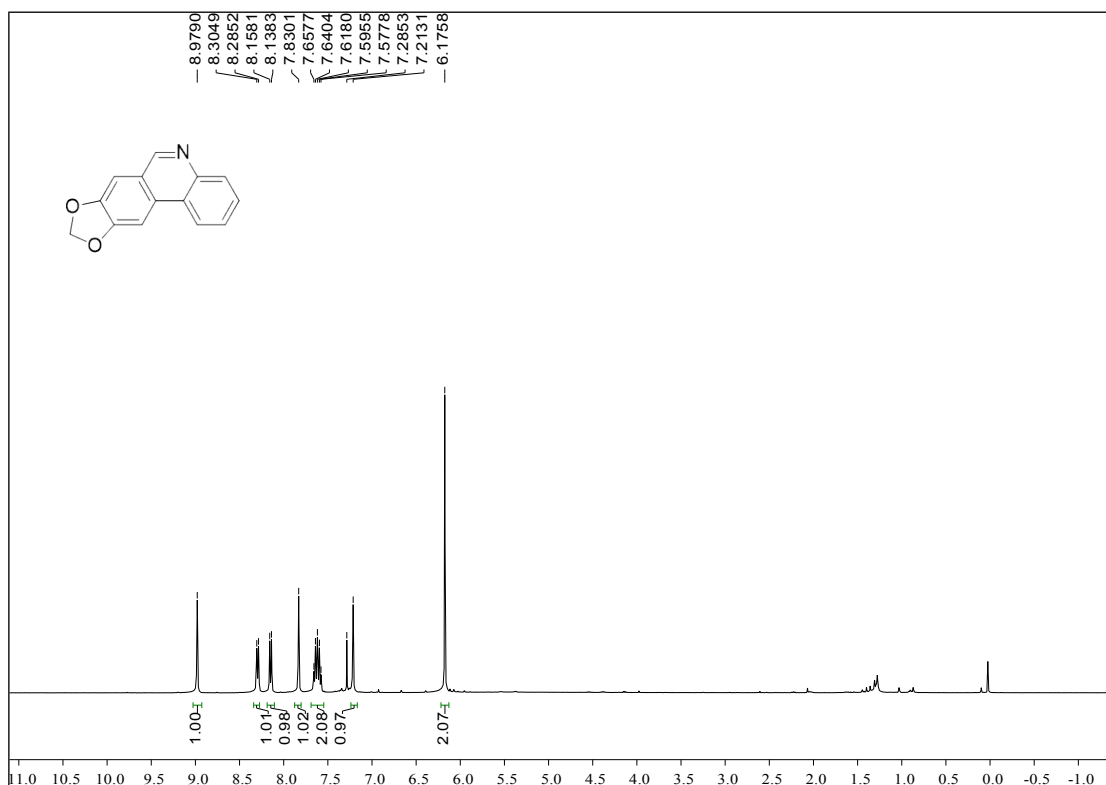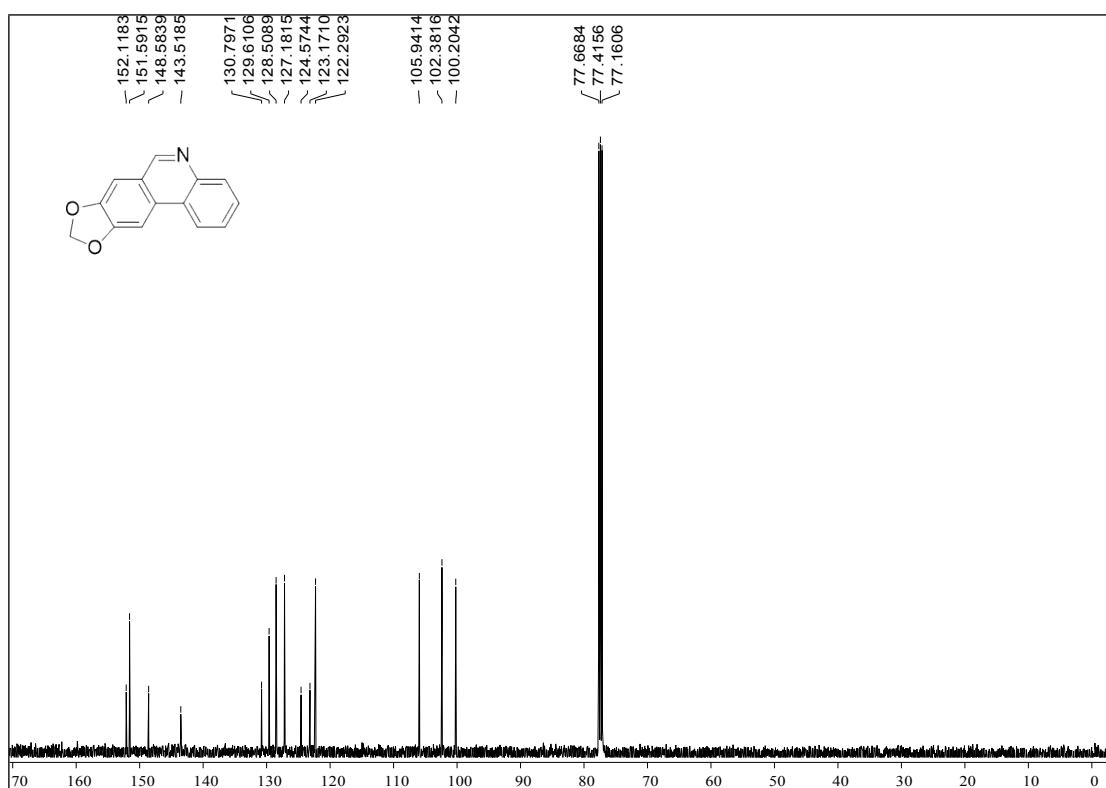

### 10-bromo-[1,3]dioxolo[4,5-i]phenanthridine (3ta)

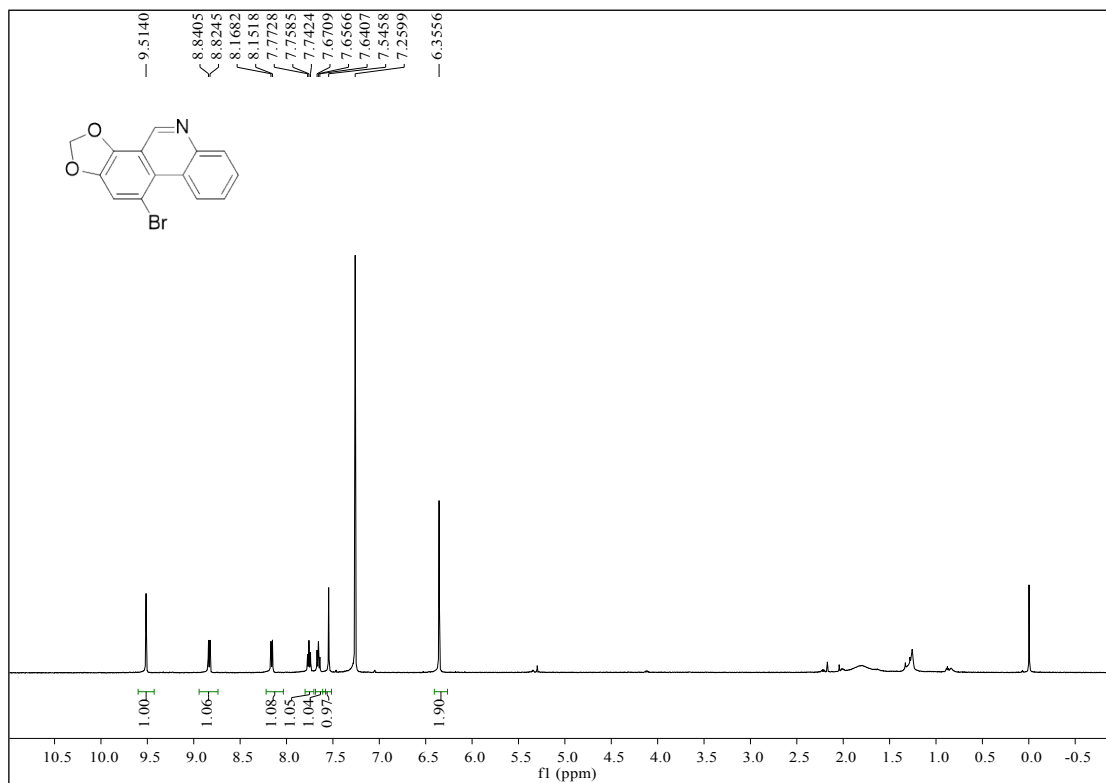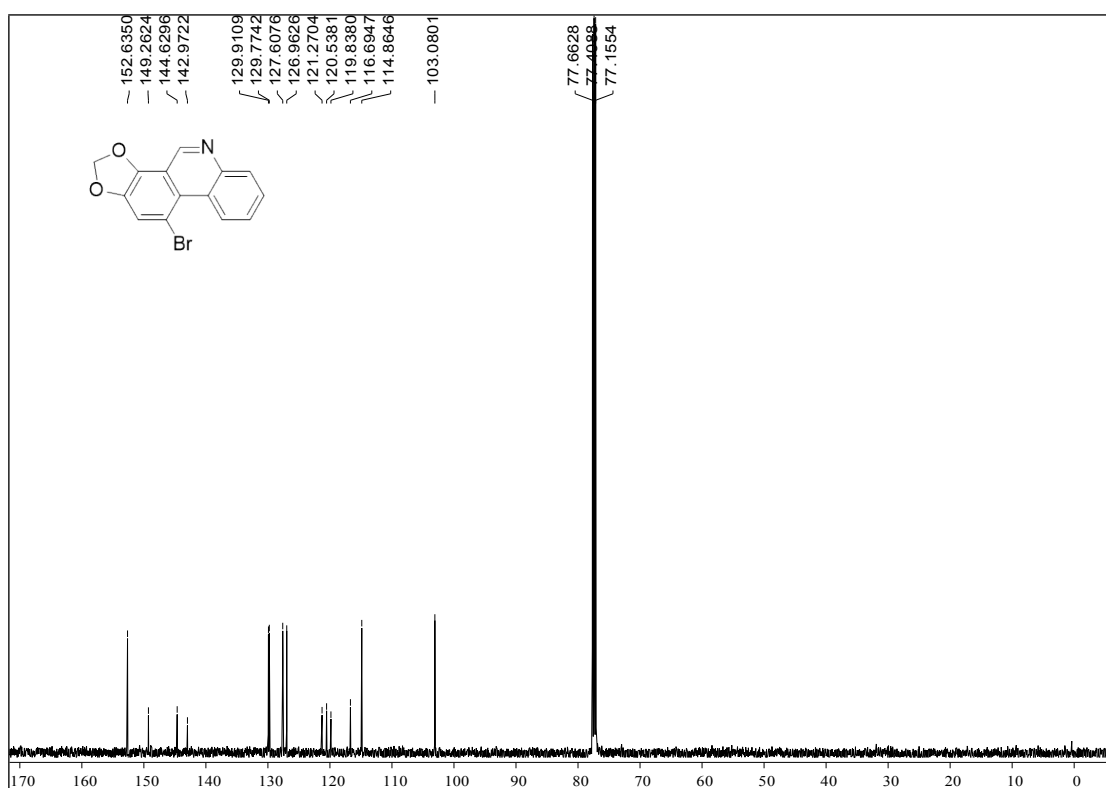

# benzo[k]phenanthridine (3ua)

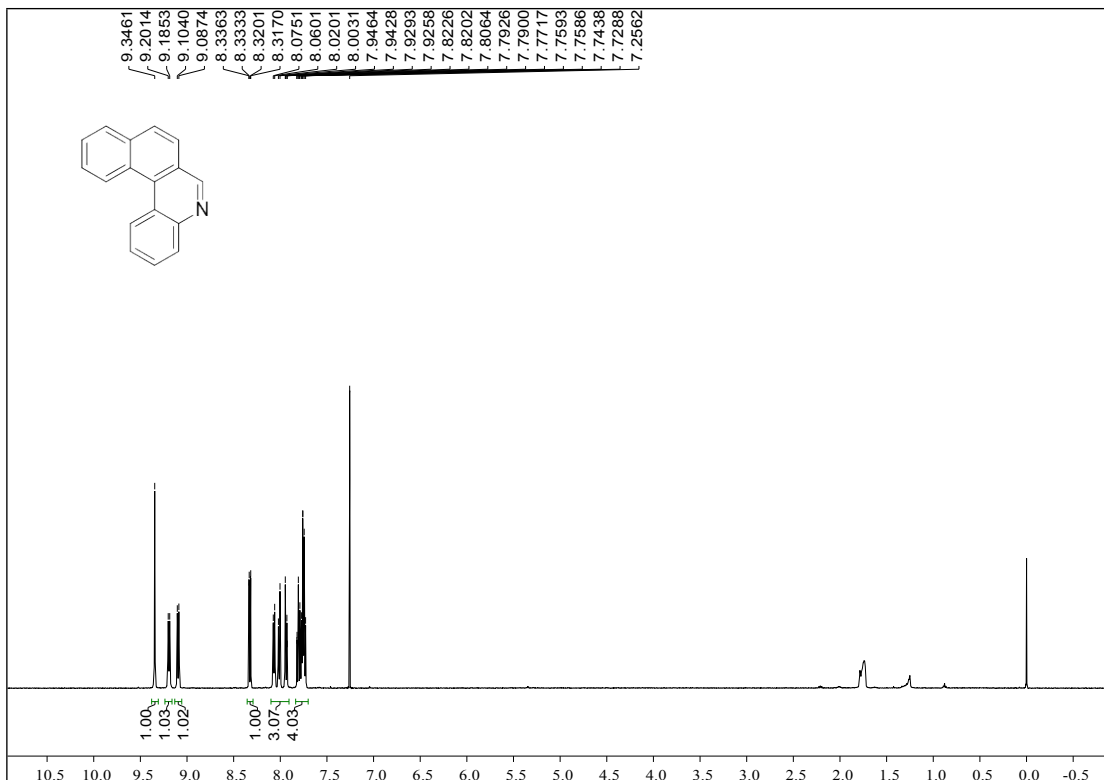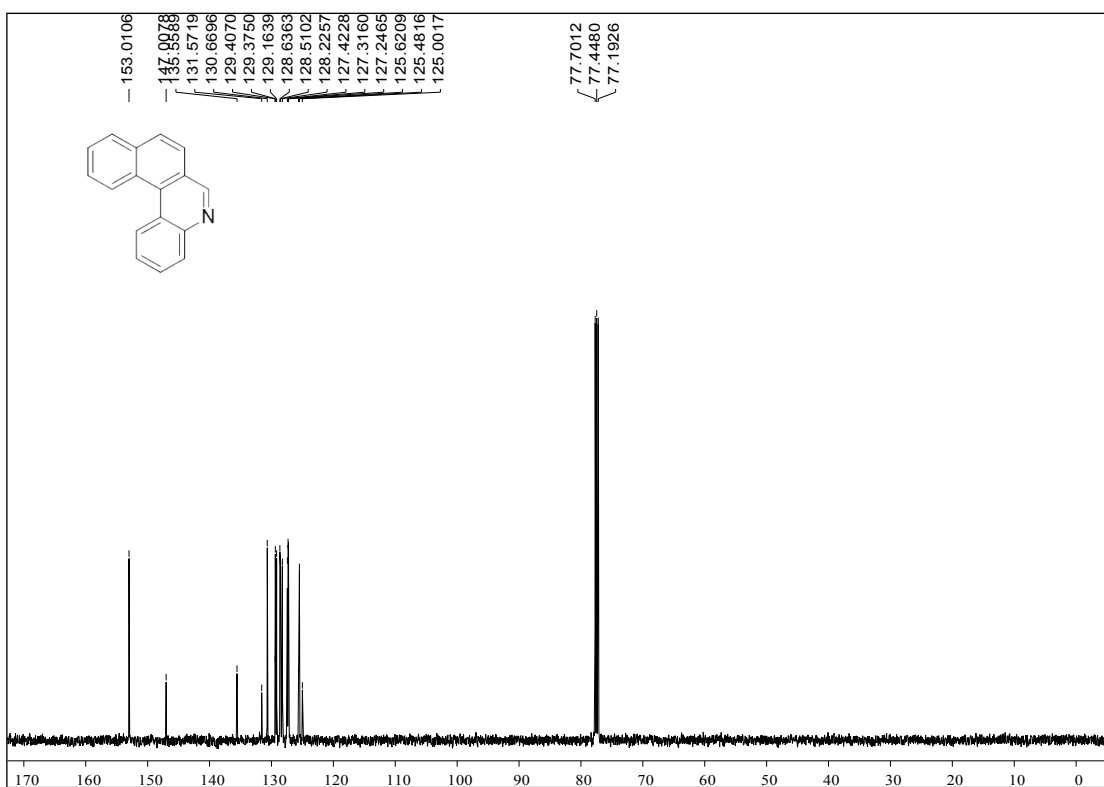

### 7-chloro-1-fluorophenanthridine (3ab)

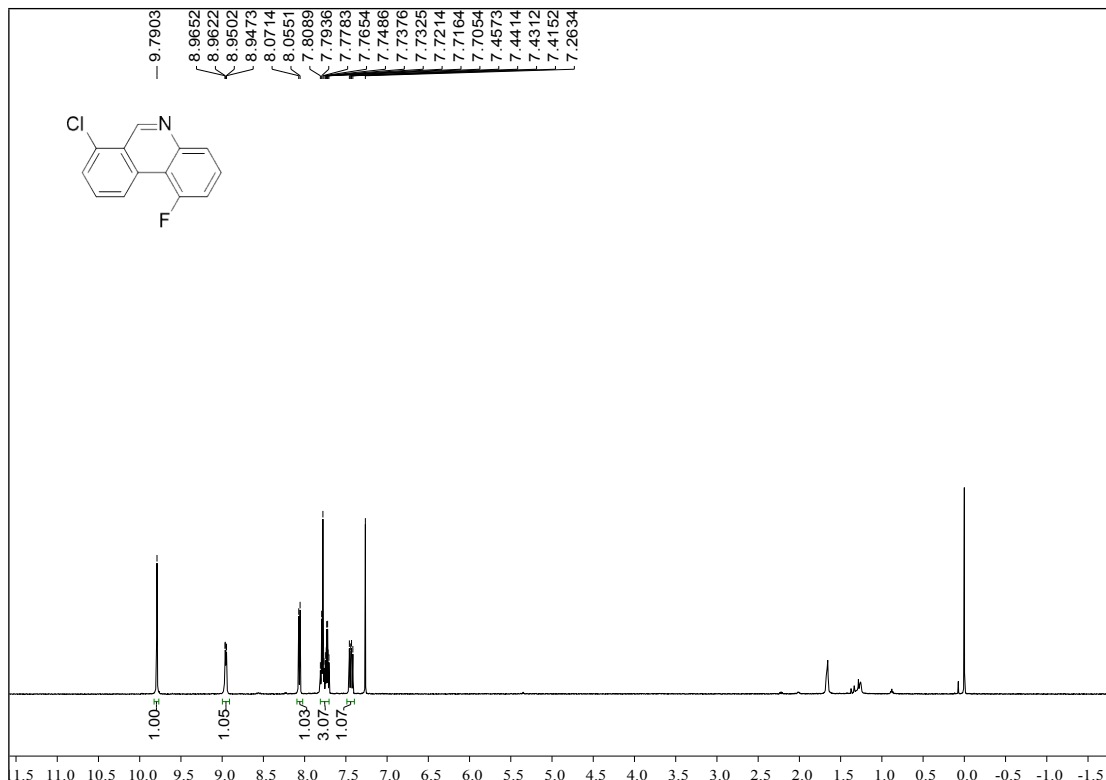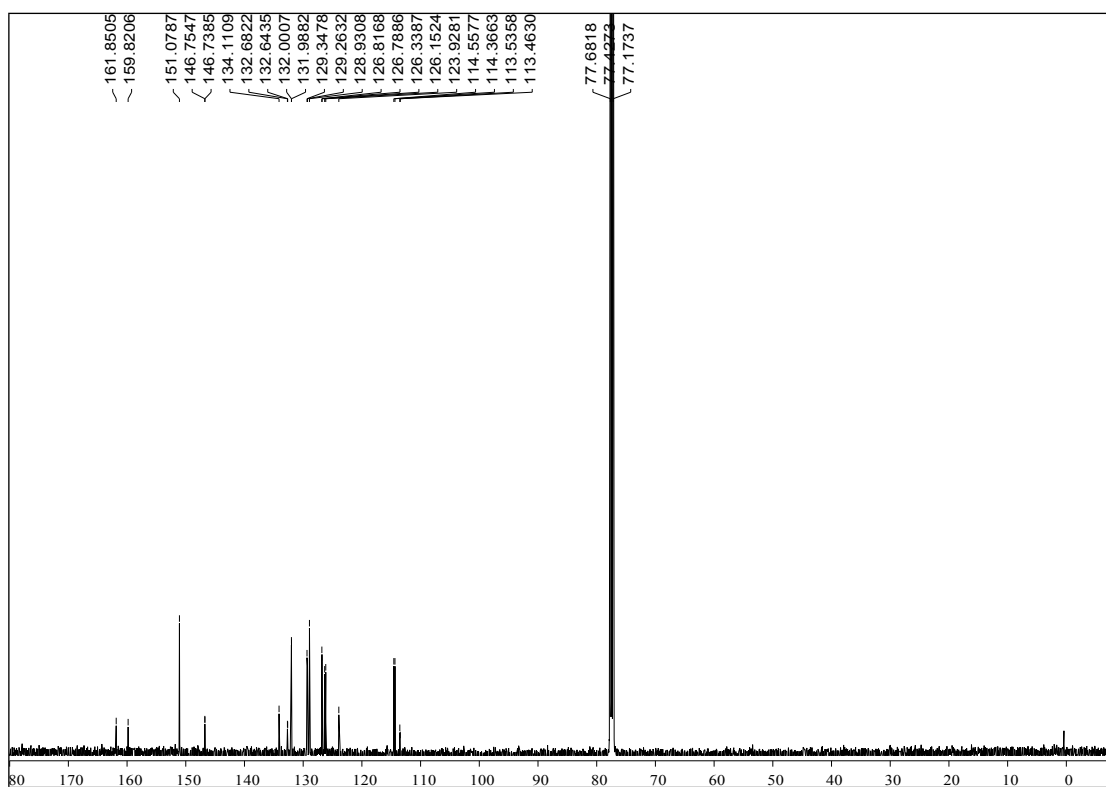



### 1,7-dichlorophenanthridine (3ac)

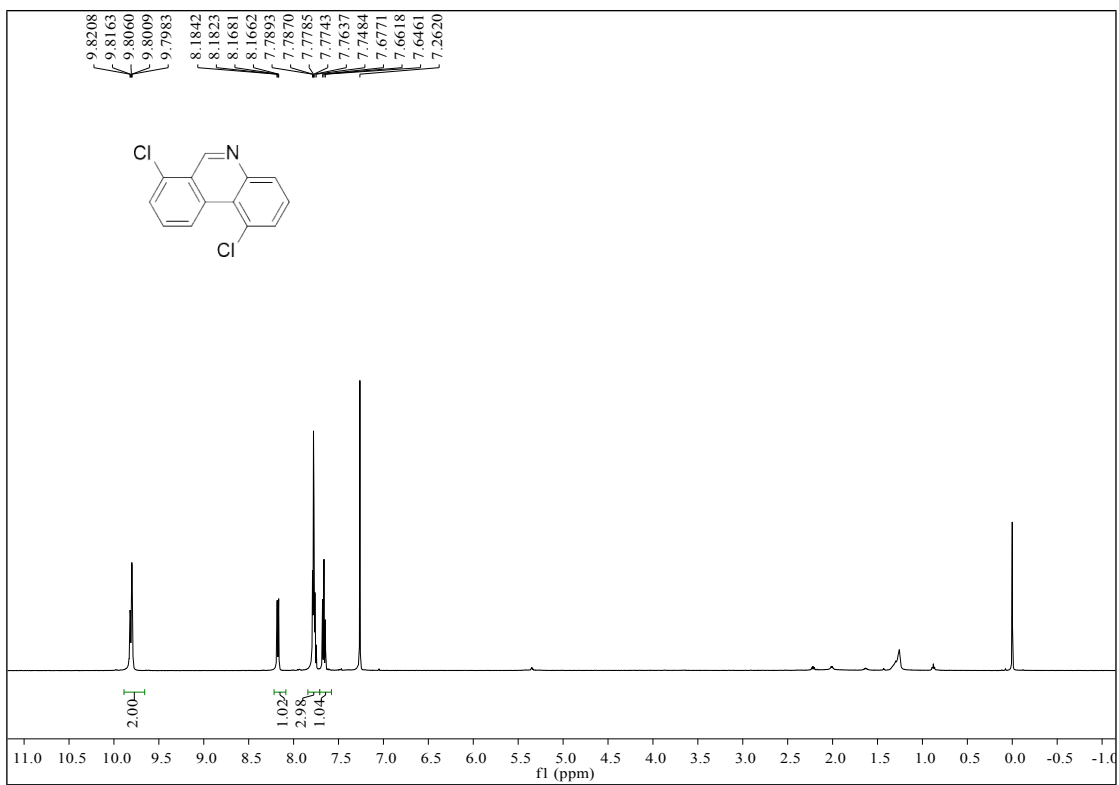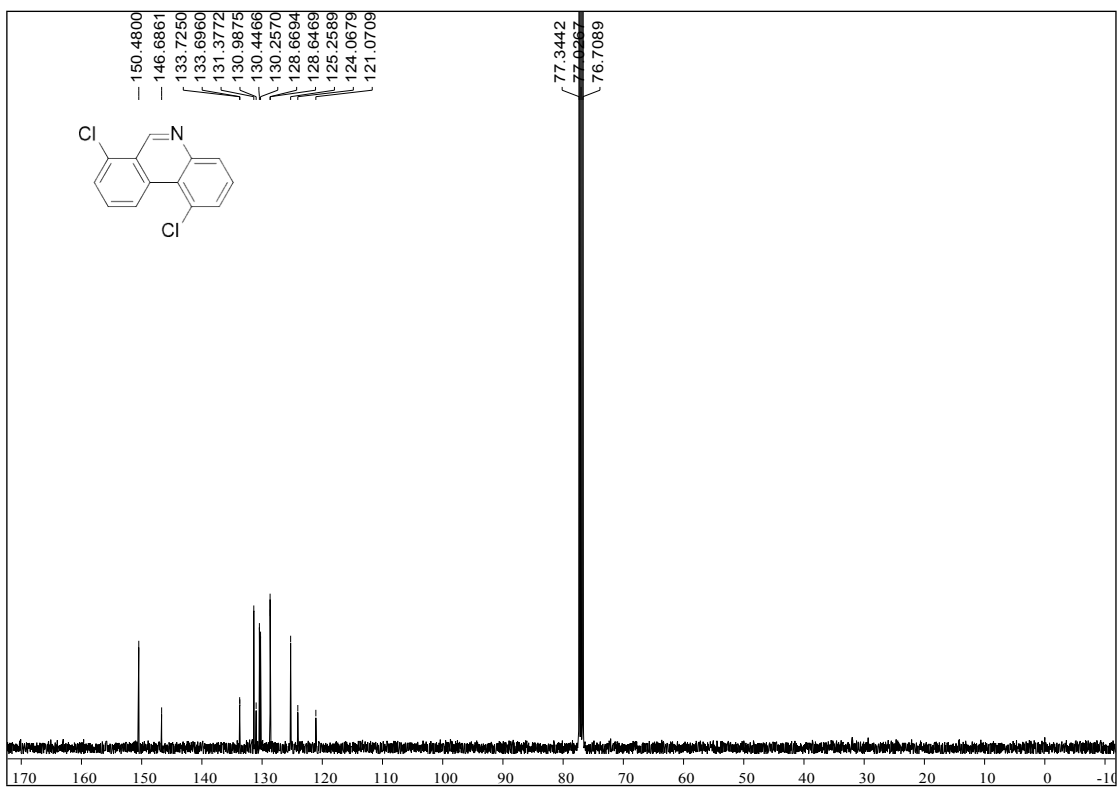

### 7-chloro-3-methylphenanthridine (3ad)

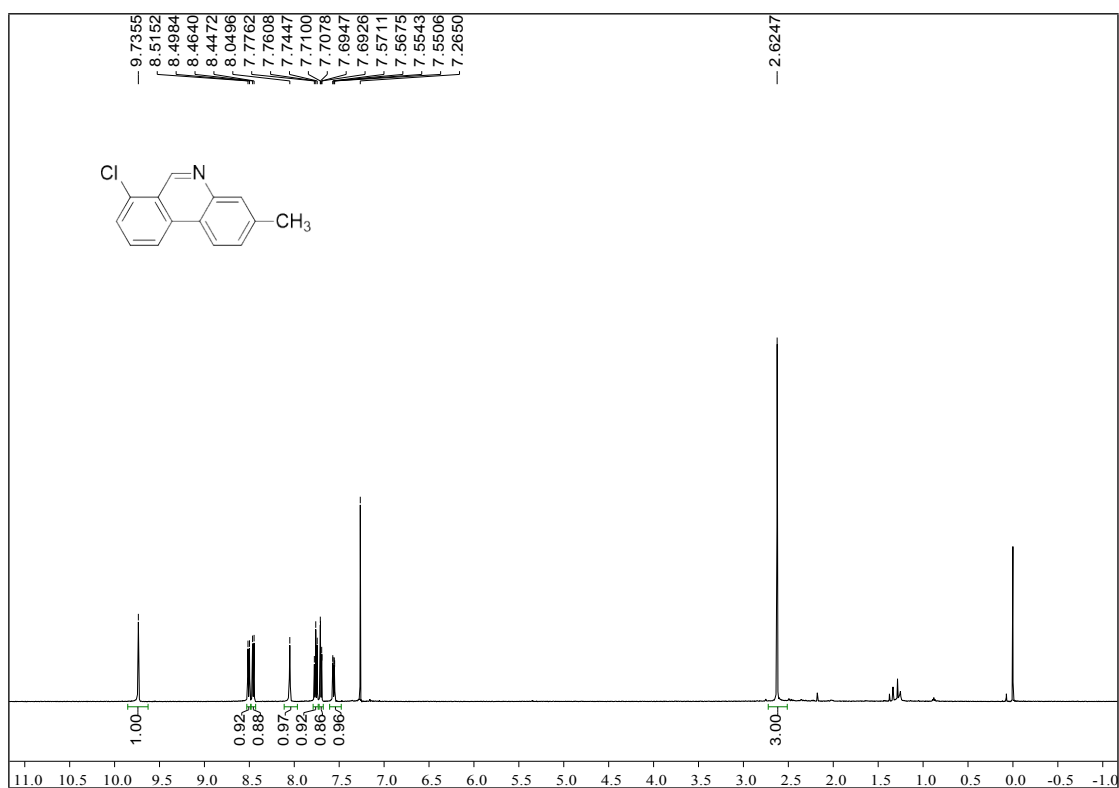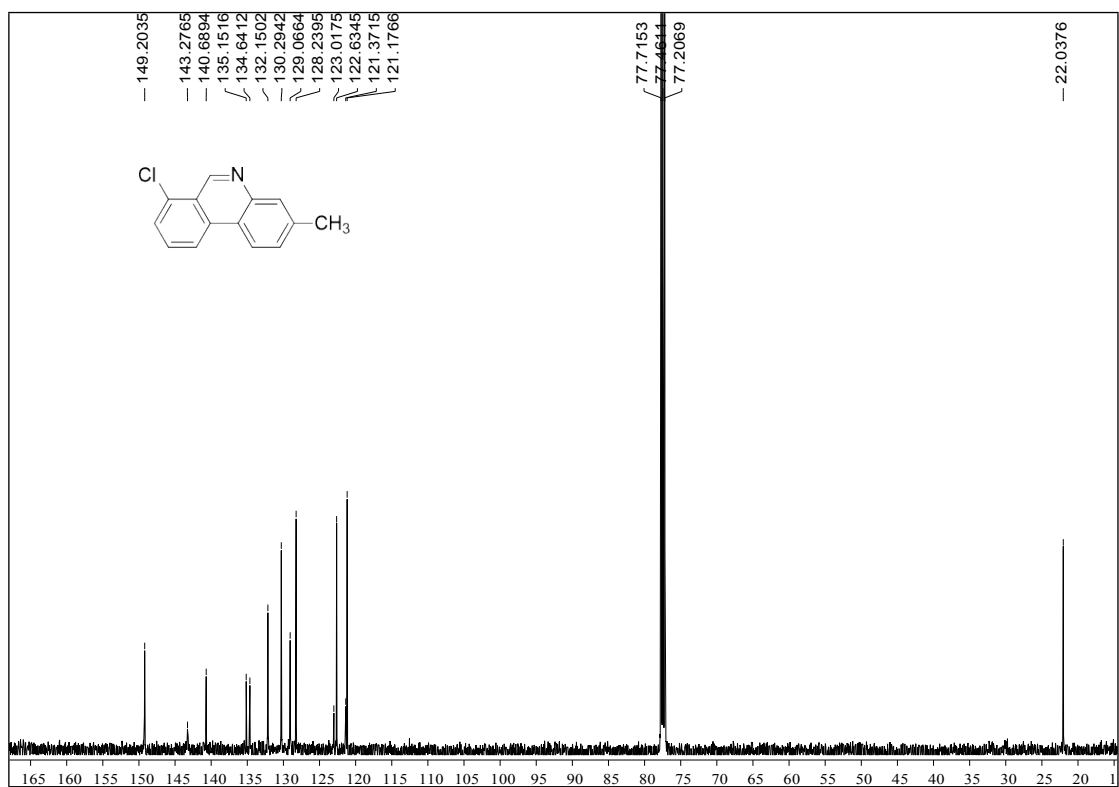

### 7-chloro-3-methoxyphenanthridine (3ae)

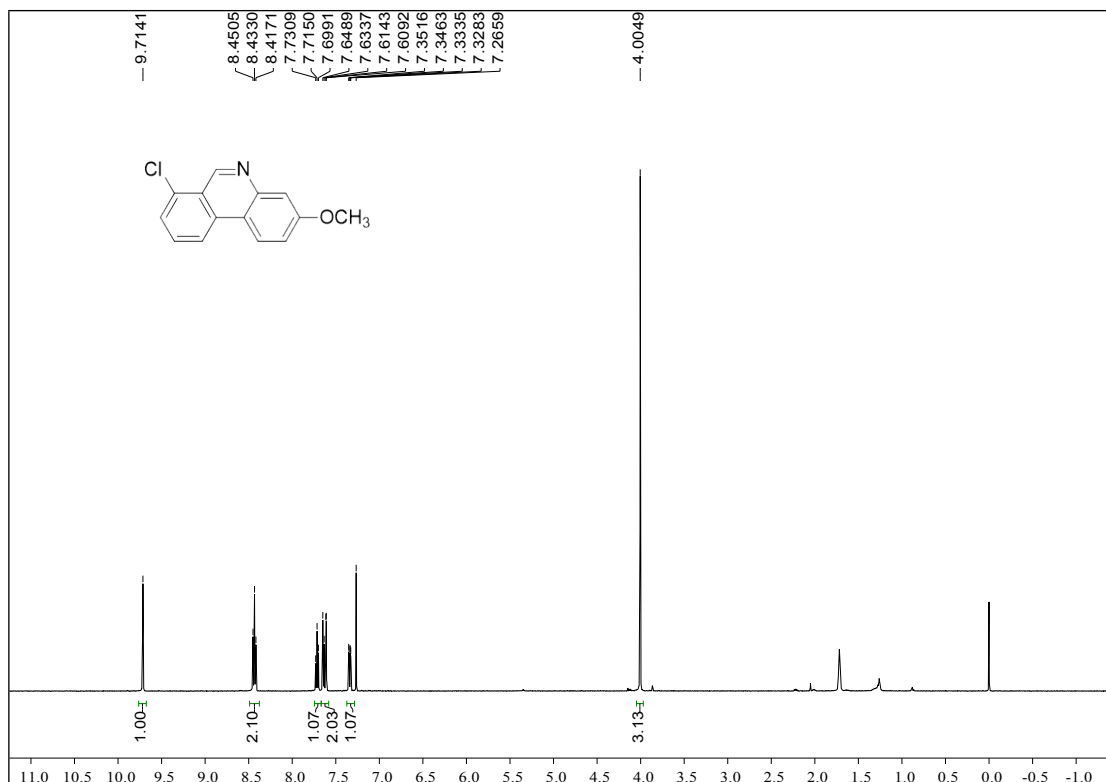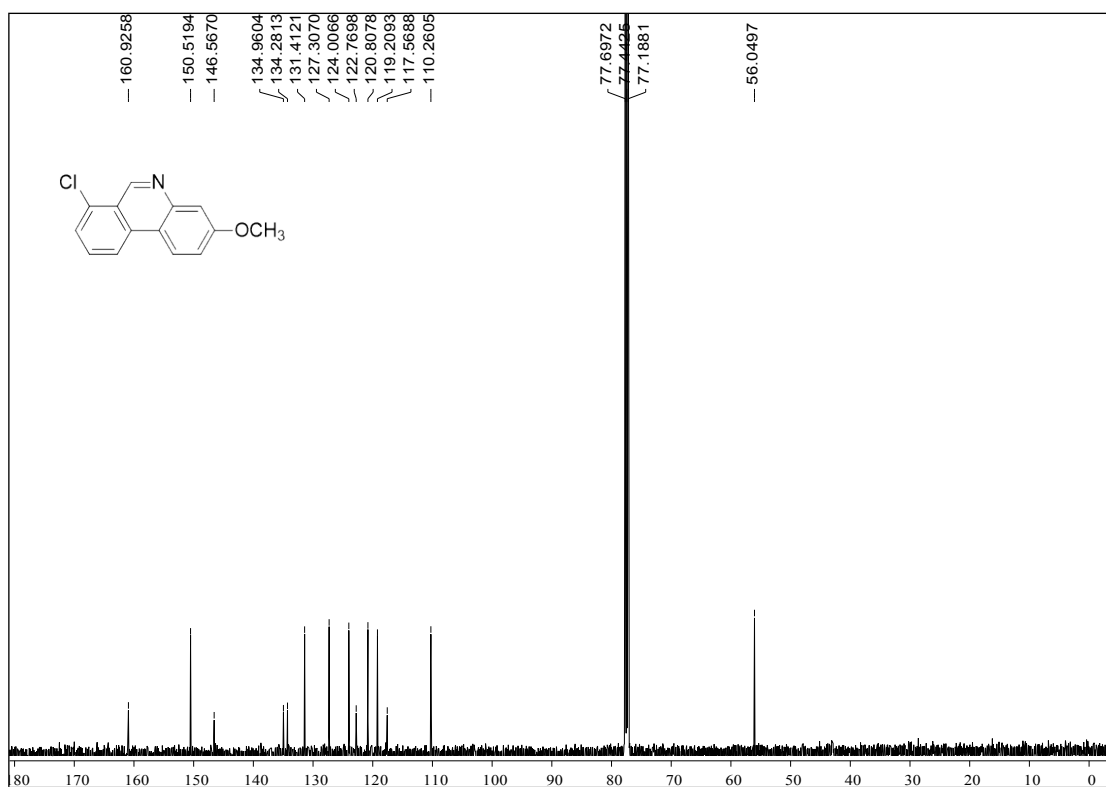

### 7-chloro-3-fluorophenanthridine (3af)

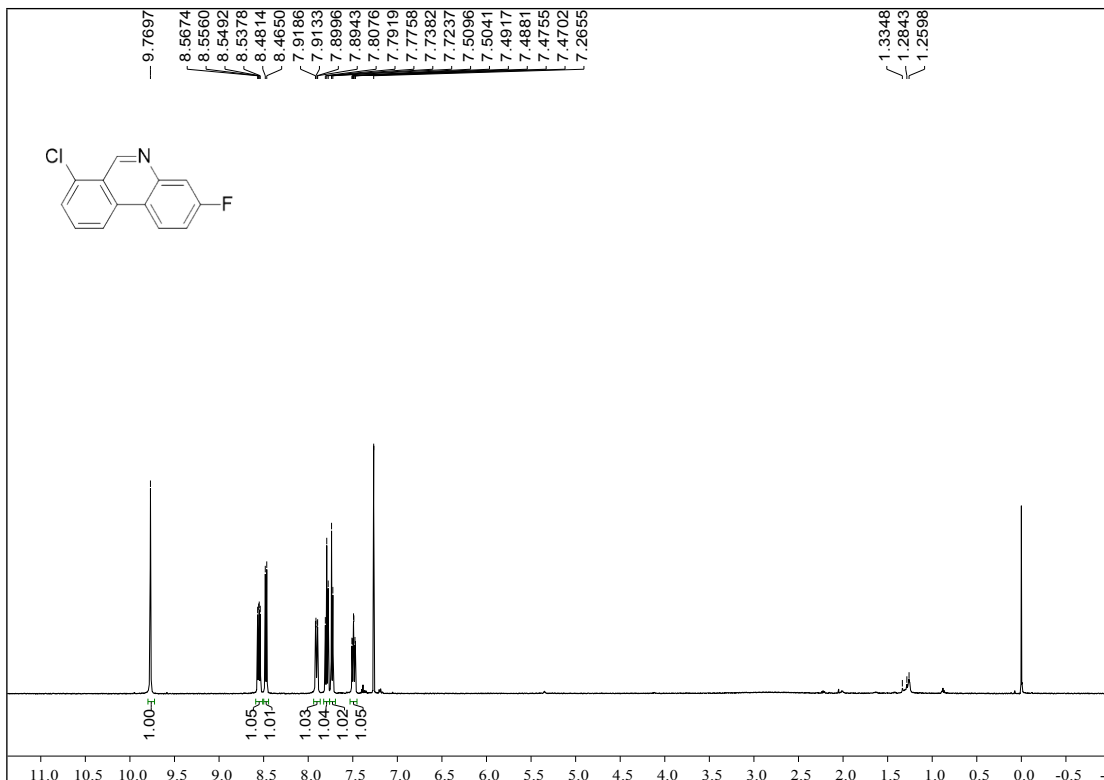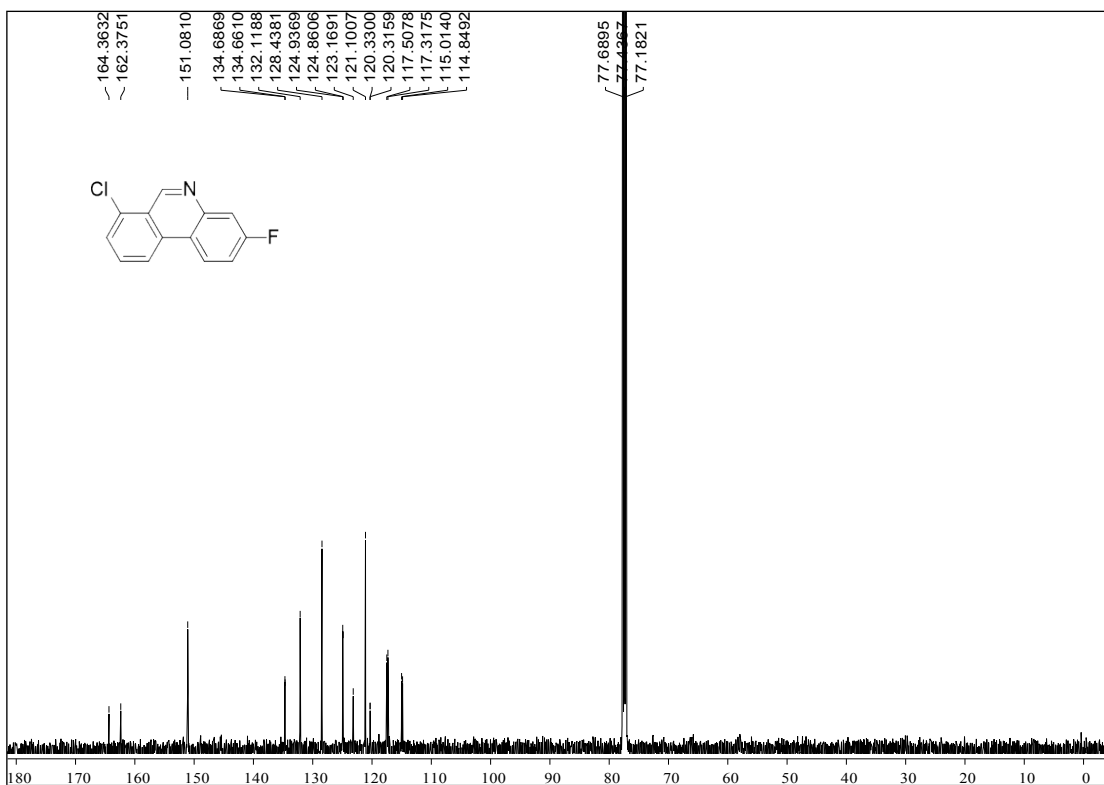

**7-chloro-3-(trifluoromethyl)phenanthridine (3ag)**

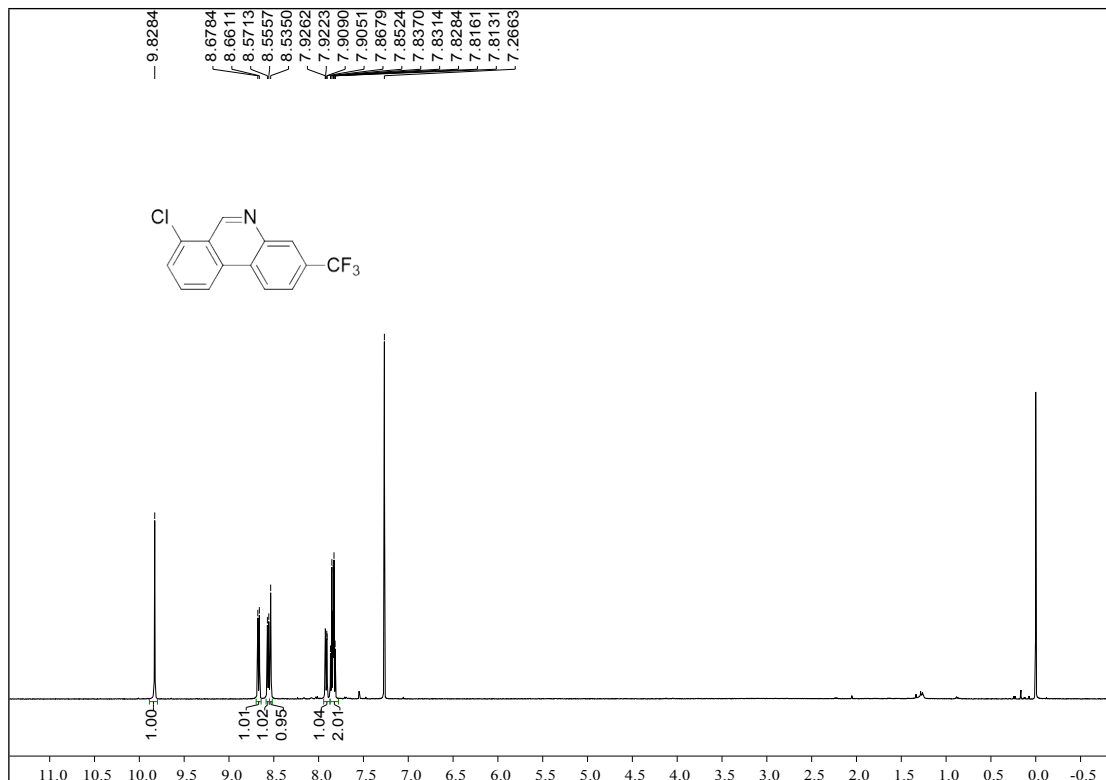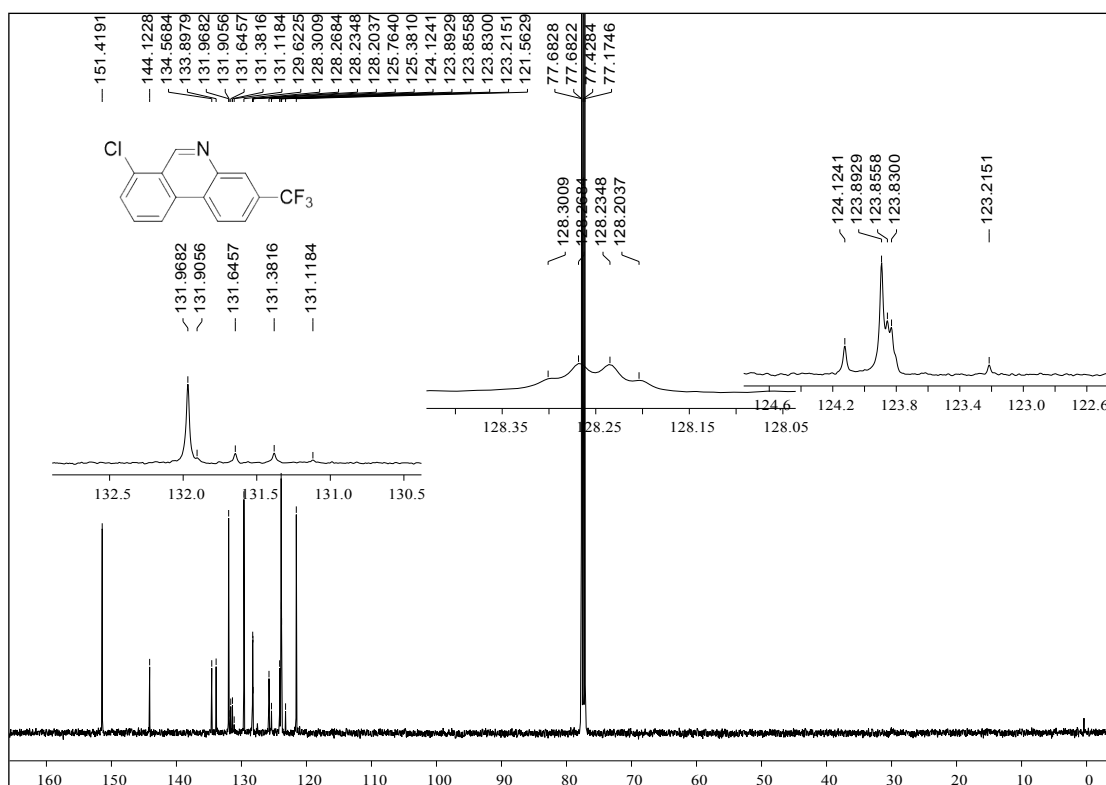

**methyl 7-chlorophenanthridine-3-carboxylate (3ah)**

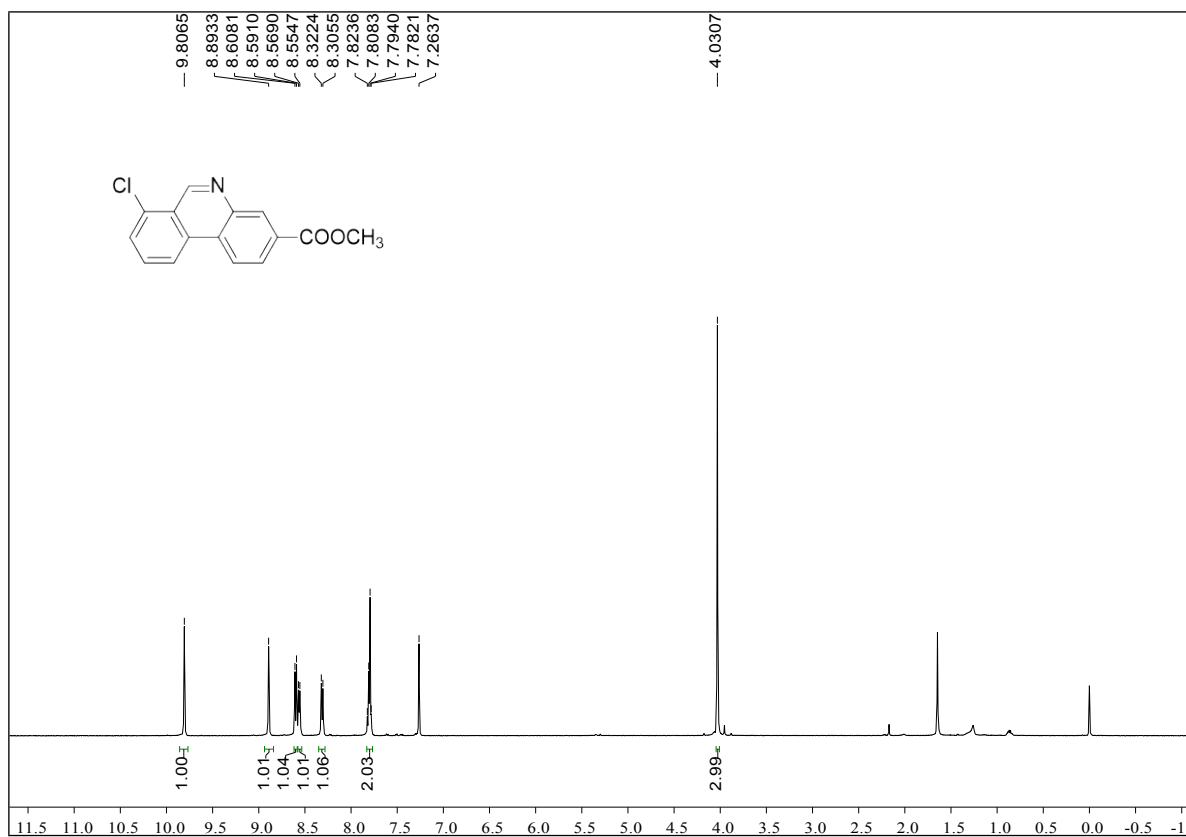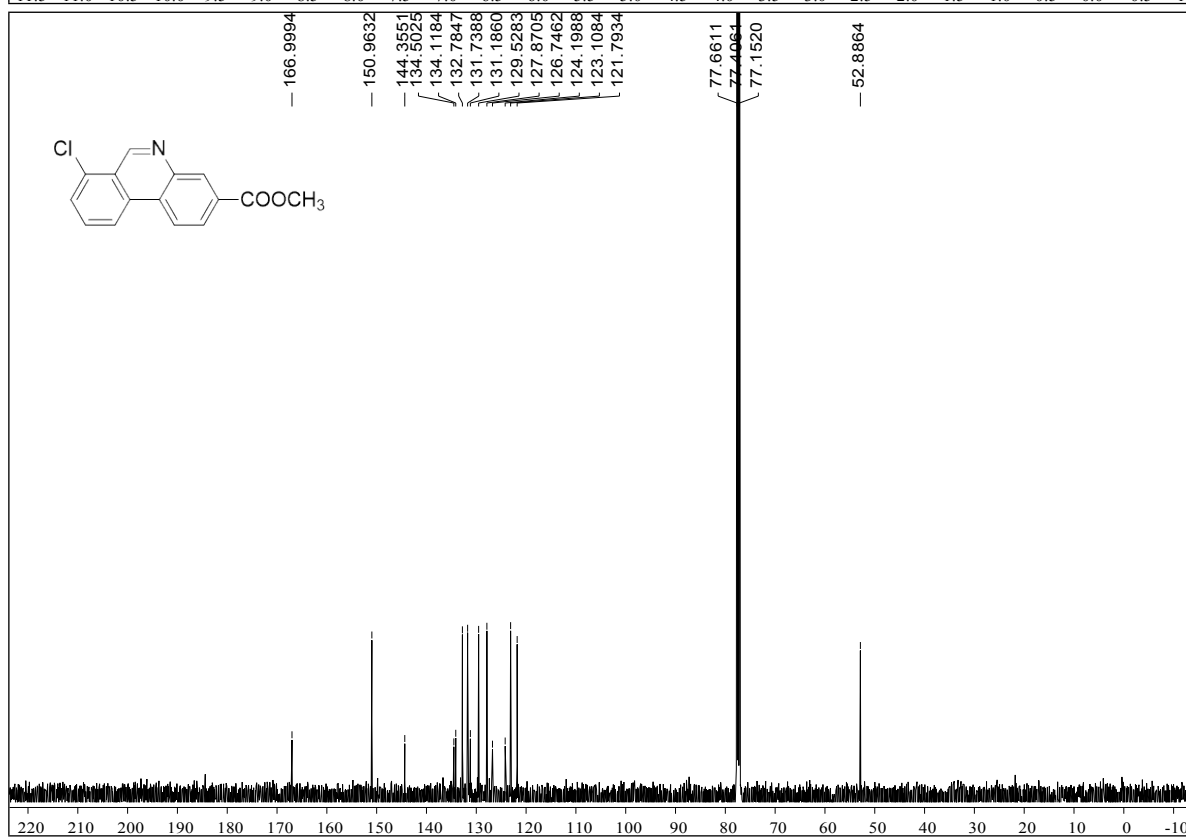

### 7-chloro-2-fluorophenanthridine (3ai)

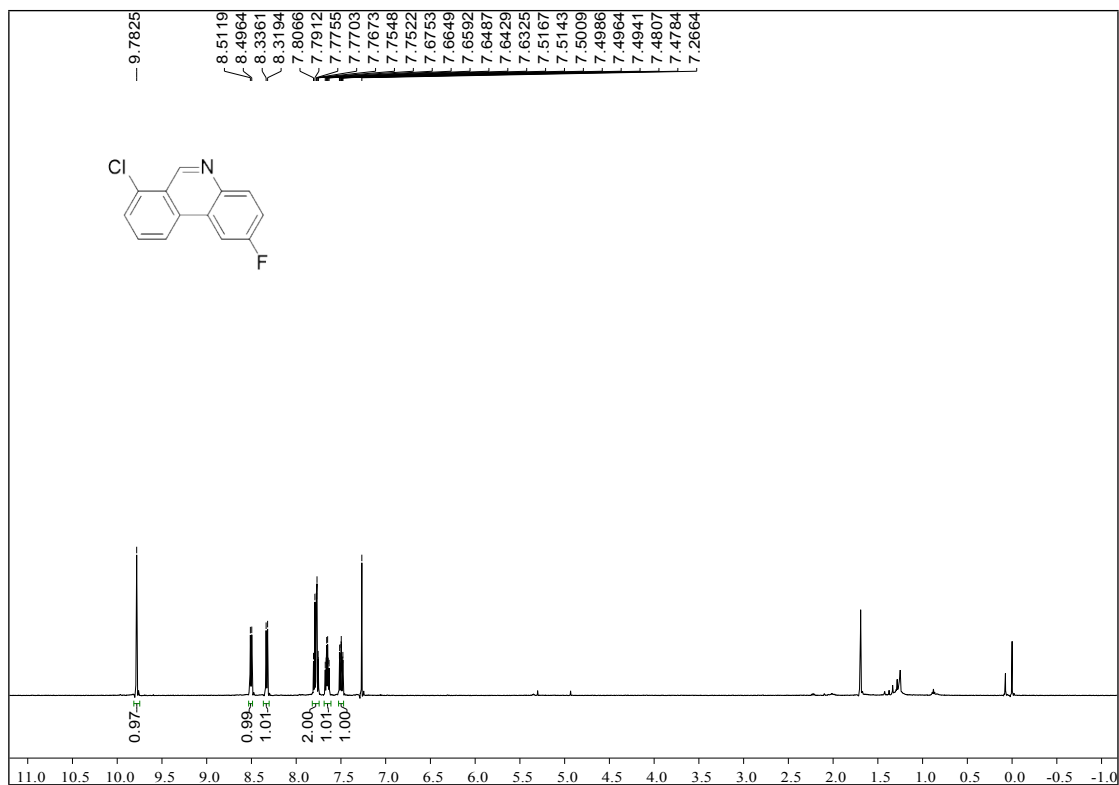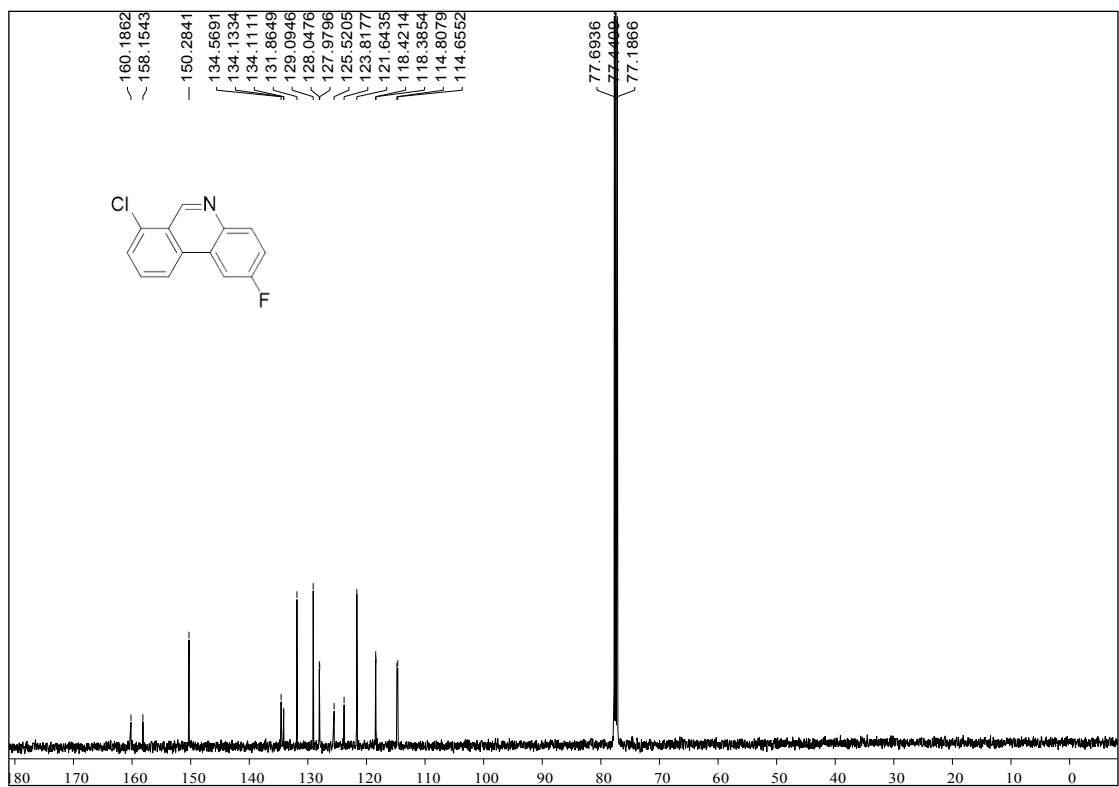

## 2,7-dichlorophenanthridine (3aj)

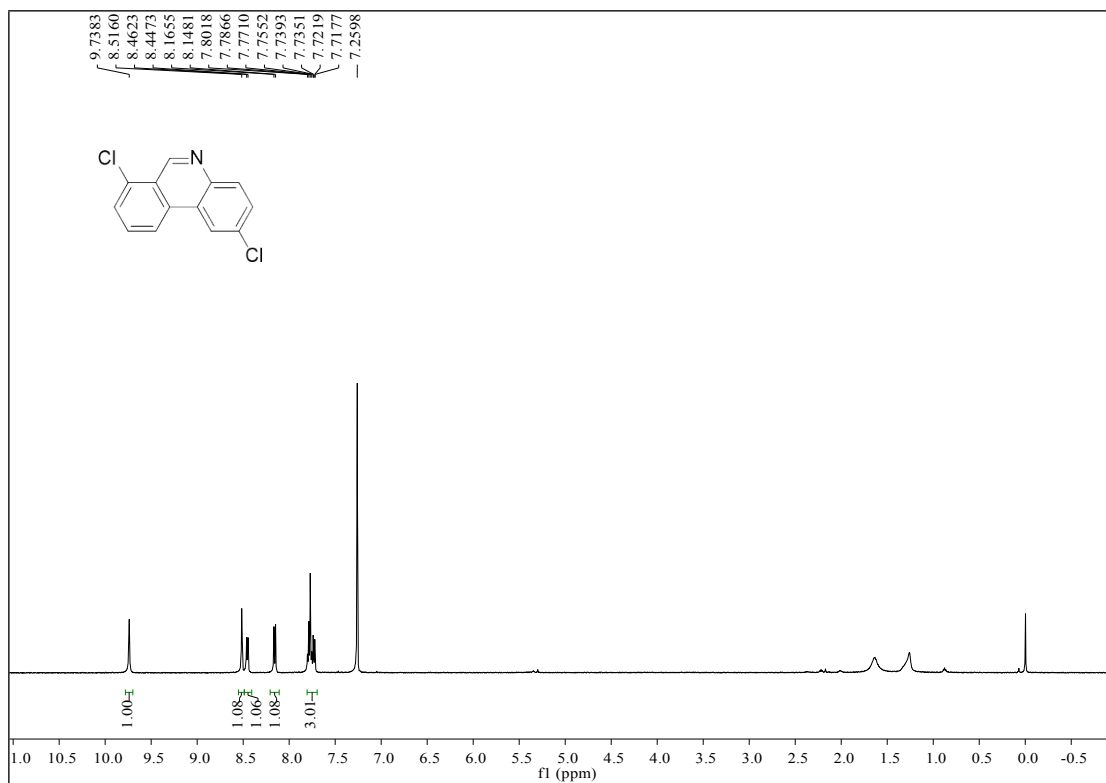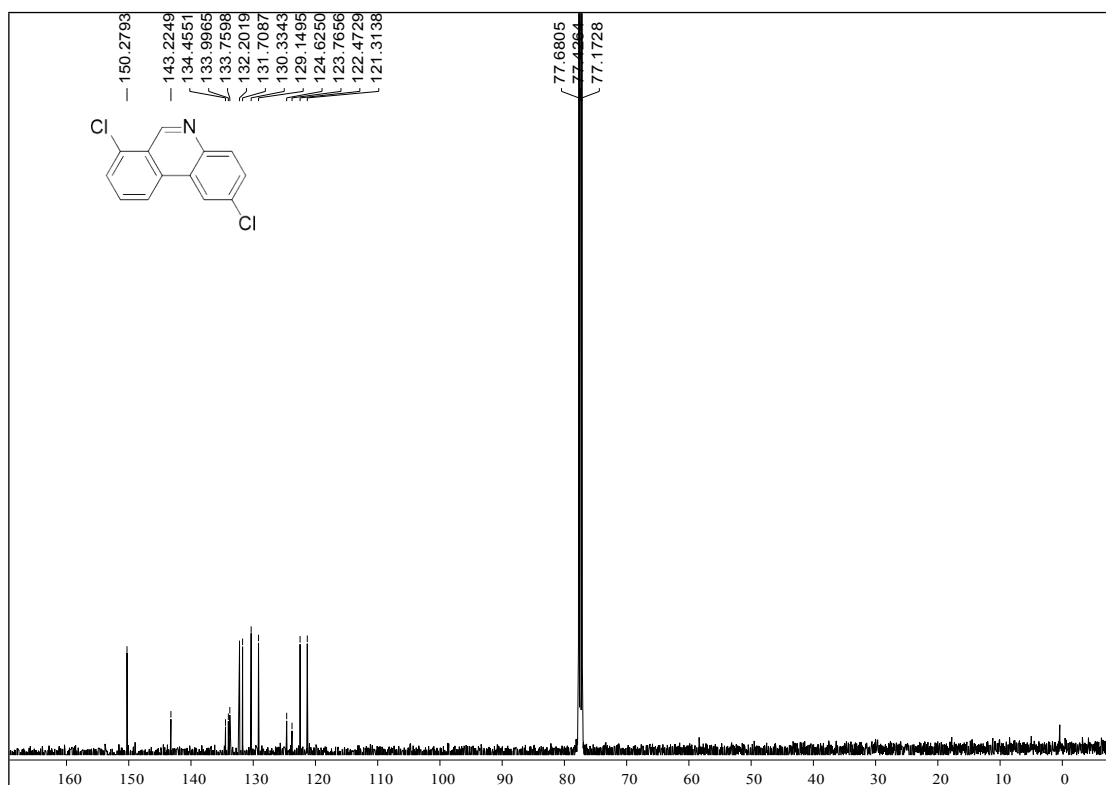



### 7-chloro-2-(trifluoromethyl)phenanthridine (3ak)

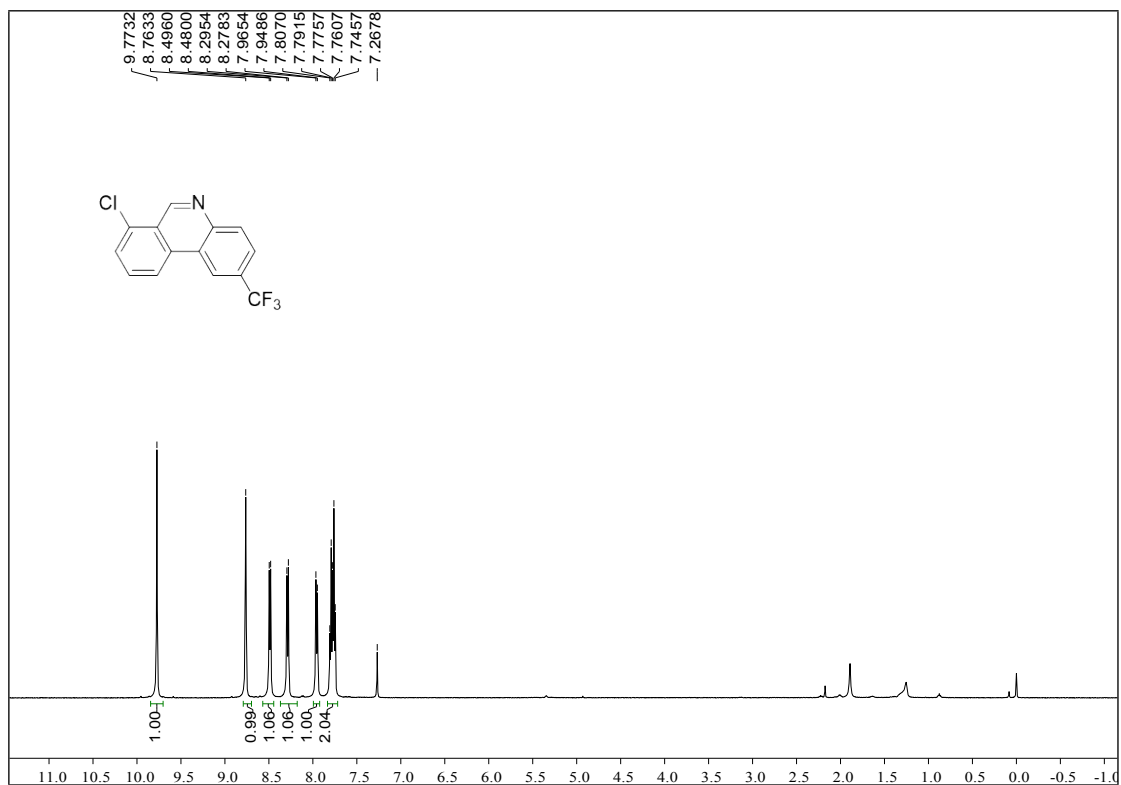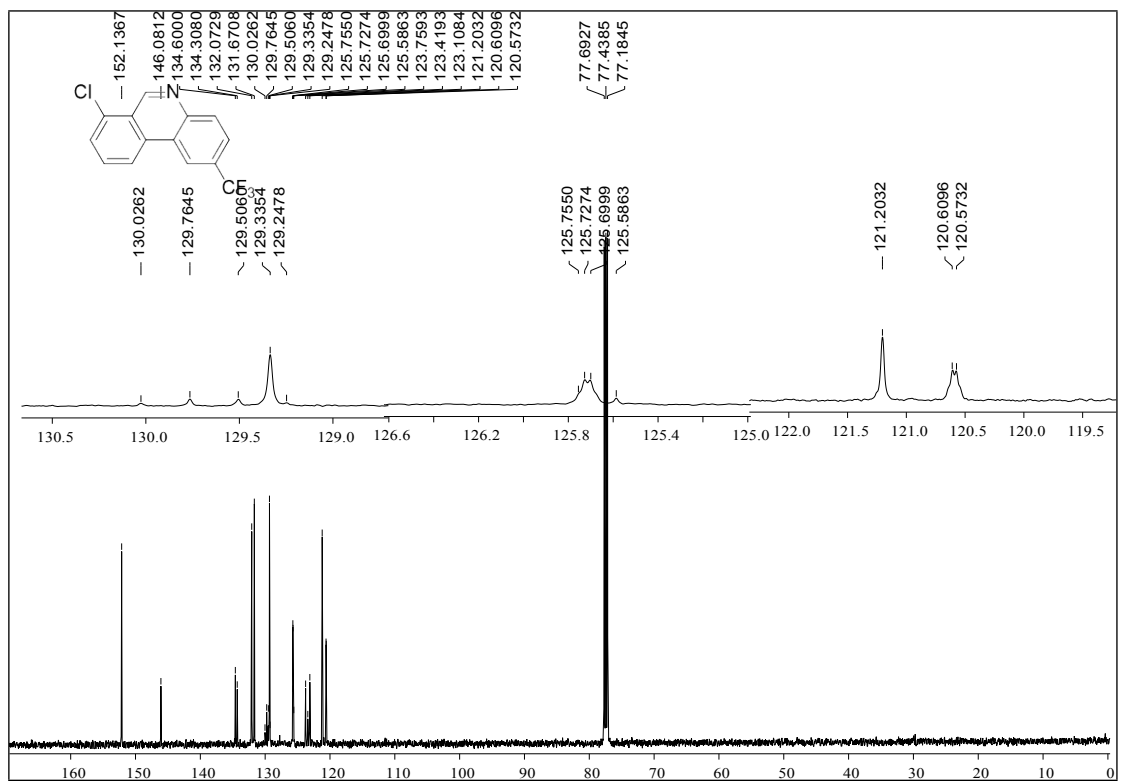

### 7-chloro-2-methylphenanthridine (3a)

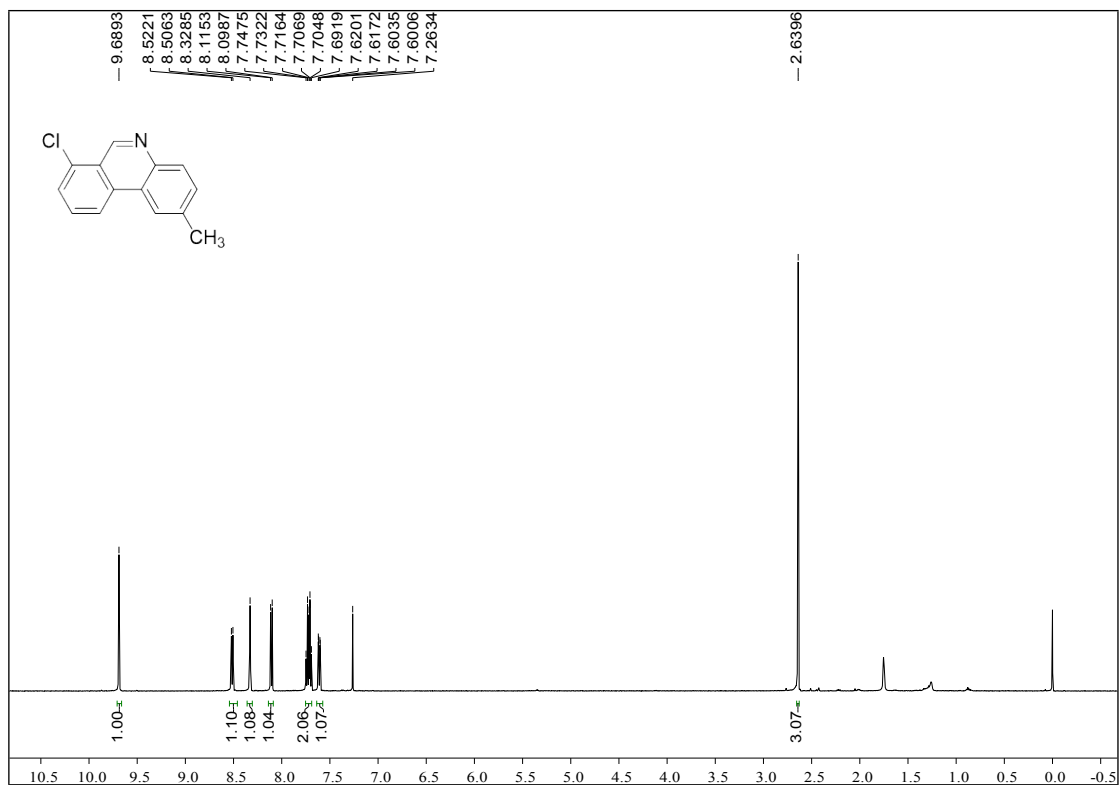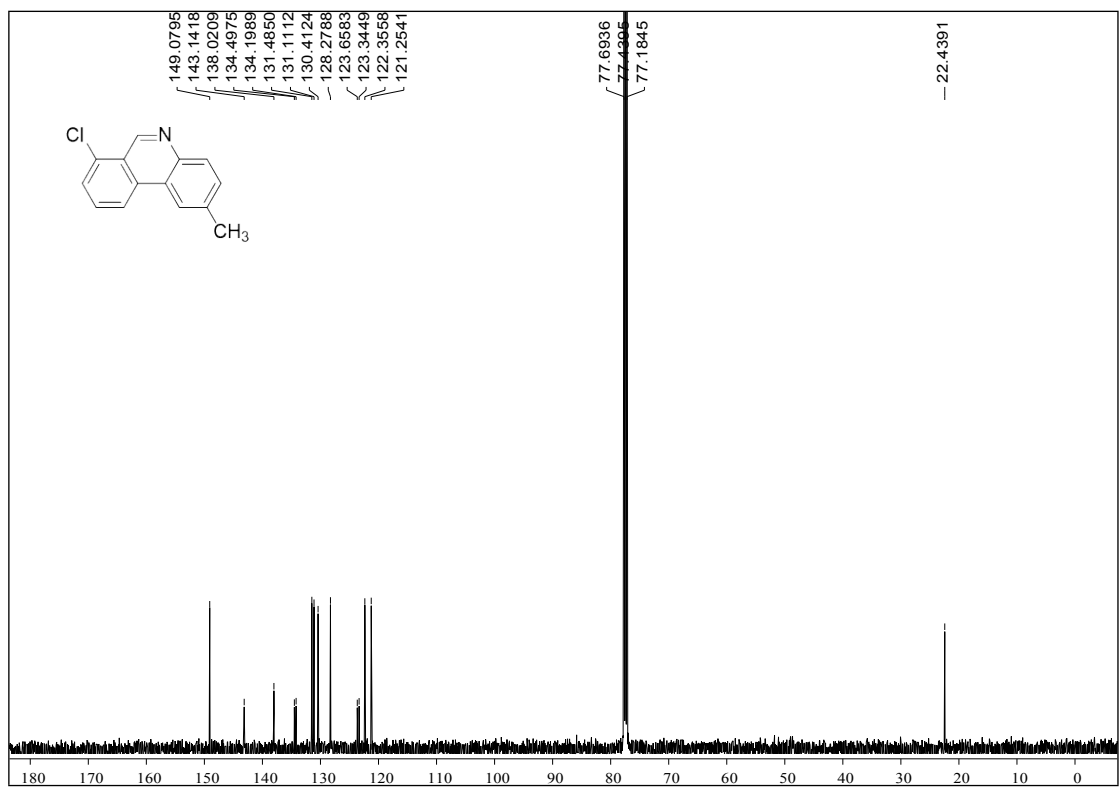

### 7-chloro-4-fluorophenanthridine (3ai')

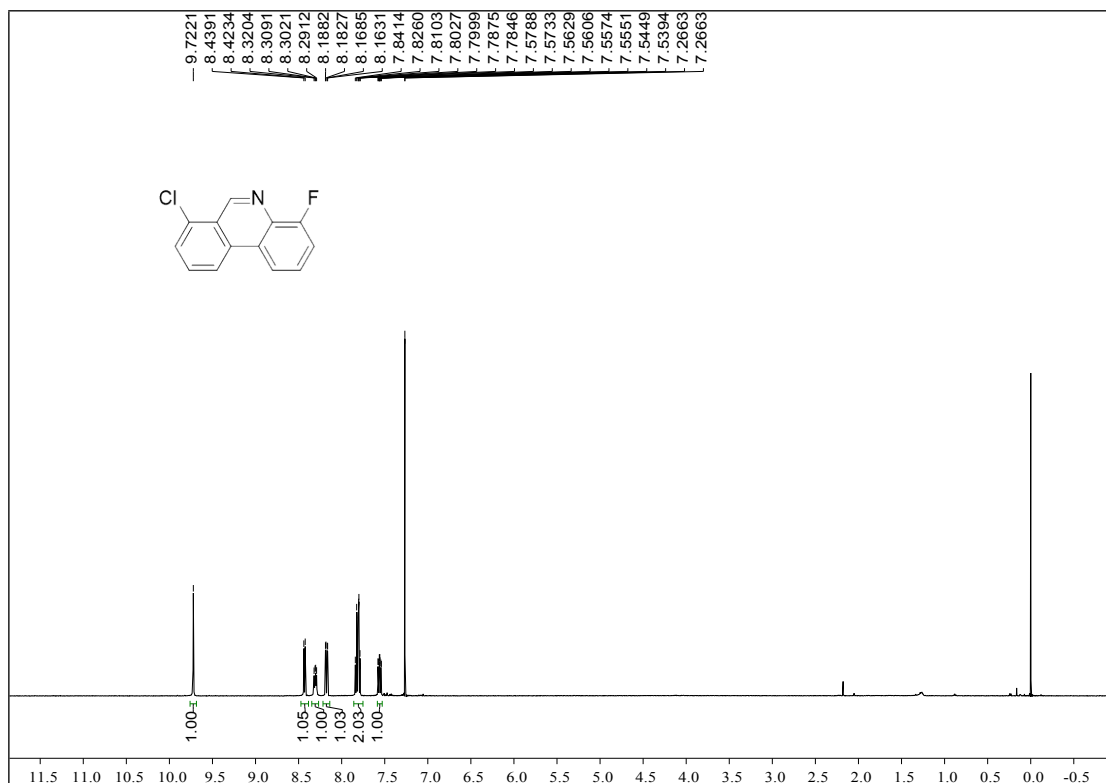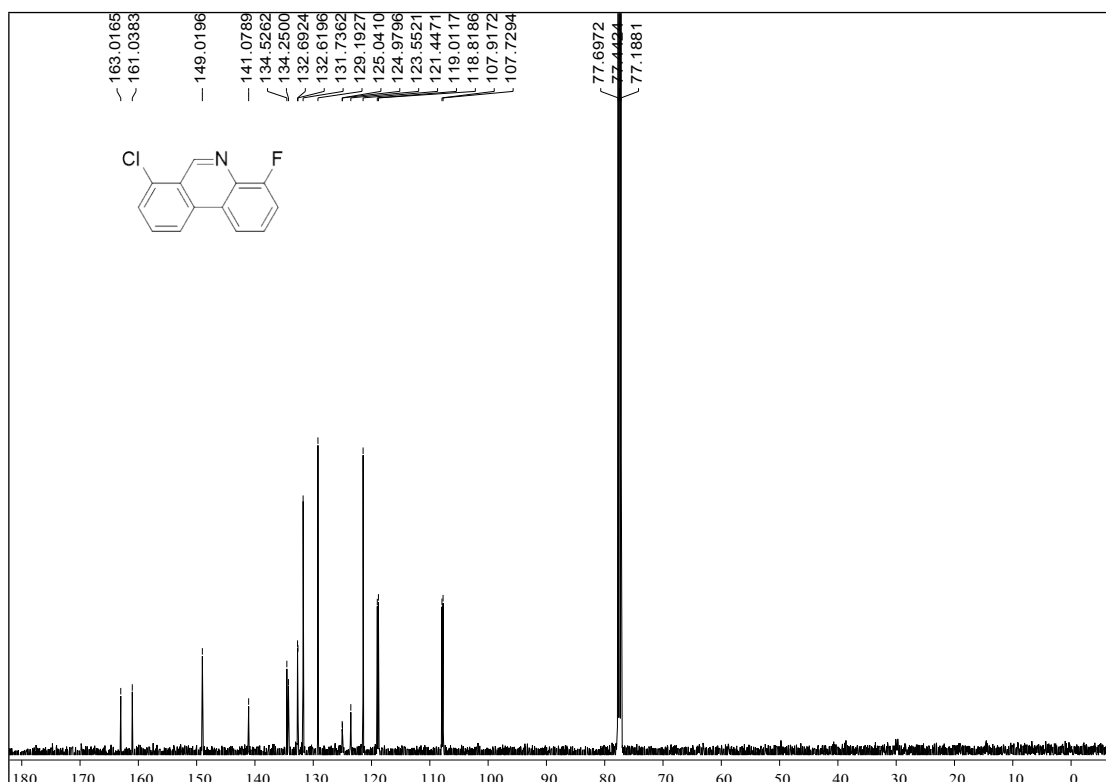

### 4,7-dichlorophenanthridine (3aj')

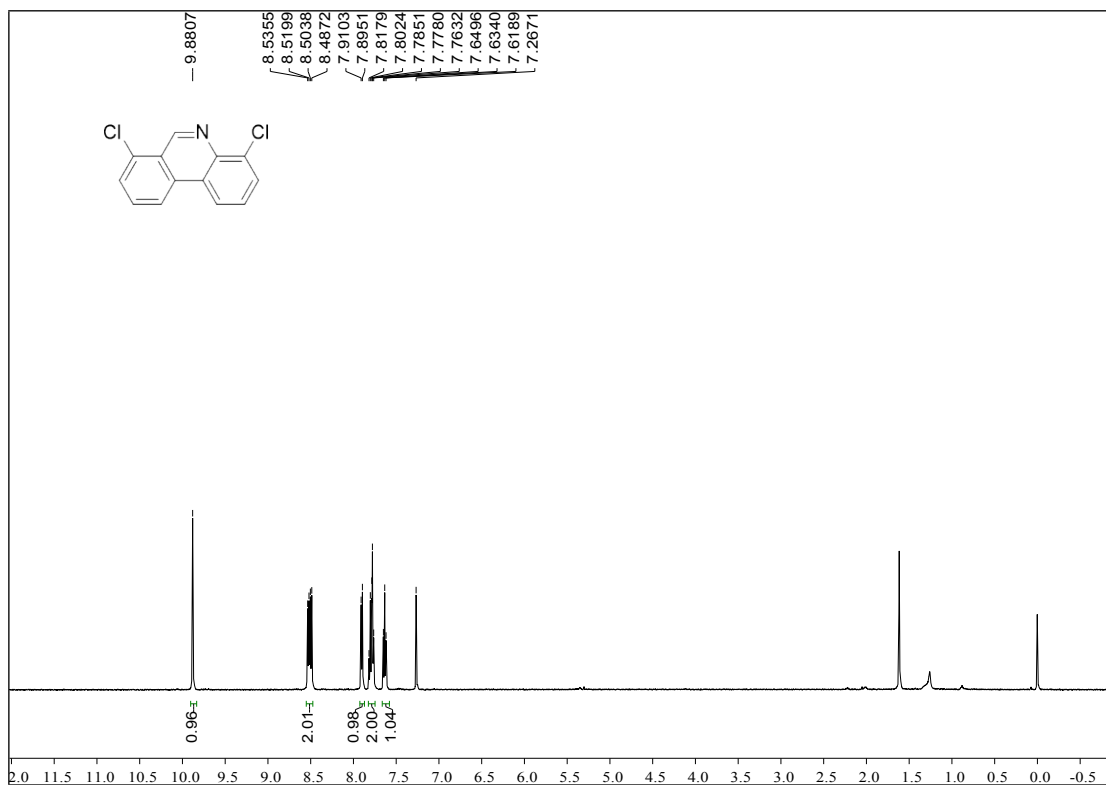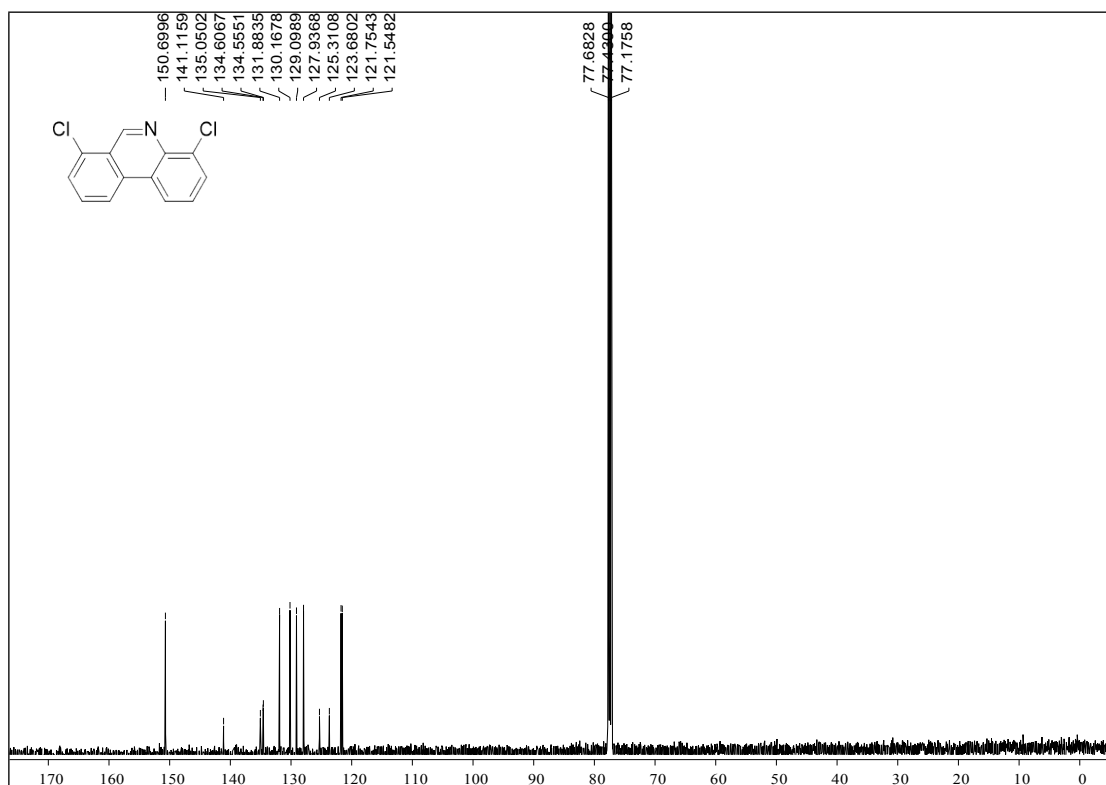

### 2,4,7-trichlorophenanthridine (3am)

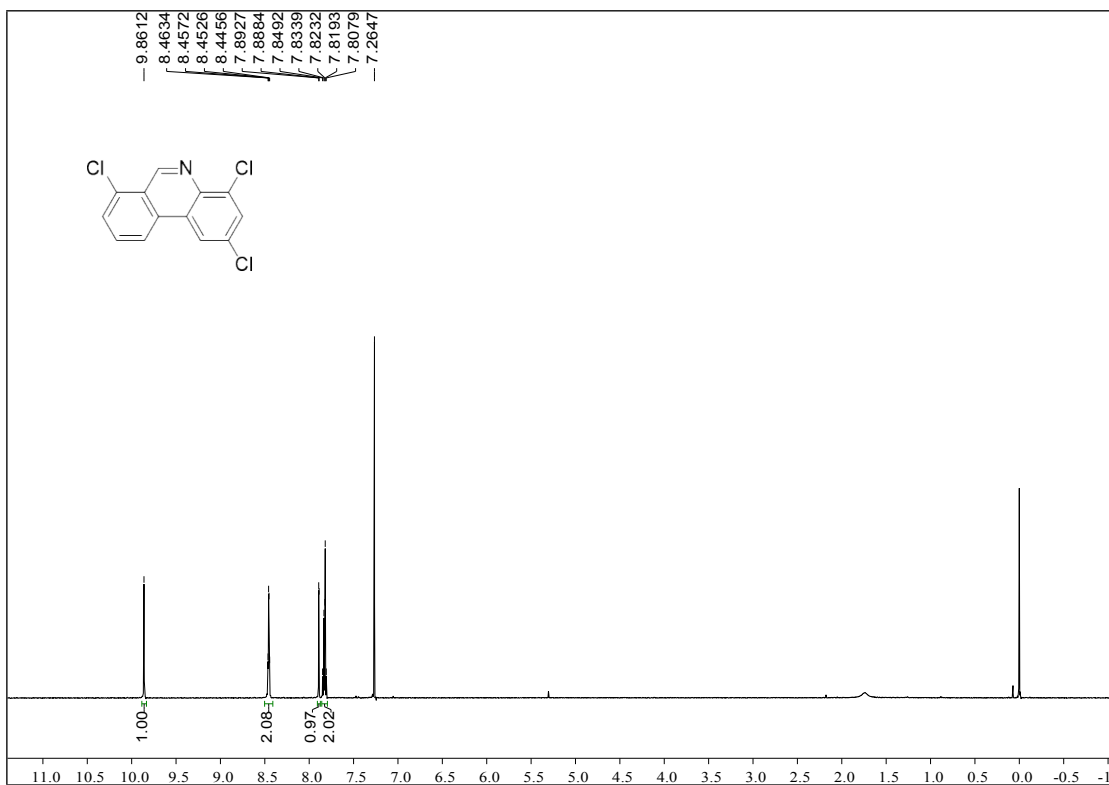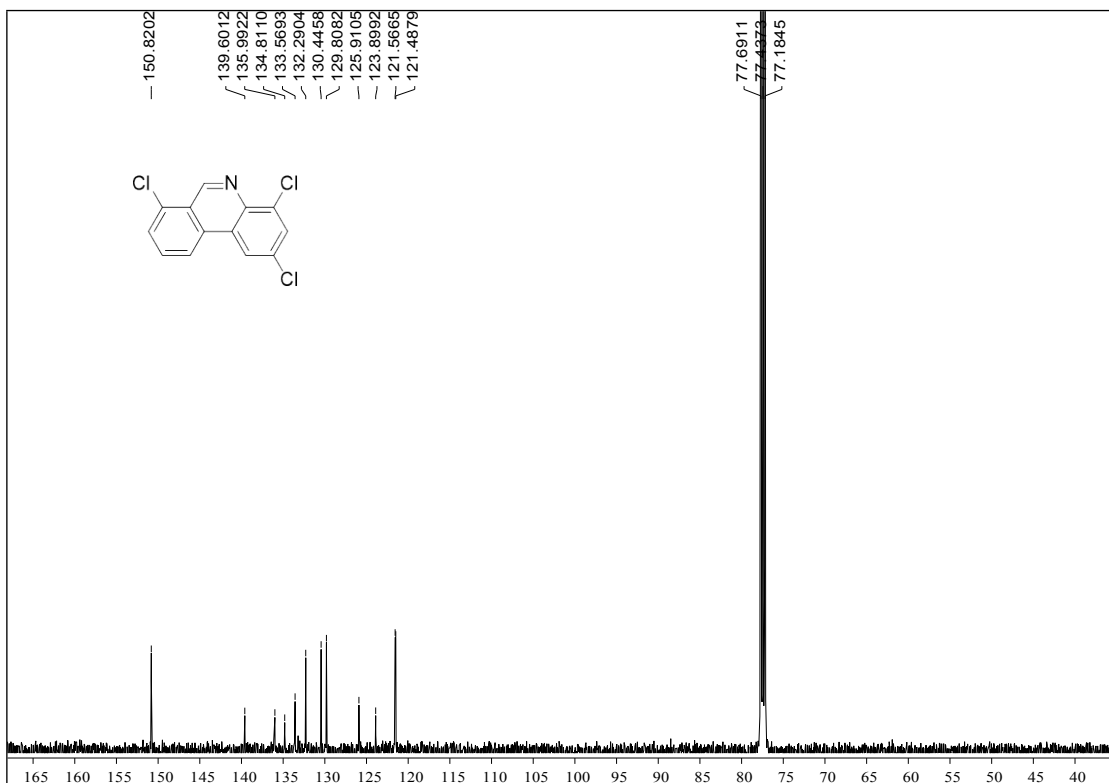

### 7-chloro-2,4-dimethylphenanthridine (3an)

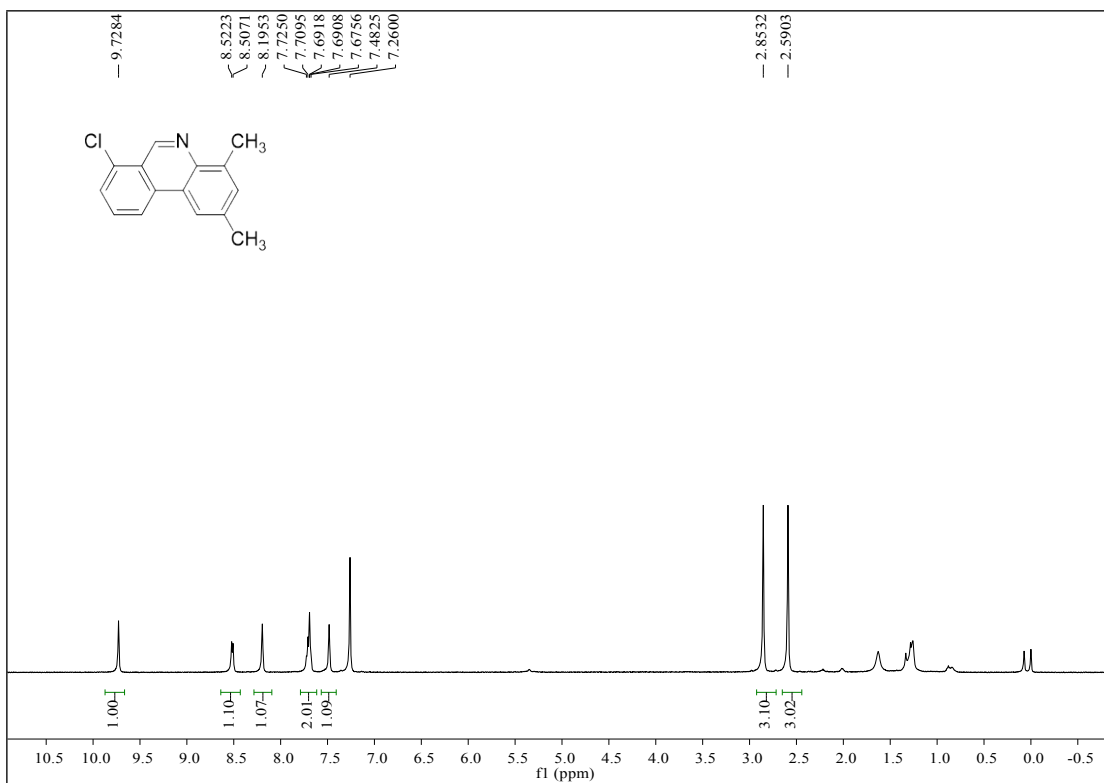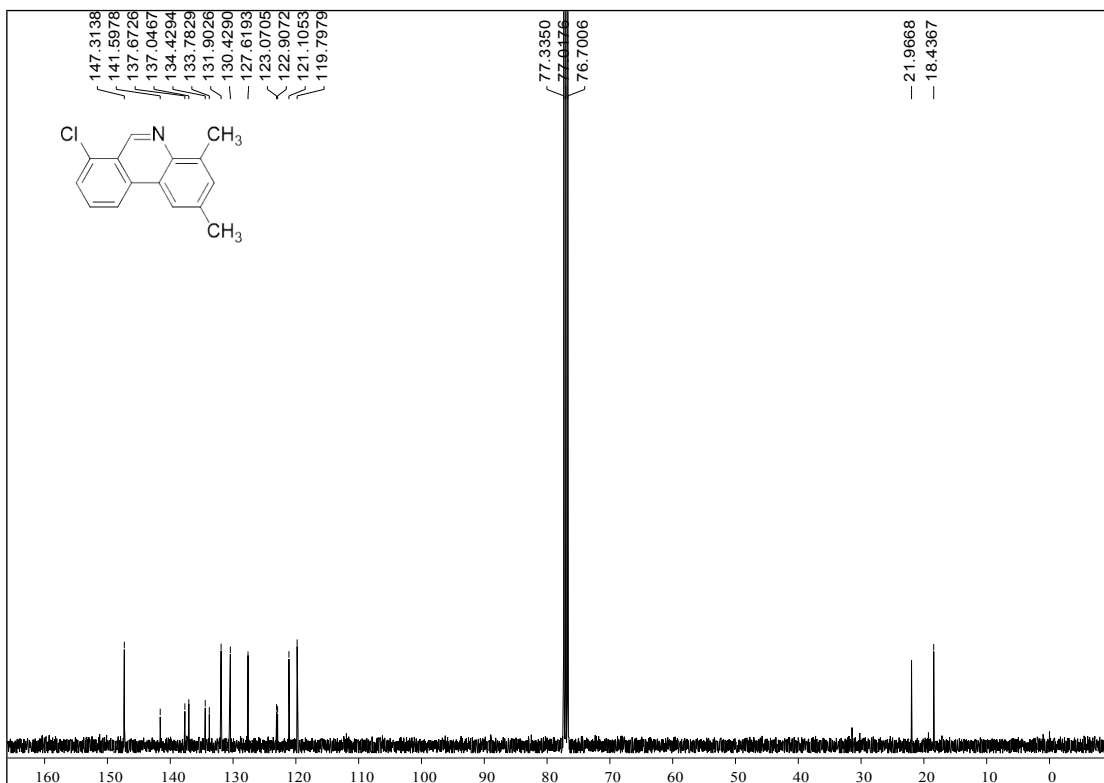

### 2,3,7-trichlorophenanthridine (3ao)

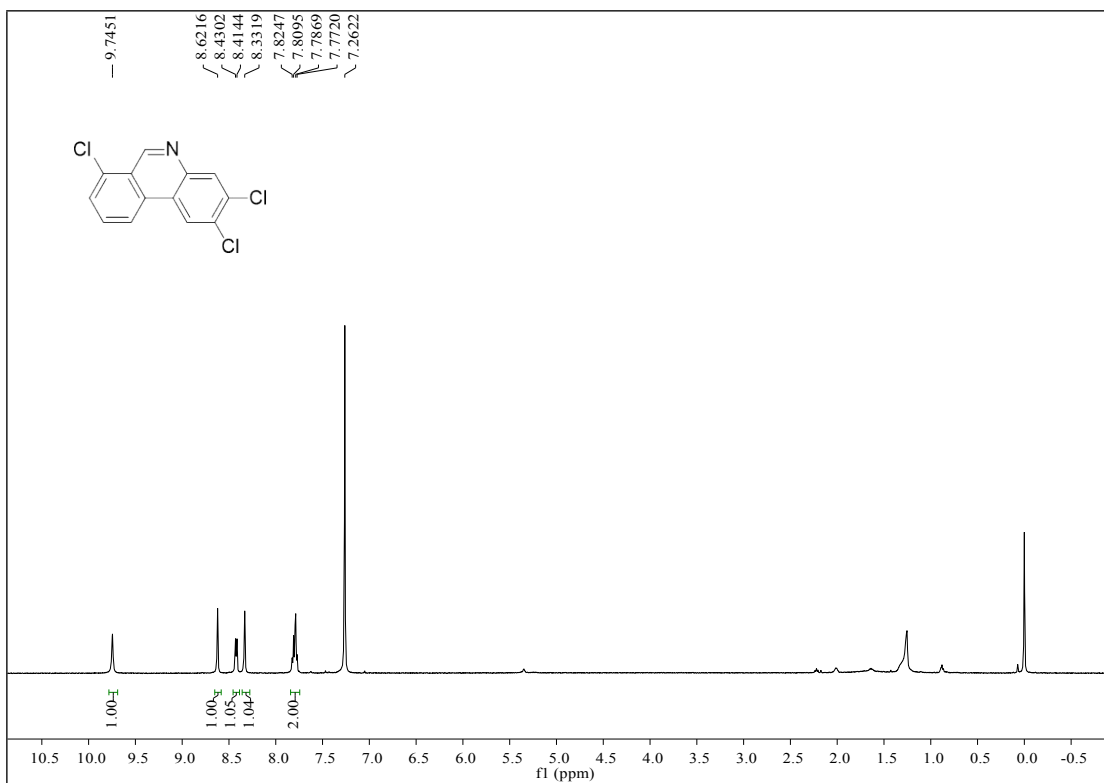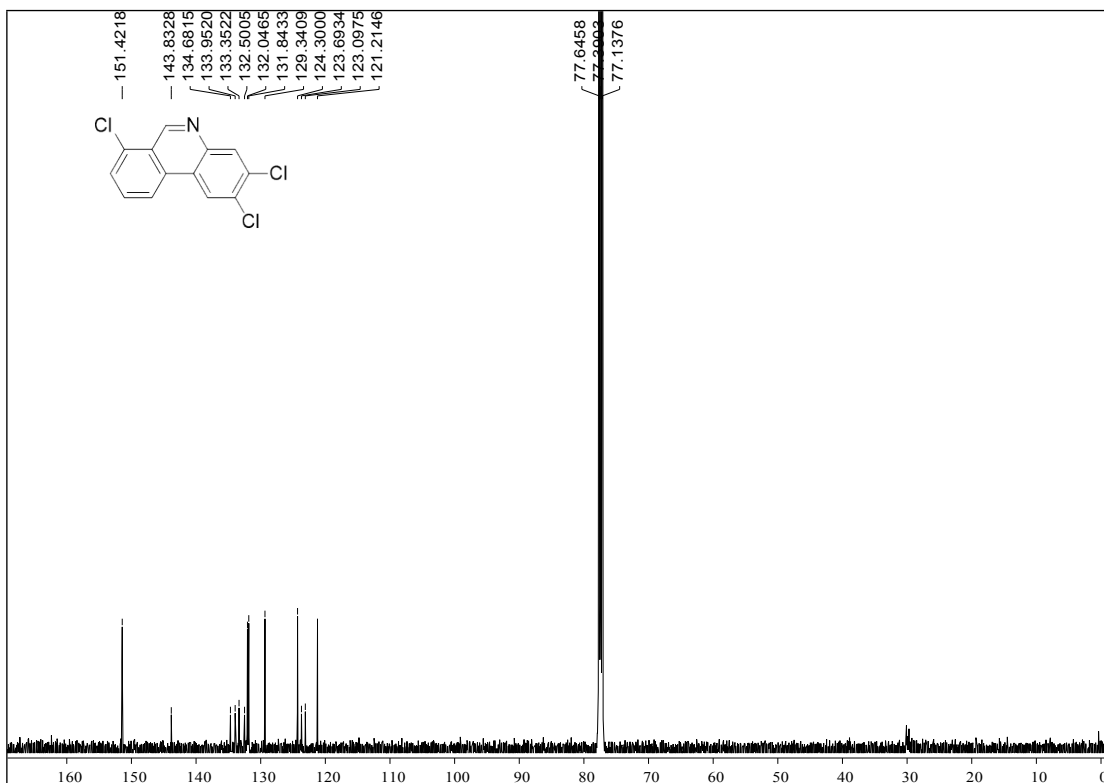

### 7-chloro-2,3-dimethylphenanthridine (3ap)

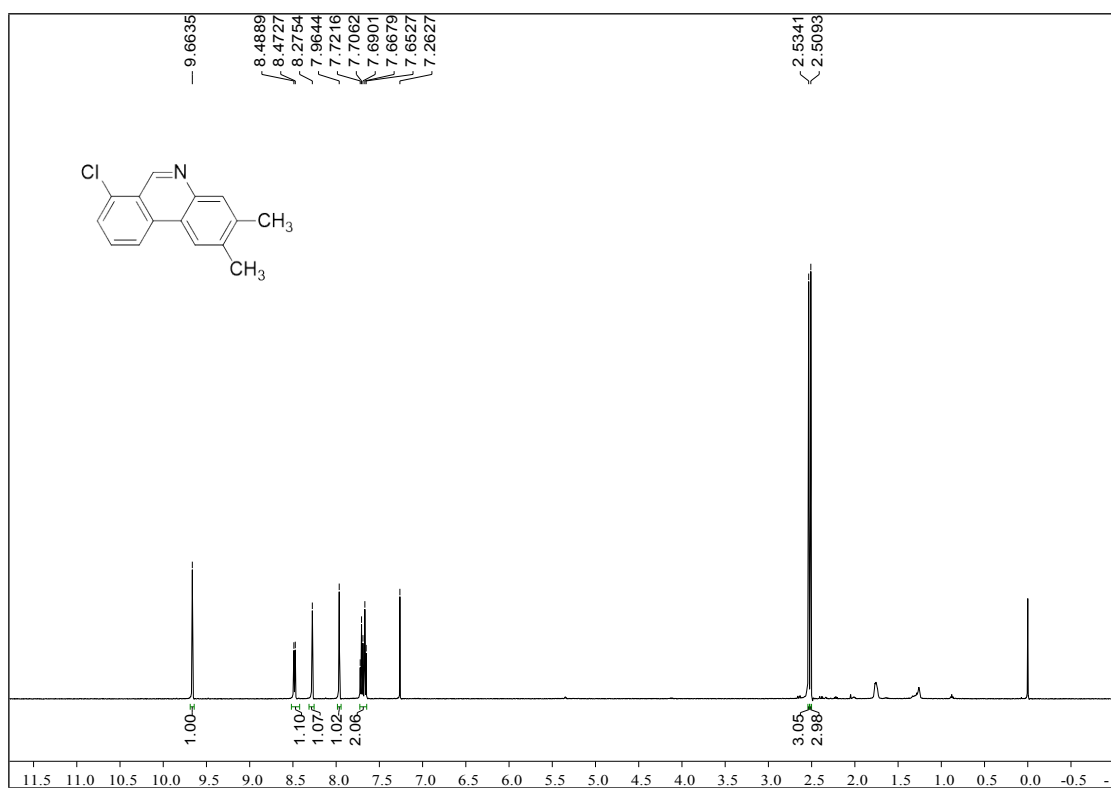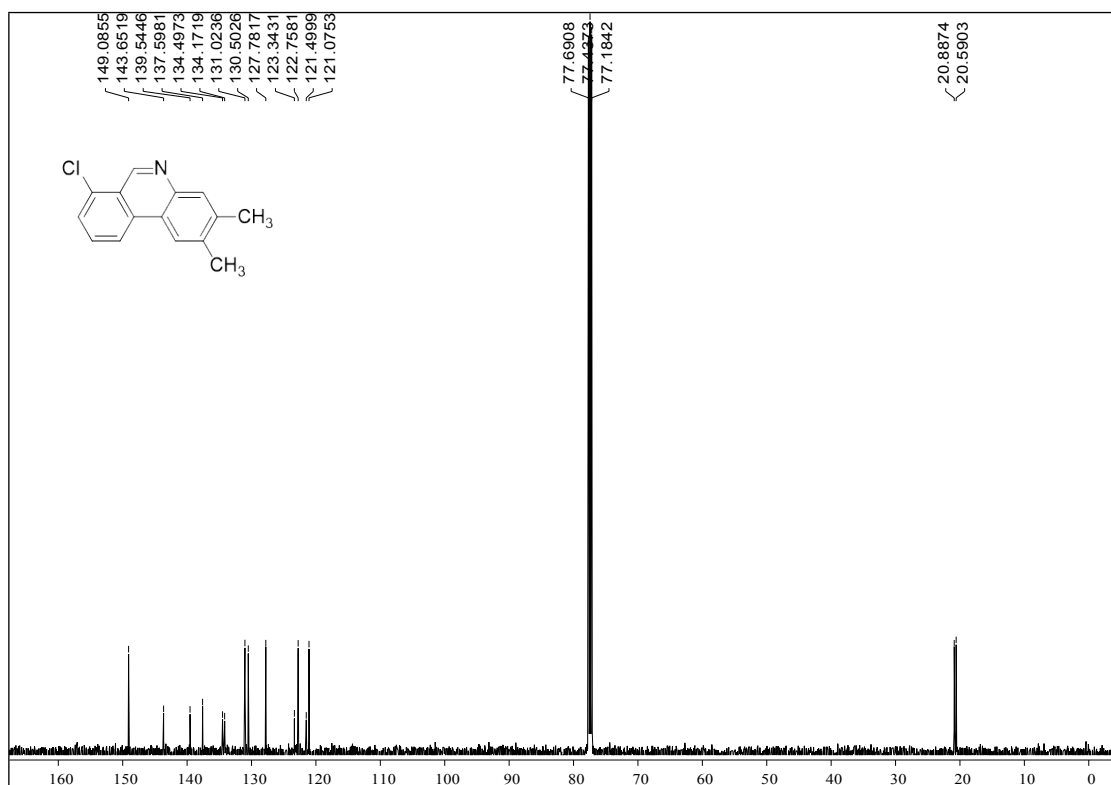



### 4-chlorobenzo[a]phenanthridine (3aq)

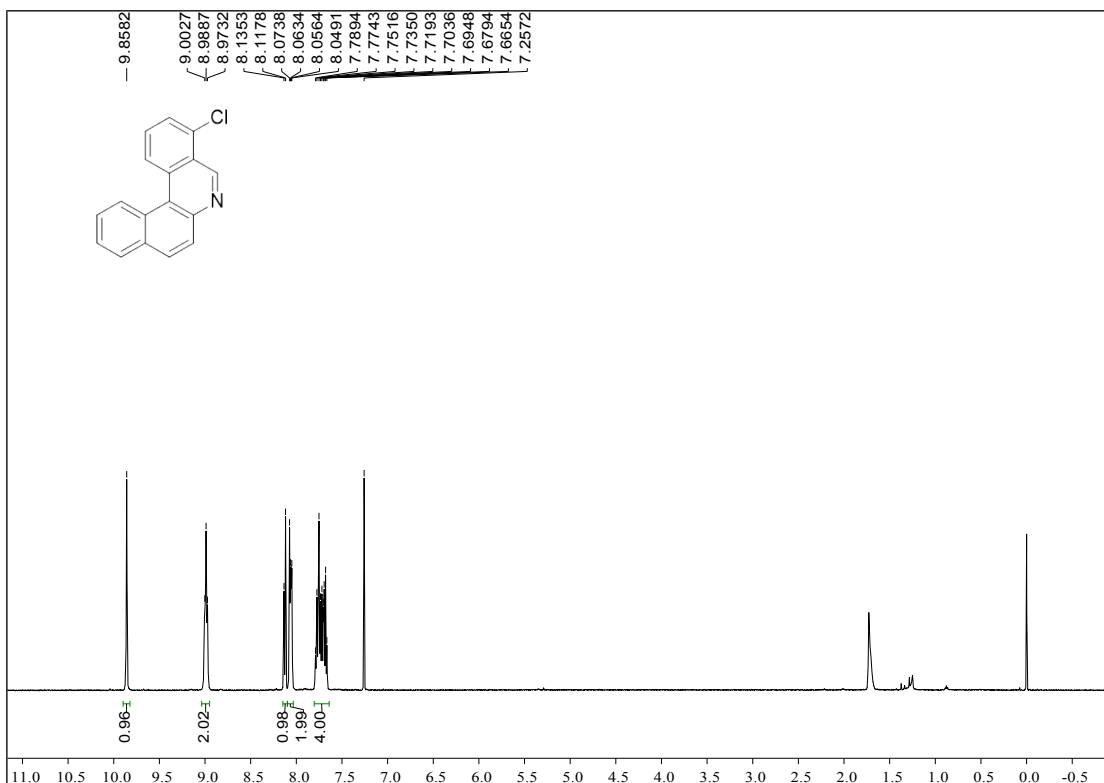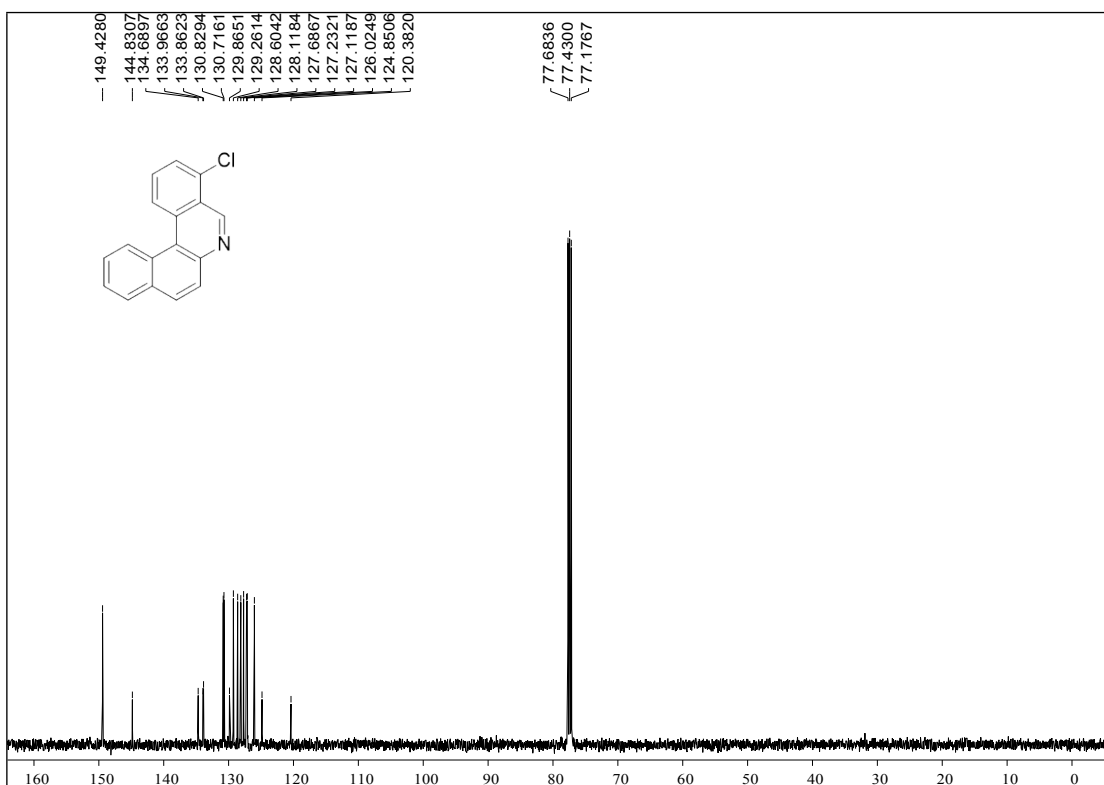

### 6-chlorothieno[2,3-c]isoquinoline (3ar)

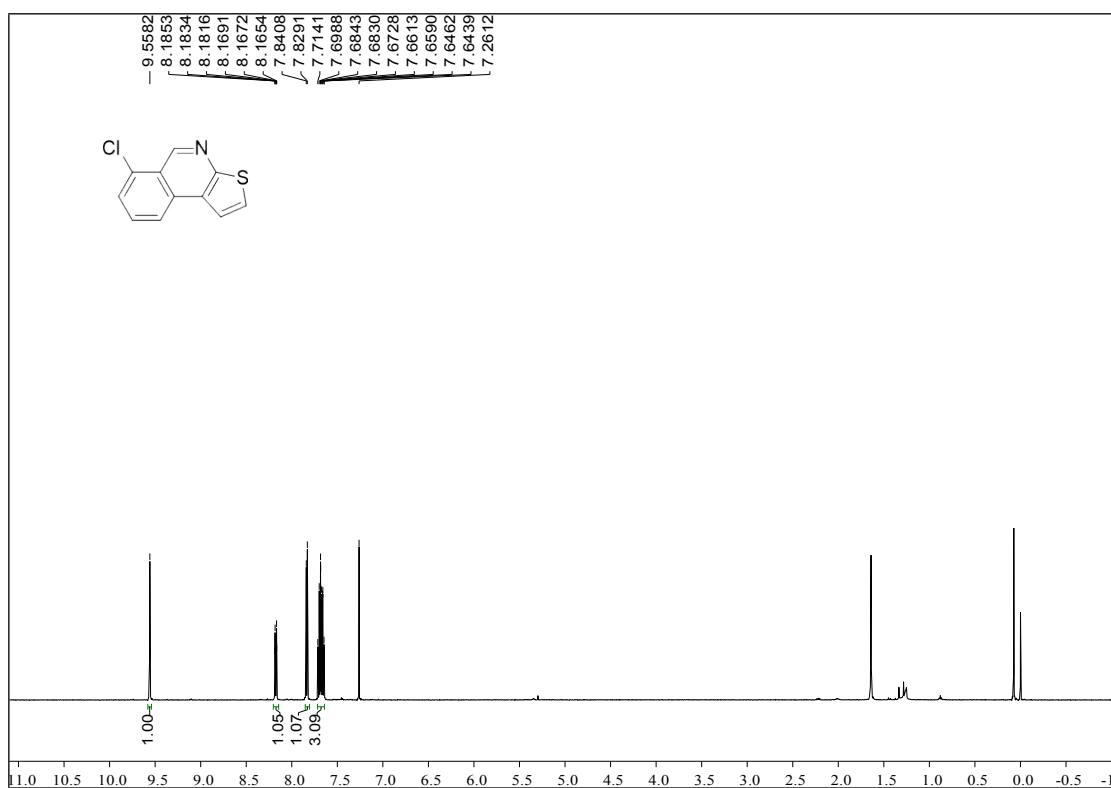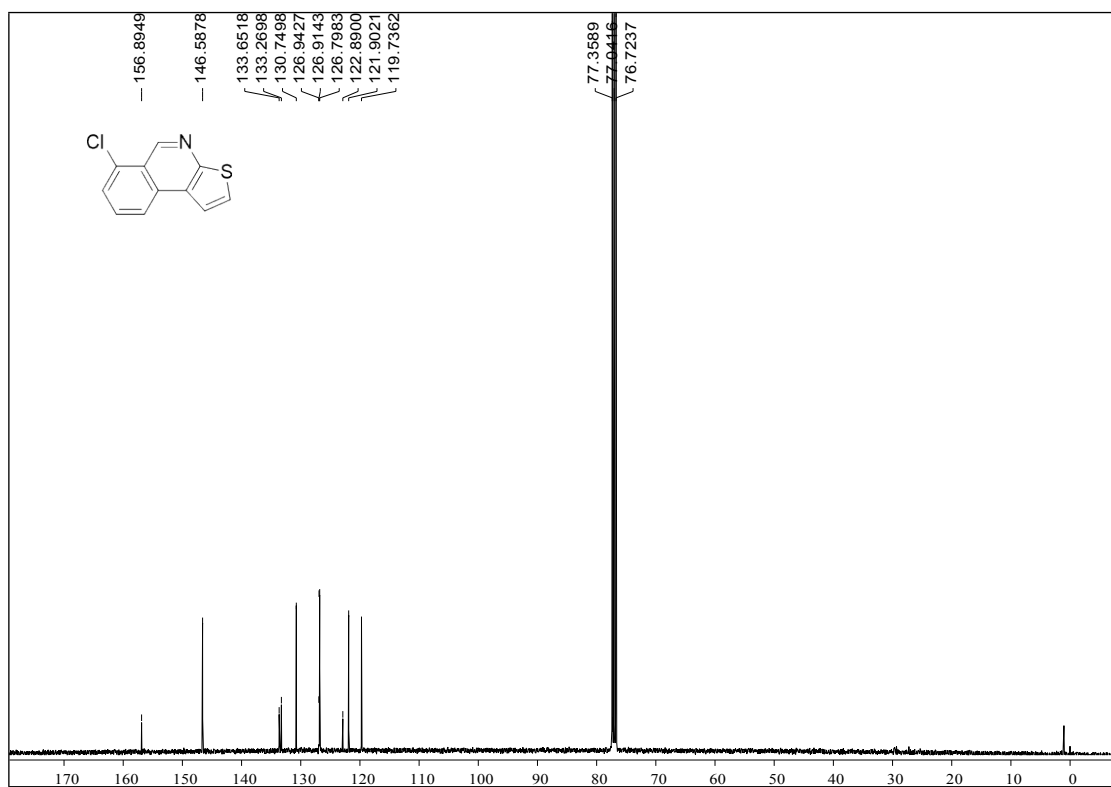

### 2,4-dichloro-7-methylphenanthridine (3dm)

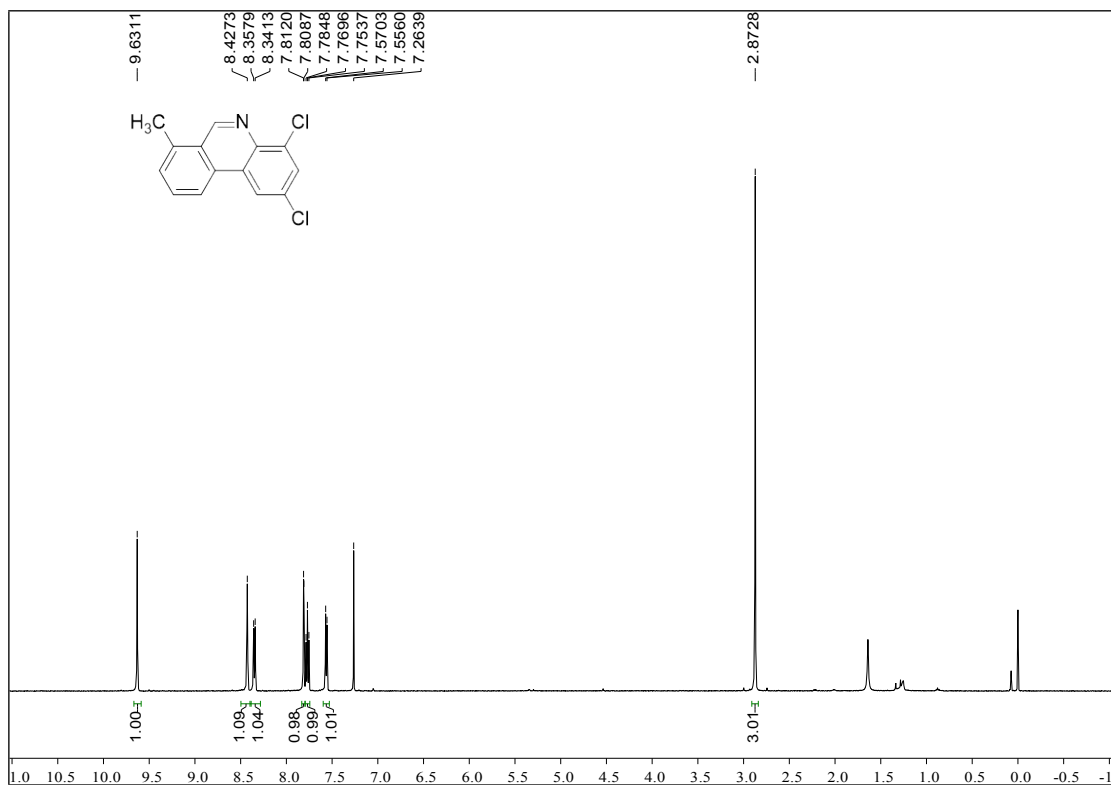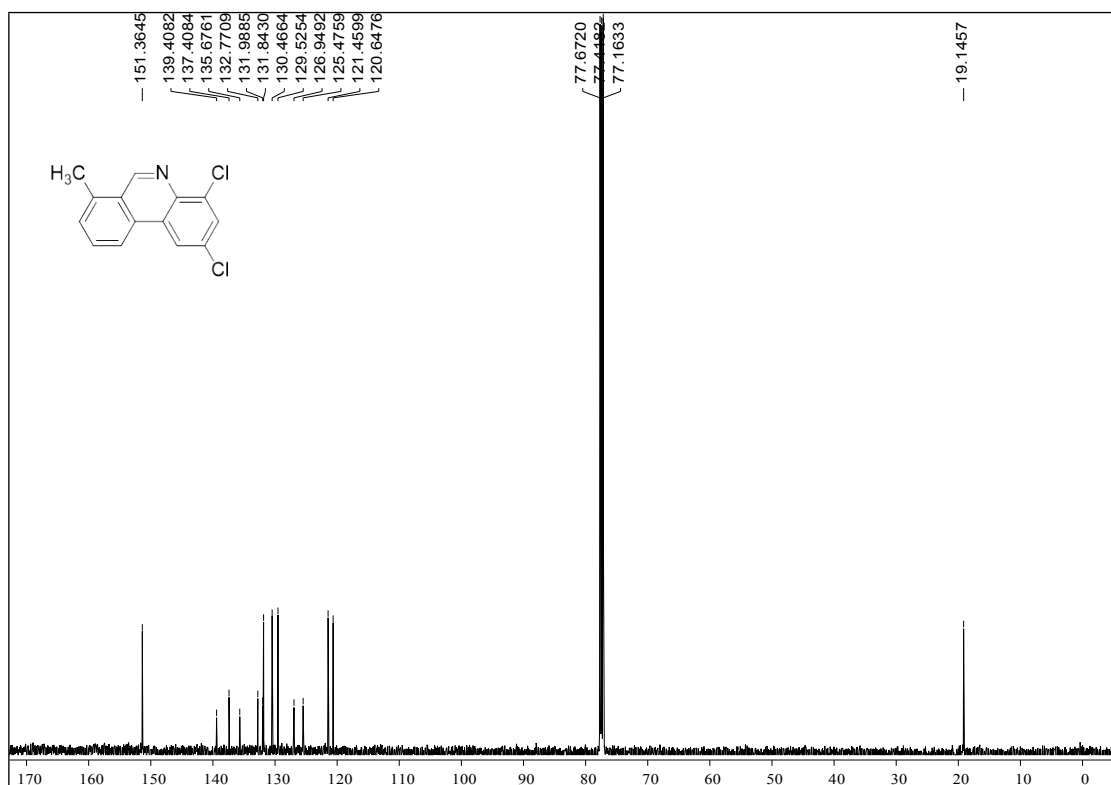

**methyl 7,10-dichlorophenanthridine-3-carboxylate (3nh)**

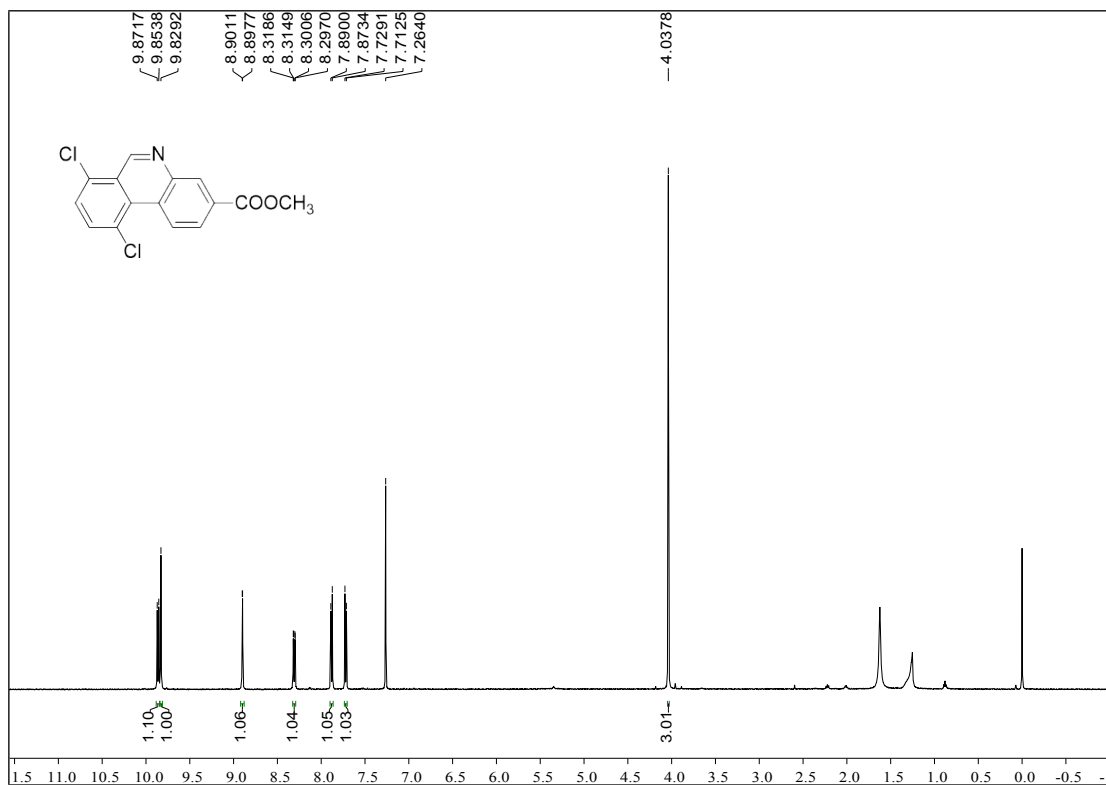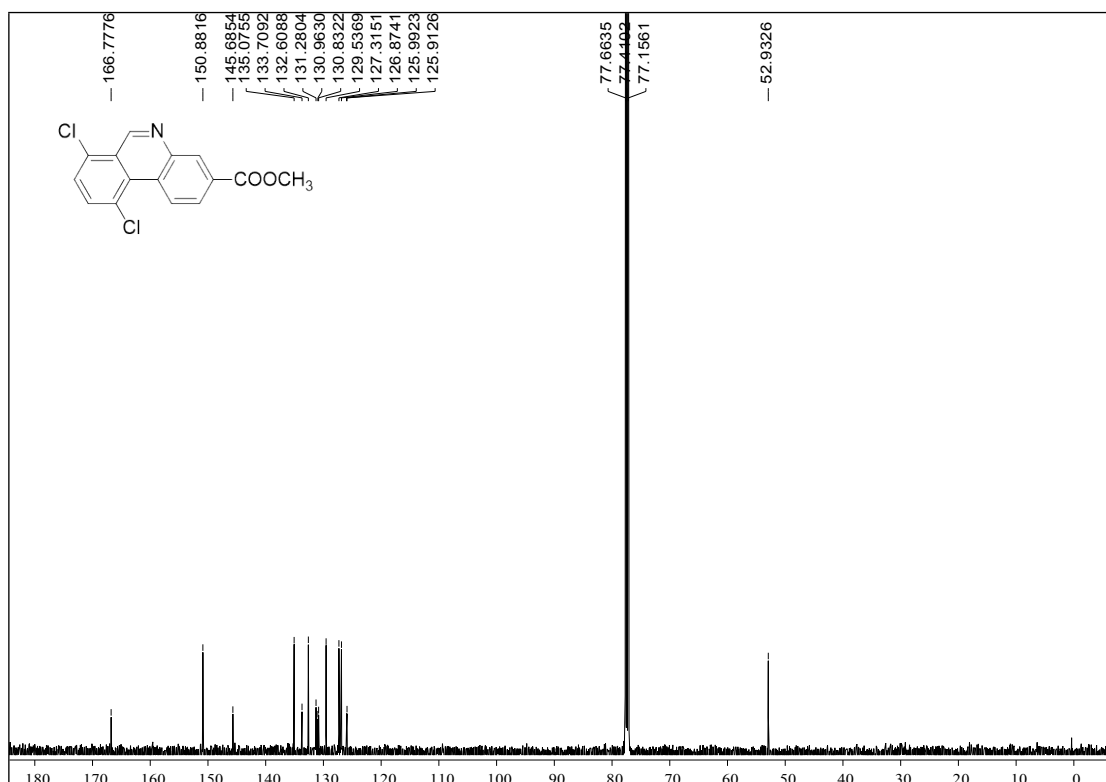

### 3-chloro-[1,1'-biphenyl]-2-carbaldehyde (A)

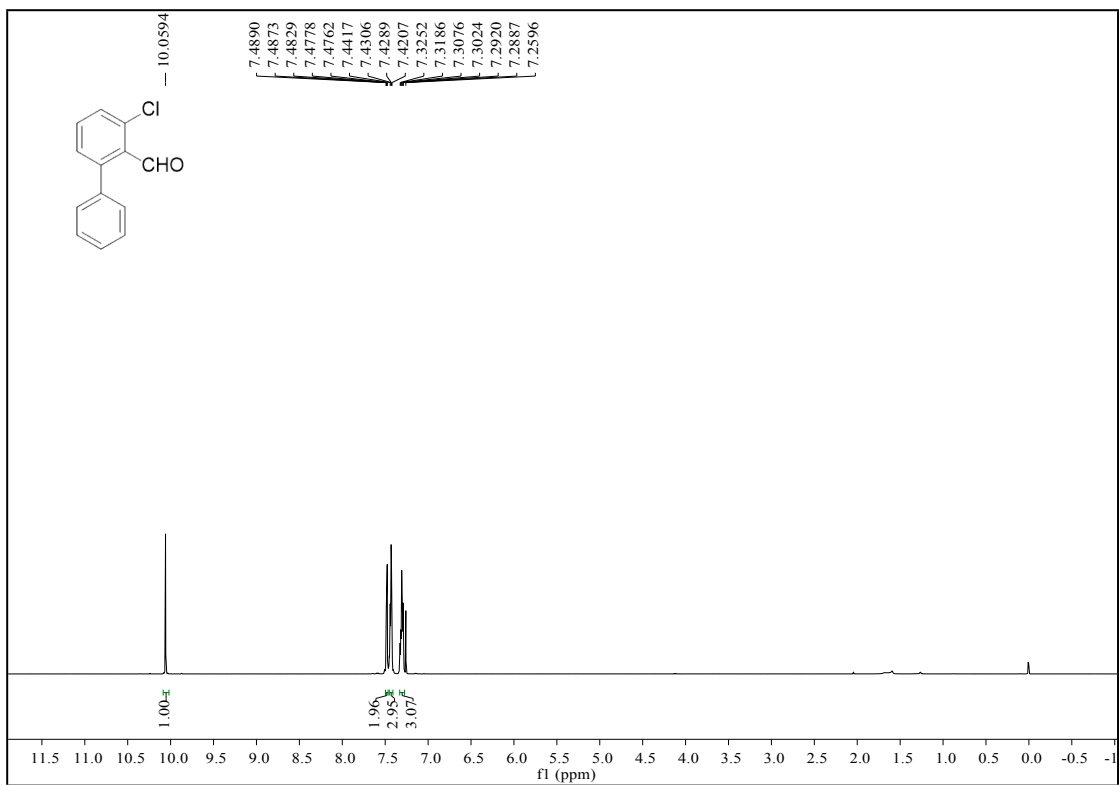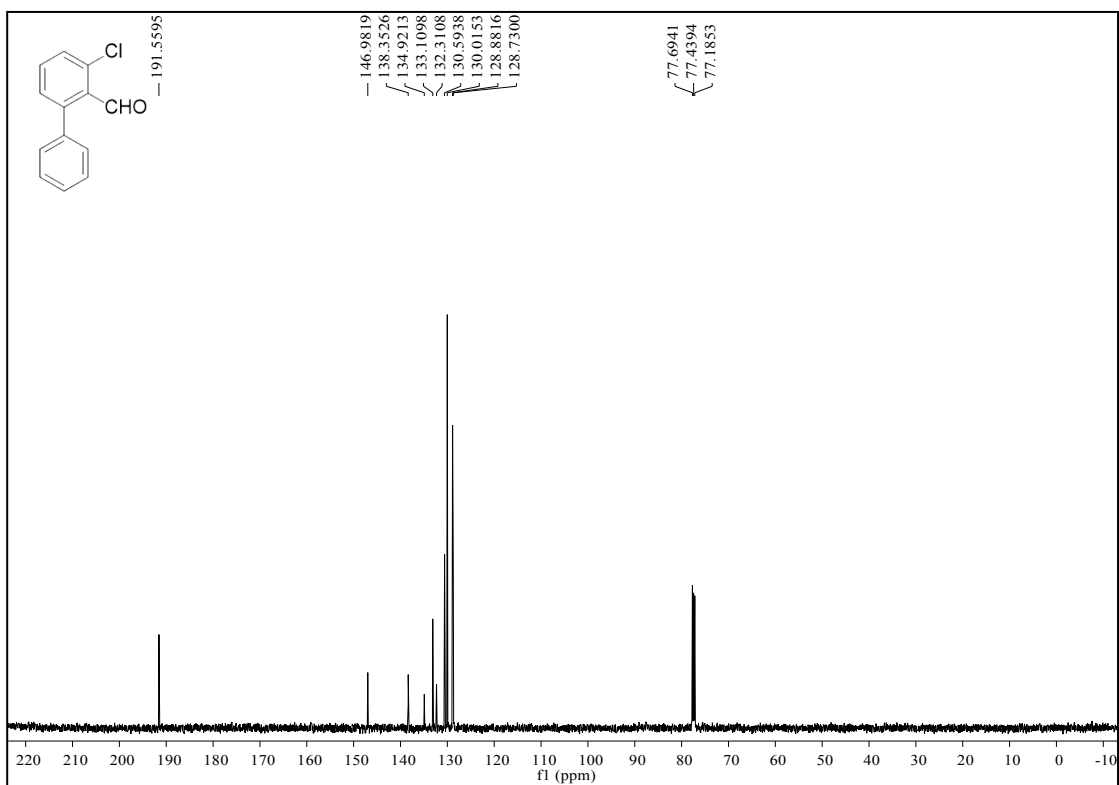

### 1- chloro-9H-fluoren-9-one (B)

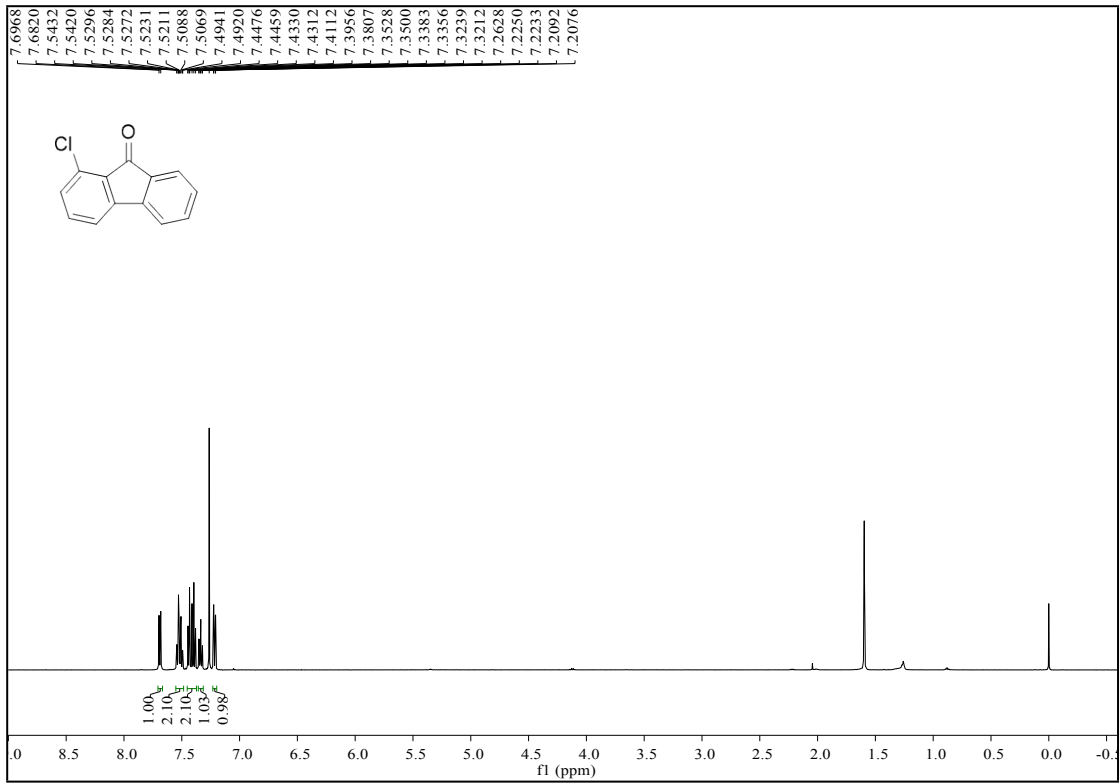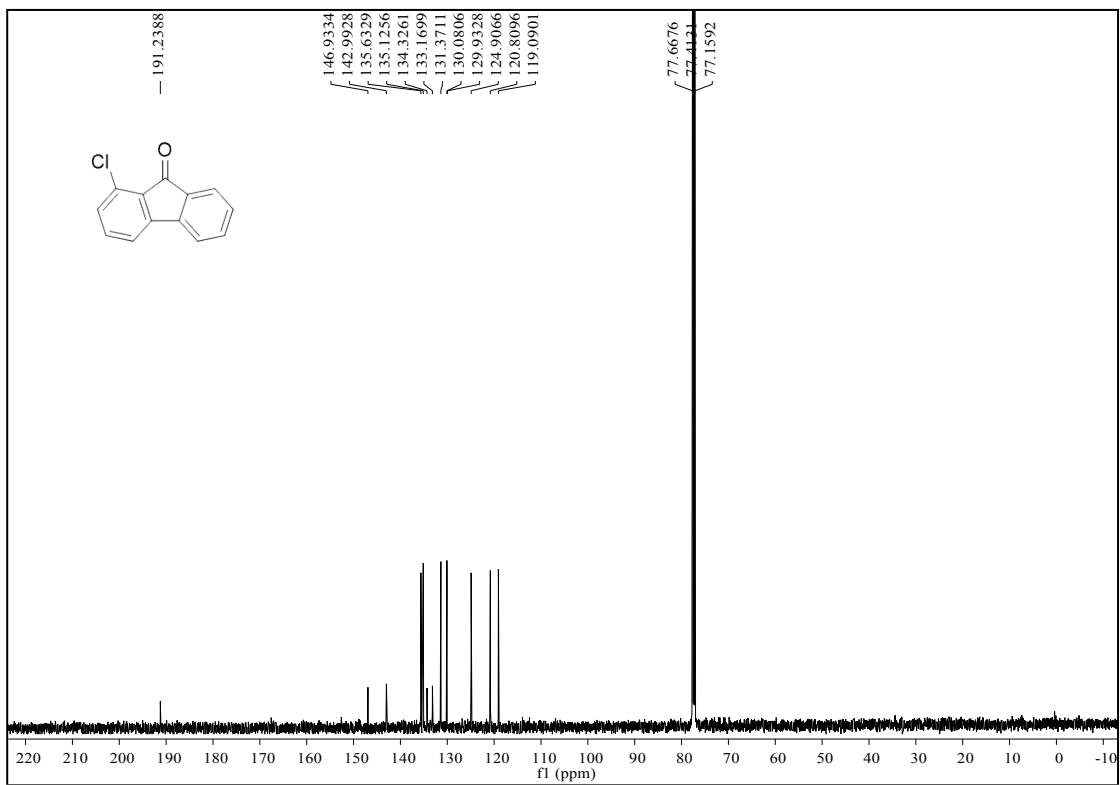

Supplement: d0cc00300j1.pdf [file d0cc00300j1.pdf]
